# Supplementary material
Source: PubMed Central journal article supplement (PMC5135339)
Supplement: pnas.1615258113.sd01.pdf [file pnas.1615258113.sd01.pdf]

## Top 5% Differentially Expressed Genes, Tg26 Lymphoma vs. Tg26 Asymptomatic Lymph Node and Spleen

| SYMBOL        | logFC   | AveExpr | t      | P.Value  | adj.P.Val | B     | ENTREZ ID                 | GENE NAME                   |
|---------------|---------|---------|--------|----------|-----------|-------|---------------------------|-----------------------------|
| 0610010F05Rik | 0.9297  | 7.256   | 9.068  | 4.73E-09 | 1.74E-07  | 10.74 | <a href="#">71675</a>     | RIKEN cDNA 0610010F05 gene  |
| 1700021K19Rik | -0.9421 | 8.26    | -12.33 | 1.30E-11 | 1.24E-09  | 16.68 | <a href="#">100502698</a> | RIKEN cDNA 1700021K19 gene  |
| 1700048O20Rik | 2.36    | 8.331   | 15.94  | 6.49E-14 | 1.76E-11  | 21.97 | <a href="#">69430</a>     | RIKEN cDNA 1700048O20 gene  |
| 2010016I18Rik | -1.561  | 7.863   | -10.22 | 5.11E-10 | 2.63E-08  | 12.99 | <a href="#">69206</a>     | RIKEN cDNA 2010016I18 gene  |
| 2010111I01Rik | 0.7153  | 7.255   | 9.437  | 2.28E-09 | 9.32E-08  | 11.47 | <a href="#">72061</a>     | RIKEN cDNA 2010111I01 gene  |
| 2610318N02Rik | 2.704   | 7.631   | 15.69  | 9.09E-14 | 2.24E-11  | 21.64 | <a href="#">70458</a>     | RIKEN cDNA 2610318N02 gene  |
| 2610528A11Rik | -0.8579 | 7.827   | -8.625 | 1.16E-08 | 3.63E-07  | 9.826 | <a href="#">70045</a>     | RIKEN cDNA 2610528A11 gene  |
| 2700094K13Rik | 0.783   | 7.596   | 8.664  | 1.07E-08 | 3.38E-07  | 9.906 | <a href="#">72657</a>     | RIKEN cDNA 2700094K13 gene  |
| 2810025M15Rik | 0.8209  | 7.7     | 13.06  | 4.08E-12 | 4.74E-10  | 17.85 | <a href="#">69953</a>     | RIKEN cDNA 2810025M15 gene  |
| 2810417H13Rik | 2.459   | 9.522   | 18.32  | 3.33E-15 | 2.07E-12  | 24.89 | <a href="#">68026</a>     | RIKEN cDNA 2810417H13 gene  |
| 2900026A02Rik | 1.185   | 7.619   | 9.905  | 9.26E-10 | 4.40E-08  | 12.39 | <a href="#">243219</a>    | RIKEN cDNA 2900026A02 gene  |
| 3010003L21Rik | 0.8263  | 6.848   | 8.606  | 1.21E-08 | 3.74E-07  | 9.787 | <a href="#">109163</a>    | RIKEN cDNA 3010003L21 gene  |
| 3110007F17Rik | 1.751   | 5.995   | 19.88  | 5.69E-16 | 6.74E-13  | 26.6  | <a href="#">73061</a>     | RIKEN cDNA 3110007F17 gene  |
| 4921507P07Rik | -0.8962 | 5.894   | -8.637 | 1.14E-08 | 3.55E-07  | 9.85  | <a href="#">70821</a>     | RIKEN cDNA 4921507P07 gene  |
| 4930427A07Rik | 1.289   | 7.584   | 15.26  | 1.63E-13 | 3.50E-11  | 21.06 | <a href="#">104732</a>    | RIKEN cDNA 4930427A07 gene  |
| 4930506M07Rik | -1.298  | 6.74    | -8.63  | 1.15E-08 | 3.60E-07  | 9.836 | <a href="#">71653</a>     | RIKEN cDNA 4930506M07 gene  |
| 4930524J08Rik | 0.5529  | 6.91    | 9.544  | 1.85E-09 | 7.80E-08  | 11.69 | ---                       | RIKEN cDNA 4930524J08 gene  |
| 4930579G24Rik | 1.015   | 7.746   | 12.28  | 1.41E-11 | 1.32E-09  | 16.6  | <a href="#">75939</a>     | RIKEN cDNA 4930579G24 gene  |
| 4931429I11Rik | 2.166   | 9.04    | 18.61  | 2.36E-15 | 1.68E-12  | 25.22 | <a href="#">70989</a>     | RIKEN cDNA 4931429I11 gene  |
| 4933426M11Rik | -0.8203 | 9.443   | -10.76 | 1.90E-10 | 1.17E-08  | 13.99 | <a href="#">217684</a>    | RIKEN cDNA 4933426M11 gene  |
| 4933439C10Rik | 1.525   | 8.019   | 8.331  | 2.14E-08 | 6.12E-07  | 9.207 | <a href="#">74476</a>     | RIKEN cDNA 4933439C10 gene  |
| A130050O07Rik | 1.544   | 6.021   | 8.82   | 7.80E-09 | 2.59E-07  | 10.23 | <a href="#">320138</a>    | RIKEN cDNA A130050O07 gene  |
| A630038E17Rik | -1.061  | 6.492   | -12.14 | 1.77E-11 | 1.60E-09  | 16.38 | <a href="#">219065</a>    | RIKEN cDNA A630038E17 gene  |
| AA415398      | -0.7155 | 6.365   | -9.54  | 1.86E-09 | 7.84E-08  | 11.68 | <a href="#">433752</a>    | expressed sequence AA415398 |
| AA467197      | 1.075   | 5.959   | 8.315  | 2.22E-08 | 6.30E-07  | 9.173 | <a href="#">433470</a>    | expressed sequence AA467197 |

|          |         |       |        |          |          |       |                        |                                                                                               |
|----------|---------|-------|--------|----------|----------|-------|------------------------|-----------------------------------------------------------------------------------------------|
| Abca1    | -2.129  | 8.307 | -9.261 | 3.22E-09 | 1.25E-07 | 11.12 | <a href="#">11303</a>  | ATP-binding cassette sub-family A (ABC1) member 1                                             |
| Abcf2    | 0.5166  | 9.182 | 8.97   | 5.76E-09 | 2.04E-07 | 10.54 | <a href="#">27407</a>  | ATP-binding cassette sub-family F (GCN20) member 2                                            |
| Abcg3    | -1.607  | 8.047 | -8.341 | 2.10E-08 | 6.05E-07 | 9.227 | <a href="#">27405</a>  | ATP-binding cassette sub-family G (WHITE) member 3                                            |
| Abhd15   | 1.314   | 7.273 | 8.238  | 2.61E-08 | 7.25E-07 | 9.008 | <a href="#">67477</a>  | abhydrolase domain containing 15                                                              |
| Abl1     | 0.5135  | 9.419 | 9.032  | 5.09E-09 | 1.85E-07 | 10.66 | <a href="#">11350</a>  | c-abl oncogene 1 non-receptor tyrosine kinase                                                 |
| Abtb2    | -1.326  | 7.69  | -11.38 | 6.40E-11 | 4.64E-09 | 15.08 | <a href="#">99382</a>  | ankyrin repeat and BTB (POZ) domain containing 2                                              |
| Acp6     | 0.9899  | 8.839 | 8.842  | 7.46E-09 | 2.50E-07 | 10.28 | <a href="#">66659</a>  | acid phosphatase 6 lysophosphatidic                                                           |
| Actl6a   | 0.7127  | 9.976 | 12.05  | 2.06E-11 | 1.81E-09 | 16.22 | <a href="#">56456</a>  | actin-like 6A                                                                                 |
| Actn1    | -2.698  | 9.292 | -17.74 | 6.66E-15 | 3.38E-12 | 24.21 | <a href="#">109711</a> | actinin alpha 1                                                                               |
| Acvrl1   | -1.022  | 7.475 | -12.55 | 9.16E-12 | 9.31E-10 | 17.04 | <a href="#">11482</a>  | activin A receptor type II-like 1                                                             |
| Ada      | 0.7729  | 8.017 | 8.521  | 1.44E-08 | 4.35E-07 | 9.608 | <a href="#">11486</a>  | adenosine deaminase                                                                           |
| Adam22   | -0.6282 | 5.578 | -8.024 | 4.11E-08 | 1.08E-06 | 8.547 | <a href="#">11496</a>  | a disintegrin and metallopeptidase domain 22                                                  |
| Adam23   | -1.874  | 7.778 | -12.5  | 9.83E-12 | 9.88E-10 | 16.97 | <a href="#">23792</a>  | a disintegrin and metallopeptidase domain 23                                                  |
| Adamts14 | -0.6046 | 6.83  | -8.09  | 3.57E-08 | 9.56E-07 | 8.69  | <a href="#">237360</a> | a disintegrin-like and metallopeptidase (reprolysin type) with thrombospondin type 1 motif 14 |
| Adcy3    | -0.7716 | 7.515 | -8.528 | 1.42E-08 | 4.29E-07 | 9.624 | <a href="#">104111</a> | adenylate cyclase 3                                                                           |
| Adcy6    | -1.22   | 7.055 | -11.66 | 3.94E-11 | 3.11E-09 | 15.57 | <a href="#">11512</a>  | adenylate cyclase 6                                                                           |
| Add1     | -0.7164 | 9.739 | -9.929 | 8.84E-10 | 4.23E-08 | 12.43 | <a href="#">11518</a>  | adducin 1 (alpha)                                                                             |

|          |         |       |        |          |          |       |                        |                                                                    |
|----------|---------|-------|--------|----------|----------|-------|------------------------|--------------------------------------------------------------------|
| Add3     | -0.9563 | 10.25 | -9.081 | 4.61E-09 | 1.70E-07 | 10.76 | <a href="#">27360</a>  | adducin 3 (gamma)                                                  |
| Adh1     | -2.544  | 7.797 | -14.72 | 3.47E-13 | 6.59E-11 | 20.31 | <a href="#">11522</a>  | alcohol dehydrogenase 1 (class I)                                  |
| Adrbk2   | -1.581  | 7.48  | -9.829 | 1.07E-09 | 4.93E-08 | 12.24 | <a href="#">320129</a> | adrenergic receptor kinase beta 2                                  |
| Adss     | 0.469   | 9.486 | 8.468  | 1.61E-08 | 4.79E-07 | 9.497 | <a href="#">11566</a>  | adenylosuccinate synthetase non muscle                             |
| Aes      | -1.079  | 10.77 | -9.068 | 4.73E-09 | 1.74E-07 | 10.74 | <a href="#">14797</a>  | amino-terminal enhancer of split                                   |
| Aff1     | 0.5168  | 8.168 | 8.316  | 2.21E-08 | 6.29E-07 | 9.175 | <a href="#">17355</a>  | AF4/FMR2 family member 1                                           |
| Agpat9   | 1.48    | 7.225 | 12.1   | 1.91E-11 | 1.71E-09 | 16.3  | <a href="#">231510</a> | 1-acylglycerol-3-phosphate O-acyltransferase 9                     |
| Ahcy     | 1.09    | 8.991 | 9.152  | 4.00E-09 | 1.50E-07 | 10.91 | <a href="#">269378</a> | S-adenosylhomocysteine hydrolase                                   |
| AI314180 | 0.8272  | 9.291 | 11.03  | 1.19E-10 | 7.83E-09 | 14.46 | <a href="#">230249</a> | expressed sequence AI314180                                        |
| Akap12   | 1.669   | 8.133 | 11.62  | 4.26E-11 | 3.31E-09 | 15.49 | <a href="#">83397</a>  | A kinase (PRKA) anchor protein (gravin) 12                         |
| Aldh1b1  | 1.588   | 7.713 | 8.597  | 1.23E-08 | 3.80E-07 | 9.766 | <a href="#">72535</a>  | aldehyde dehydrogenase 1 family member B1                          |
| Aldh4a1  | -1.314  | 6.961 | -8.961 | 5.86E-09 | 2.07E-07 | 10.52 | <a href="#">212647</a> | aldehyde dehydrogenase 4 family member A1                          |
| Alg6     | 0.9056  | 7.001 | 10.83  | 1.69E-10 | 1.06E-08 | 14.11 | <a href="#">320438</a> | asparagine-linked glycosylation 6 (alpha-1 3 -glucosyltransferase) |
| Alkbh8   | 0.5824  | 8.53  | 8.659  | 1.08E-08 | 3.41E-07 | 9.897 | <a href="#">67667</a>  | alkB alkylation repair homolog 8 (E. coli)                         |
| Alms1    | 1.105   | 7.199 | 9.939  | 8.68E-10 | 4.18E-08 | 12.45 | <a href="#">236266</a> | Alstrom syndrome 1                                                 |
| Alyref   | 0.7895  | 9.829 | 9.306  | 2.95E-09 | 1.16E-07 | 11.22 | <a href="#">21681</a>  | Aly/REF export factor                                              |

|          |         |       |        |          |          |       |                           |                                                                                                    |
|----------|---------|-------|--------|----------|----------|-------|---------------------------|----------------------------------------------------------------------------------------------------|
| Amd2     | 1.273   | 8.862 | 11.72  | 3.61E-11 | 2.90E-09 | 15.66 | <a href="#">100041585</a> | S-adenosylmethionine decarboxylase 2                                                               |
| Ammechr1 | 1.283   | 8.448 | 13.22  | 3.18E-12 | 3.85E-10 | 18.1  | <a href="#">56068</a>     | Alport syndrome mental retardation midface hypoplasia and elliptocytosis chromosomal region gene 1 |
| Angel1   | -0.8102 | 7.335 | -8.928 | 6.27E-09 | 2.18E-07 | 10.45 | <a href="#">68737</a>     | angel homolog 1 (Drosophila)                                                                       |
| Ank      | -1.549  | 8.376 | -9.878 | 9.75E-10 | 4.58E-08 | 12.33 | <a href="#">11732</a>     | progressive ankylosis                                                                              |
| Ankrd13d | 0.9477  | 7.605 | 8.802  | 8.09E-09 | 2.66E-07 | 10.19 | <a href="#">68423</a>     | ankyrin repeat domain 13 family member D                                                           |
| Ankrd28  | 1.467   | 9.371 | 12.43  | 1.11E-11 | 1.09E-09 | 16.84 | <a href="#">105522</a>    | ankyrin repeat domain 28                                                                           |
| Ankrd52  | 0.8388  | 9.106 | 8.226  | 2.67E-08 | 7.42E-07 | 8.983 | <a href="#">237615</a>    | ankyrin repeat domain 52                                                                           |
| Ankrd6   | 1.087   | 6.777 | 11.88  | 2.72E-11 | 2.29E-09 | 15.94 | <a href="#">140577</a>    | ankyrin repeat domain 6                                                                            |
| Anln     | 2.389   | 7.33  | 15.75  | 8.36E-14 | 2.11E-11 | 21.72 | <a href="#">68743</a>     | anillin actin binding protein                                                                      |
| Anp32e   | 1.039   | 9.318 | 8.557  | 1.34E-08 | 4.07E-07 | 9.684 | <a href="#">66471</a>     | acidic (leucine-rich) nuclear phosphoprotein 32 family member E                                    |
| Anxa5    | -1.514  | 9.273 | -9.777 | 1.18E-09 | 5.36E-08 | 12.14 | <a href="#">11747</a>     | annexin A5                                                                                         |
| Ap1ar    | 0.8949  | 9.965 | 10.49  | 3.12E-10 | 1.73E-08 | 13.48 | <a href="#">211556</a>    | adaptor-related protein complex 1 associated regulatory protein                                    |
| Apaf1    | 0.83    | 8.489 | 11.18  | 9.02E-11 | 6.23E-09 | 14.74 | <a href="#">11783</a>     | apoptotic peptidase activating factor 1                                                            |
| Apex1    | 0.9911  | 8.969 | 10.84  | 1.66E-10 | 1.05E-08 | 14.12 | <a href="#">11792</a>     | apurinic/aprimidinic endonuclease 1                                                                |
| Apitd1   | 1.239   | 7.739 | 9.635  | 1.55E-09 | 6.71E-08 | 11.86 | <a href="#">69928</a>     | apoptosis-inducing TAF9-like domain 1                                                              |

|           |         |       |        |          |          |       |                        |                                                                                       |
|-----------|---------|-------|--------|----------|----------|-------|------------------------|---------------------------------------------------------------------------------------|
| Appl2     | -1.011  | 8.208 | -8.375 | 1.96E-08 | 5.69E-07 | 9.299 | <a href="#">216190</a> | adaptor protein phosphotyrosine interaction PH domain and leucine zipper containing 2 |
| Ar        | -1.999  | 6.356 | -17.35 | 1.07E-14 | 4.62E-12 | 23.75 | <a href="#">11835</a>  | androgen receptor                                                                     |
| Arhgap11a | 1.881   | 8.459 | 16.59  | 2.79E-14 | 9.46E-12 | 22.8  | <a href="#">228482</a> | Rho GTPase activating protein 11A                                                     |
| Arhgap19  | 1.444   | 7.943 | 13.63  | 1.71E-12 | 2.29E-10 | 18.72 | <a href="#">71085</a>  | Rho GTPase activating protein 19                                                      |
| Arhgap28  | -0.7321 | 5.861 | -8.992 | 5.51E-09 | 1.97E-07 | 10.58 | <a href="#">268970</a> | Rho GTPase activating protein 28                                                      |
| Arhgap5   | -2.14   | 6.685 | -10.17 | 5.62E-10 | 2.86E-08 | 12.89 | <a href="#">11855</a>  | Rho GTPase activating protein 5                                                       |
| Arhgef39  | 0.8367  | 7.45  | 9.91   | 9.18E-10 | 4.37E-08 | 12.4  | <a href="#">230098</a> | Rho guanine nucleotide exchange factor (GEF) 39                                       |
| Arid5b    | -0.7532 | 9.504 | -8.147 | 3.16E-08 | 8.54E-07 | 8.814 | <a href="#">71371</a>  | AT rich interactive domain 5B (MRF1-like)                                             |
| Arl4c     | -1.397  | 7.587 | -10.49 | 3.10E-10 | 1.73E-08 | 13.49 | <a href="#">320982</a> | ADP-ribosylation factor-like 4C                                                       |
| Arl5c     | 1.013   | 9.154 | 8.783  | 8.41E-09 | 2.75E-07 | 10.15 | <a href="#">217151</a> | ADP-ribosylation factor-like 5C                                                       |
| Arl6ip1   | 0.6137  | 10.82 | 9.895  | 9.43E-10 | 4.46E-08 | 12.37 | <a href="#">54208</a>  | ADP-ribosylation factor-like 6 interacting protein 1                                  |
| Arntl2    | 1.715   | 6.495 | 20.36  | 3.36E-16 | 4.58E-13 | 27.11 | <a href="#">272322</a> | aryl hydrocarbon receptor nuclear translocator-like 2                                 |
| Arrdc4    | -1.28   | 6.928 | -10.06 | 6.89E-10 | 3.41E-08 | 12.68 | <a href="#">66412</a>  | arrestin domain containing 4                                                          |
| Art2a-ps  | -0.9625 | 5.779 | -9.551 | 1.83E-09 | 7.72E-08 | 11.7  | <a href="#">11871</a>  | ADP-ribosyltransferase 2a pseudogene                                                  |
| Art2b     | -2.367  | 6.447 | -12.4  | 1.16E-11 | 1.13E-09 | 16.8  | <a href="#">11872</a>  | ADP-ribosyltransferase 2b                                                             |
| Asf1a     | 0.8386  | 8.465 | 10.46  | 3.30E-10 | 1.83E-08 | 13.43 | <a href="#">66403</a>  | anti-silencing function 1A histone chaperone                                          |

|               |         |       |        |          |          |       |                        |                                                                  |
|---------------|---------|-------|--------|----------|----------|-------|------------------------|------------------------------------------------------------------|
| Asf1b         | 1.774   | 9.481 | 12.19  | 1.63E-11 | 1.51E-09 | 16.46 | <a href="#">66929</a>  | anti-silencing function 1B histone chaperone                     |
| Aspm          | 2.163   | 7.125 | 15.76  | 8.29E-14 | 2.10E-11 | 21.73 | <a href="#">12316</a>  | asp (abnormal spindle)-like microcephaly associated (Drosophila) |
| Atad2         | 1.033   | 8.41  | 9.148  | 4.03E-09 | 1.51E-07 | 10.9  | <a href="#">70472</a>  | ATPase family AAA domain containing 2                            |
| Atad5         | 1.606   | 6.844 | 13.46  | 2.22E-12 | 2.85E-10 | 18.46 | <a href="#">237877</a> | ATPase family AAA domain containing 5                            |
| Atl2          | 0.8457  | 8.404 | 9.348  | 2.72E-09 | 1.08E-07 | 11.3  | <a href="#">56298</a>  | atlastin GTPase 2                                                |
| Atp11a        | -1.28   | 7.628 | -14.77 | 3.22E-13 | 6.19E-11 | 20.38 | <a href="#">50770</a>  | ATPase class VI type 11A                                         |
| Atp13a2       | 0.6461  | 8.937 | 8.693  | 1.01E-08 | 3.22E-07 | 9.967 | <a href="#">74772</a>  | ATPase type 13A2                                                 |
| Atp13a3       | 0.9206  | 9.997 | 8.208  | 2.78E-08 | 7.65E-07 | 8.945 | <a href="#">224088</a> | ATPase type 13A3                                                 |
| Atp2b1        | -0.7638 | 9.542 | -8.965 | 5.82E-09 | 2.06E-07 | 10.53 | <a href="#">67972</a>  | ATPase Ca <sup>++</sup> transporting plasma membrane 1           |
| Atp9a         | -1.503  | 7.046 | -8.031 | 4.05E-08 | 1.07E-06 | 8.563 | <a href="#">11981</a>  | ATPase class II type 9A                                          |
| Aurka         | 1.534   | 8.049 | 17.42  | 9.79E-15 | 4.48E-12 | 23.83 | <a href="#">20878</a>  | aurora kinase A                                                  |
| Aurkb         | 2.044   | 9.184 | 18.84  | 1.82E-15 | 1.35E-12 | 25.47 | <a href="#">20877</a>  | aurora kinase B                                                  |
| Axin2         | -1.362  | 7.198 | -14.52 | 4.60E-13 | 8.06E-11 | 20.03 | <a href="#">12006</a>  | axin2                                                            |
| B230118H07Rik | 1.748   | 4.283 | 10.43  | 3.46E-10 | 1.90E-08 | 13.38 | <a href="#">68170</a>  | RIKEN cDNA B230118H07 gene                                       |
| B3glct        | 0.9477  | 8.298 | 11.35  | 6.78E-11 | 4.88E-09 | 15.02 | <a href="#">381694</a> | beta-3-glucosyltransferase                                       |
| Bard1         | 1.393   | 7.064 | 10.63  | 2.41E-10 | 1.41E-08 | 13.75 | <a href="#">12021</a>  | BRCA1 associated RING domain 1                                   |
| Basp1         | -1.267  | 9.01  | -13.31 | 2.75E-12 | 3.41E-10 | 18.24 | <a href="#">70350</a>  | brain abundant membrane attached signal protein 1                |
| BC021614      | -1.615  | 7.239 | -8.833 | 7.60E-09 | 2.53E-07 | 10.26 | <a href="#">225884</a> | cDNA sequence BC021614                                           |
| BC030867      | 0.9419  | 6.223 | 11.17  | 9.28E-11 | 6.36E-09 | 14.71 | <a href="#">217216</a> | cDNA sequence BC030867                                           |
| BC043934      | 1.371   | 7.115 | 8.179  | 2.95E-08 | 8.06E-07 | 8.882 | <a href="#">270185</a> | cDNA sequence BC043934                                           |
| BC055324      | 1.165   | 7.191 | 11.16  | 9.43E-11 | 6.42E-09 | 14.69 | <a href="#">381306</a> | cDNA sequence BC055324                                           |

|        |         |       |        |          |          |       |                        |                                                                       |
|--------|---------|-------|--------|----------|----------|-------|------------------------|-----------------------------------------------------------------------|
| Bcat1  | 2.42    | 7.68  | 9.749  | 1.25E-09 | 5.61E-08 | 12.09 | <a href="#">12035</a>  | branched chain aminotransferase 1 cytosolic                           |
| Bcl11b | -2.383  | 8.937 | -14.27 | 6.61E-13 | 1.08E-10 | 19.67 | <a href="#">58208</a>  | B cell leukemia/lymphoma 11B                                          |
| Bcl2   | -1.328  | 9.18  | -10.54 | 2.84E-10 | 1.61E-08 | 13.58 | <a href="#">12043</a>  | B cell leukemia/lymphoma 2                                            |
| Bcl7a  | 1.21    | 9.559 | 12.46  | 1.06E-11 | 1.05E-09 | 16.89 | <a href="#">77045</a>  | B cell CLL/lymphoma 7A                                                |
| Bcr    | 1.182   | 8.396 | 10.56  | 2.73E-10 | 1.55E-08 | 13.62 | <a href="#">110279</a> | breakpoint cluster region                                             |
| Bend5  | -1.35   | 7.517 | -13.9  | 1.14E-12 | 1.66E-10 | 19.12 | <a href="#">67621</a>  | BEN domain containing 5                                               |
| Bfsp2  | 2       | 7.45  | 16.36  | 3.72E-14 | 1.18E-11 | 22.52 | <a href="#">107993</a> | beaded filament structural protein 2 phakinin                         |
| Birc5  | 1.709   | 7.218 | 11.16  | 9.40E-11 | 6.42E-09 | 14.7  | <a href="#">11799</a>  | baculoviral IAP repeat-containing 5                                   |
| Blm    | 1.489   | 7.736 | 16.64  | 2.60E-14 | 8.97E-12 | 22.87 | <a href="#">12144</a>  | Bloom syndrome RecQ helicase-like                                     |
| Blmh   | 0.9657  | 8.754 | 13.66  | 1.64E-12 | 2.21E-10 | 18.76 | <a href="#">104184</a> | bleomycin hydrolase                                                   |
| Bmf    | 1.17    | 8.556 | 10.92  | 1.43E-10 | 9.27E-09 | 14.27 | <a href="#">171543</a> | BCL2 modifying factor                                                 |
| Bmp7   | -0.8257 | 7.173 | -11.03 | 1.18E-10 | 7.76E-09 | 14.47 | <a href="#">12162</a>  | bone morphogenetic protein 7                                          |
| Bmpr2  | -1.736  | 7.641 | -8.232 | 2.64E-08 | 7.34E-07 | 8.995 | <a href="#">12168</a>  | bone morphogenetic protein receptor type II (serine/threonine kinase) |
| Boll   | -1.132  | 5.505 | -10.7  | 2.13E-10 | 1.28E-08 | 13.87 | <a href="#">75388</a>  | bol boule-like (Drosophila)                                           |
| Bora   | 1.615   | 7.592 | 11.08  | 1.08E-10 | 7.18E-09 | 14.56 | <a href="#">77744</a>  | bora aurora kinase A activator                                        |
| Brca1  | 1.27    | 6.945 | 11.56  | 4.71E-11 | 3.62E-09 | 15.39 | <a href="#">12189</a>  | breast cancer 1                                                       |
| Brca2  | 1.175   | 7.087 | 10.14  | 5.99E-10 | 3.03E-08 | 12.83 | <a href="#">12190</a>  | breast cancer 2                                                       |
| Brd7   | 0.5342  | 9.315 | 10.16  | 5.76E-10 | 2.92E-08 | 12.87 | <a href="#">26992</a>  | bromodomain containing 7                                              |
| Brip1  | 1.834   | 6.811 | 15.98  | 6.15E-14 | 1.71E-11 | 22.02 | <a href="#">237911</a> | BRCA1 interacting protein C-terminal helicase 1                       |
| Brwd1  | -2.28   | 7.733 | -16.41 | 3.52E-14 | 1.14E-11 | 22.58 | <a href="#">93871</a>  | bromodomain and WD repeat domain containing 1                         |

|               |         |       |        |          |          |       |                        |                                                                      |
|---------------|---------|-------|--------|----------|----------|-------|------------------------|----------------------------------------------------------------------|
| Btbd11        | -0.7295 | 6.66  | -8.295 | 2.31E-08 | 6.52E-07 | 9.131 | <a href="#">74007</a>  | BTB (POZ) domain containing 11                                       |
| Btk           | 0.835   | 9.687 | 9.004  | 5.37E-09 | 1.94E-07 | 10.61 | <a href="#">12229</a>  | Bruton agammaglobulinemia tyrosine kinase                            |
| Btla          | -2.174  | 8.515 | -9.658 | 1.49E-09 | 6.48E-08 | 11.91 | <a href="#">208154</a> | B and T lymphocyte associated budding uninhibited by                 |
| Bub1          | 2.695   | 7.713 | 16.22  | 4.49E-14 | 1.35E-11 | 22.33 | <a href="#">12235</a>  | benzimidazoles 1 homolog (S. cerevisiae)                             |
| Bub1b         | 2.561   | 8.085 | 19.44  | 9.23E-16 | 8.82E-13 | 26.13 | <a href="#">12236</a>  | budding uninhibited by benzimidazoles 1 homolog beta (S. cerevisiae) |
| Bub3          | 0.7336  | 9.623 | 11.96  | 2.40E-11 | 2.06E-09 | 16.07 | <a href="#">12237</a>  | budding uninhibited by benzimidazoles 3 homolog (S. cerevisiae)      |
| C330027C09Rik | 2.592   | 7.214 | 19.3   | 1.08E-15 | 8.90E-13 | 25.98 | <a href="#">224171</a> | RIKEN cDNA C330027C09 gene                                           |
| C78339        | -0.5032 | 9.176 | -8.67  | 1.06E-08 | 3.35E-07 | 9.919 | <a href="#">97863</a>  | expressed sequence C78339                                            |
| Cabp4         | 1.648   | 8.031 | 15.96  | 6.29E-14 | 1.72E-11 | 22    | <a href="#">73660</a>  | calcium binding protein 4                                            |
| Cacna1d       | -0.7248 | 6.169 | -8.284 | 2.37E-08 | 6.66E-07 | 9.107 | <a href="#">12289</a>  | calcium channel voltage-dependent L type alpha 1D subunit            |
| Cacnb3        | -1.795  | 7.736 | -13.48 | 2.12E-12 | 2.74E-10 | 18.5  | <a href="#">12297</a>  | calcium channel voltage-dependent beta 3 subunit                     |
| Cadm1         | -1.096  | 7.166 | -11.52 | 5.02E-11 | 3.80E-09 | 15.33 | <a href="#">54725</a>  | cell adhesion molecule 1                                             |
| Camk4         | -1.811  | 6.953 | -12.25 | 1.48E-11 | 1.39E-09 | 16.55 | <a href="#">12326</a>  | calcium/calmodulin-dependent protein kinase IV                       |
| Capsl         | 1.979   | 6.044 | 17.66  | 7.35E-15 | 3.63E-12 | 24.11 | <a href="#">75568</a>  | calcyphosine-like                                                    |
| Card11        | -1.289  | 9.385 | -8.339 | 2.11E-08 | 6.07E-07 | 9.224 | <a href="#">108723</a> | caspase recruitment domain family member 11                          |



|         |         |       |        |          |          |       |                        |                                    |
|---------|---------|-------|--------|----------|----------|-------|------------------------|------------------------------------|
| Casc5   | 2.224   | 8.207 | 14.28  | 6.49E-13 | 1.06E-10 | 19.69 | <a href="#">76464</a>  | cancer susceptibility candidate 5  |
| Cast    | -0.6945 | 9.334 | -8.359 | 2.02E-08 | 5.87E-07 | 9.265 | <a href="#">12380</a>  | calpastatin                        |
| Cbx1    | 0.7329  | 8.861 | 9.288  | 3.05E-09 | 1.19E-07 | 11.18 | <a href="#">12412</a>  | chromobox 1                        |
| Cbx3    | 0.6814  | 10.18 | 9.516  | 1.95E-09 | 8.14E-08 | 11.63 | <a href="#">12417</a>  | chromobox 3                        |
| Cbx5    | 1.067   | 9.066 | 10.69  | 2.19E-10 | 1.31E-08 | 13.84 | <a href="#">12419</a>  | chromobox 5                        |
| Cbx7    | -1.327  | 8.281 | -9.2   | 3.64E-09 | 1.39E-07 | 11    | <a href="#">52609</a>  | chromobox 7                        |
| Ccdc122 | -1.046  | 5.381 | -8.75  | 9.00E-09 | 2.91E-07 | 10.08 | <a href="#">108811</a> | coiled-coil domain containing 122  |
| Ccdc135 | 4.556   | 7.593 | 25.79  | 1.83E-18 | 1.30E-14 | 32.02 | <a href="#">330830</a> | coiled-coil domain containing 135  |
| Ccdc138 | 0.8633  | 6.232 | 8.485  | 1.55E-08 | 4.66E-07 | 9.533 | <a href="#">76138</a>  | coiled-coil domain containing 138  |
| Ccdc14  | 0.7662  | 6.74  | 7.988  | 4.44E-08 | 1.16E-06 | 8.47  | <a href="#">239839</a> | coiled-coil domain containing 14   |
| Ccdc18  | 1.484   | 5.721 | 11.2   | 8.69E-11 | 6.05E-09 | 14.77 | <a href="#">73254</a>  | coiled-coil domain containing 18   |
| Ccdc34  | 1.11    | 7.113 | 11.47  | 5.46E-11 | 4.09E-09 | 15.24 | <a href="#">68201</a>  | coiled-coil domain containing 34   |
| Ccl22   | -1.426  | 7.093 | -9.683 | 1.41E-09 | 6.21E-08 | 11.96 | <a href="#">20299</a>  | chemokine (C-C motif) ligand 22    |
| Ccl5    | -2.474  | 10.2  | -9.872 | 9.85E-10 | 4.61E-08 | 12.32 | <a href="#">20304</a>  | chemokine (C-C motif) ligand 5     |
| Ccna2   | 2.126   | 9.449 | 15.61  | 1.00E-13 | 2.41E-11 | 21.54 | <a href="#">12428</a>  | cyclin A2                          |
| Ccnb1   | 2.519   | 7.133 | 19.43  | 9.32E-16 | 8.82E-13 | 26.12 | <a href="#">268697</a> | cyclin B1                          |
| Ccnb2   | 2.12    | 9.35  | 14.98  | 2.40E-13 | 4.90E-11 | 20.68 | <a href="#">12442</a>  | cyclin B2                          |
| Ccnd3   | 1.068   | 10.09 | 9.052  | 4.88E-09 | 1.79E-07 | 10.7  | <a href="#">12445</a>  | cyclin D3                          |
| Ccne2   | 1.748   | 6.816 | 13.03  | 4.27E-12 | 4.91E-10 | 17.8  | <a href="#">12448</a>  | cyclin E2                          |
| Ccnf    | 1.895   | 7.678 | 17.32  | 1.11E-14 | 4.75E-12 | 23.71 | <a href="#">12449</a>  | cyclin F                           |
| Ccp110  | 0.9377  | 7.146 | 10.79  | 1.80E-10 | 1.12E-08 | 14.04 | <a href="#">101565</a> | centriolar coiled coil protein 110 |

|         |         |       |        |          |          |       |                        |                                                                                                      |
|---------|---------|-------|--------|----------|----------|-------|------------------------|------------------------------------------------------------------------------------------------------|
| Cct3    | 0.6627  | 9.909 | 8.41   | 1.82E-08 | 5.32E-07 | 9.374 | <a href="#">12462</a>  | chaperonin containing Tcp1 subunit 3 (gamma)                                                         |
| Cd200   | -1.776  | 7.556 | -8.932 | 6.22E-09 | 2.17E-07 | 10.46 | <a href="#">17470</a>  | CD200 antigen                                                                                        |
| Cd200r4 | -0.8537 | 4.207 | -8.336 | 2.12E-08 | 6.09E-07 | 9.216 | <a href="#">239849</a> | CD200 receptor 4                                                                                     |
| Cd209d  | -2.268  | 7.296 | -14.12 | 8.27E-13 | 1.25E-10 | 19.44 | <a href="#">170779</a> | CD209d antigen                                                                                       |
| Cd226   | -2.579  | 7.266 | -13.74 | 1.44E-12 | 2.02E-10 | 18.89 | <a href="#">225825</a> | CD226 antigen                                                                                        |
| Cd244   | 1.851   | 7.79  | 10.34  | 4.08E-10 | 2.18E-08 | 13.22 | <a href="#">18106</a>  | CD244 natural killer cell receptor 2B4                                                               |
| Cd247   | -1.687  | 7.591 | -11.4  | 6.20E-11 | 4.50E-09 | 15.11 | <a href="#">12503</a>  | CD247 antigen                                                                                        |
| Cd27    | -3.069  | 8.904 | -12.62 | 8.22E-12 | 8.48E-10 | 17.15 | <a href="#">21940</a>  | CD27 antigen                                                                                         |
| Cd274   | -1.554  | 9.195 | -9.237 | 3.38E-09 | 1.30E-07 | 11.08 | <a href="#">60533</a>  | CD274 antigen                                                                                        |
| Cd28    | -2.775  | 8.566 | -13.72 | 1.50E-12 | 2.07E-10 | 18.85 | <a href="#">12487</a>  | CD28 antigen                                                                                         |
| Cd3d    | -2.883  | 7.858 | -13.18 | 3.37E-12 | 4.02E-10 | 18.04 | <a href="#">12500</a>  | CD3 antigen delta polypeptide                                                                        |
| Cd3e    | -2.896  | 10.13 | -12.56 | 9.03E-12 | 9.20E-10 | 17.05 | <a href="#">12501</a>  | CD3 antigen epsilon polypeptide                                                                      |
| Cd3g    | -3.851  | 9.449 | -12.76 | 6.56E-12 | 6.99E-10 | 17.37 | <a href="#">12502</a>  | CD3 antigen gamma polypeptide                                                                        |
| Cd4     | -3.307  | 9.456 | -13.24 | 3.09E-12 | 3.77E-10 | 18.13 | <a href="#">12504</a>  | CD4 antigen                                                                                          |
| Cd40    | -1.569  | 9.228 | -11.25 | 8.03E-11 | 5.64E-09 | 14.85 | <a href="#">21939</a>  | CD40 antigen                                                                                         |
| Cd40lg  | -2.185  | 6.448 | -10.81 | 1.75E-10 | 1.10E-08 | 14.07 | <a href="#">21947</a>  | CD40 ligand                                                                                          |
| Cd5     | -2.274  | 9.213 | -8.744 | 9.10E-09 | 2.93E-07 | 10.07 | <a href="#">12507</a>  | CD5 antigen                                                                                          |
| Cd55    | -1.494  | 9.296 | -8.081 | 3.64E-08 | 9.72E-07 | 8.671 | <a href="#">13136</a>  | CD55 antigen                                                                                         |
| Cd6     | -2.344  | 8.247 | -12.41 | 1.14E-11 | 1.11E-09 | 16.82 | <a href="#">12511</a>  | CD6 antigen                                                                                          |
| Cd7     | -2.652  | 9.423 | -13.02 | 4.36E-12 | 4.99E-10 | 17.78 | <a href="#">12516</a>  | CD7 antigen                                                                                          |
| Cd74    | -1.442  | 12.26 | -8.926 | 6.29E-09 | 2.18E-07 | 10.45 | <a href="#">16149</a>  | CD74 antigen (invariant polypeptide of major histocompatibility complex class II antigen-associated) |
| Cd83    | -2.334  | 8.997 | -11.08 | 1.08E-10 | 7.18E-09 | 14.56 | <a href="#">12522</a>  | CD83 antigen                                                                                         |

|        |        |       |        |          |          |       |                        |                                                 |
|--------|--------|-------|--------|----------|----------|-------|------------------------|-------------------------------------------------|
| Cd8a   | -2.749 | 8.795 | -15.43 | 1.28E-13 | 2.92E-11 | 21.3  | <a href="#">12525</a>  | CD8 antigen alpha chain                         |
| Cd8b1  | -2.917 | 8.484 | -13.46 | 2.20E-12 | 2.83E-10 | 18.47 | <a href="#">12526</a>  | CD8 antigen beta chain 1                        |
| Cd93   | 3.12   | 9.141 | 19.31  | 1.07E-15 | 8.90E-13 | 25.99 | <a href="#">17064</a>  | CD93 antigen                                    |
| Cd96   | -3.117 | 8.222 | -14.24 | 6.89E-13 | 1.11E-10 | 19.63 | <a href="#">84544</a>  | CD96 antigen                                    |
| Cdc14b | -1.275 | 7.364 | -8.988 | 5.55E-09 | 1.98E-07 | 10.57 | <a href="#">218294</a> | CDC14 cell division cycle 14B                   |
| Cdc20  | 1.744  | 8.17  | 21.23  | 1.35E-16 | 2.17E-13 | 27.99 | <a href="#">107995</a> | cell division cycle 20                          |
| Cdc25a | 1.106  | 8.355 | 15.54  | 1.11E-13 | 2.59E-11 | 21.44 | <a href="#">12530</a>  | cell division cycle 25A                         |
| Cdc25c | 2.181  | 6.615 | 14.63  | 3.93E-13 | 7.21E-11 | 20.18 | <a href="#">12532</a>  | cell division cycle 25C                         |
| Cdc45  | 1.401  | 7.591 | 14.02  | 9.52E-13 | 1.42E-10 | 19.3  | <a href="#">12544</a>  | cell division cycle 45                          |
| Cdc6   | 1.315  | 7.308 | 14.48  | 4.84E-13 | 8.35E-11 | 19.98 | <a href="#">23834</a>  | cell division cycle 6                           |
| Cdca2  | 2.242  | 7.433 | 13.72  | 1.48E-12 | 2.06E-10 | 18.86 | <a href="#">108912</a> | cell division cycle associated 2                |
| Cdca3  | 1.656  | 7.794 | 12.81  | 6.06E-12 | 6.55E-10 | 17.45 | <a href="#">14793</a>  | cell division cycle associated 3                |
| Cdca5  | 1.833  | 7.619 | 16.57  | 2.86E-14 | 9.58E-12 | 22.78 | <a href="#">67849</a>  | cell division cycle associated 5                |
| Cdca7  | 2.027  | 8.546 | 16.79  | 2.16E-14 | 7.75E-12 | 23.06 | <a href="#">66953</a>  | cell division cycle associated 7                |
| Cdca7l | 1.121  | 8.486 | 13.67  | 1.60E-12 | 2.17E-10 | 18.78 | <a href="#">217946</a> | cell division cycle associated 7 like           |
| Cdca8  | 2.067  | 7.58  | 15.62  | 9.93E-14 | 2.40E-11 | 21.55 | <a href="#">52276</a>  | cell division cycle associated 8                |
| Cdhr2  | 3.151  | 6.872 | 11.11  | 1.03E-10 | 6.94E-09 | 14.6  | <a href="#">268663</a> | cadherin-related family member 2                |
| Cdhr4  | 0.9151 | 6.548 | 8.588  | 1.25E-08 | 3.85E-07 | 9.749 | <a href="#">69398</a>  | cadherin-related family member 4                |
| Cdk1   | 2.097  | 7.816 | 12.28  | 1.41E-11 | 1.32E-09 | 16.61 | <a href="#">12534</a>  | cyclin-dependent kinase 1                       |
| Cdk14  | -1.083 | 6.498 | -8.972 | 5.73E-09 | 2.03E-07 | 10.54 | <a href="#">18647</a>  | cyclin-dependent kinase 14                      |
| Cdk2   | 1.104  | 9.254 | 13.79  | 1.34E-12 | 1.90E-10 | 18.96 | <a href="#">12566</a>  | cyclin-dependent kinase 2                       |
| Cdk4   | 0.7077 | 10.68 | 9.873  | 9.83E-10 | 4.61E-08 | 12.33 | <a href="#">12567</a>  | cyclin-dependent kinase 4                       |
| Cdk6   | 1.322  | 9.289 | 8.948  | 6.02E-09 | 2.11E-07 | 10.49 | <a href="#">12571</a>  | cyclin-dependent kinase 6                       |
| Cdk9   | 0.4908 | 9.984 | 8.808  | 8.00E-09 | 2.64E-07 | 10.2  | <a href="#">107951</a> | cyclin-dependent kinase 9 (CDC2-related kinase) |

|        |        |       |        |          |          |       |                        |                                                   |
|--------|--------|-------|--------|----------|----------|-------|------------------------|---------------------------------------------------|
| Cdkn3  | 1.572  | 6.892 | 10.71  | 2.10E-10 | 1.27E-08 | 13.89 | <a href="#">72391</a>  | cyclin-dependent kinase inhibitor 3               |
| Cdyl2  | -1.676 | 7.997 | -17.65 | 7.45E-15 | 3.63E-12 | 24.1  | <a href="#">75796</a>  | chromodomain protein Y<br>chromosome-like 2       |
| Cecr2  | 2.599  | 8.666 | 22.99  | 2.34E-17 | 5.93E-14 | 29.65 | <a href="#">330409</a> | cat eye syndrome chromosome region<br>candidate 2 |
| Cenpa  | 1.58   | 9.519 | 17.83  | 5.98E-15 | 3.18E-12 | 24.31 | <a href="#">12615</a>  | centromere protein A                              |
| Cenpe  | 2.499  | 7.473 | 15.59  | 1.04E-13 | 2.47E-11 | 21.5  | <a href="#">229841</a> | centromere protein E                              |
| Cenpf  | 2.112  | 7.321 | 14.85  | 2.88E-13 | 5.66E-11 | 20.49 | <a href="#">108000</a> | centromere protein F                              |
| Cenph  | 2.047  | 6.602 | 20.32  | 3.51E-16 | 4.58E-13 | 27.07 | <a href="#">26886</a>  | centromere protein H                              |
| Cenpi  | 1.77   | 6.202 | 17.01  | 1.64E-14 | 6.48E-12 | 23.33 | <a href="#">102920</a> | centromere protein I                              |
| Cenpk  | 1.643  | 6.186 | 13.69  | 1.54E-12 | 2.11E-10 | 18.82 | <a href="#">60411</a>  | centromere protein K                              |
| Cenpl  | 0.9951 | 6.691 | 11.23  | 8.25E-11 | 5.76E-09 | 14.83 | <a href="#">70454</a>  | centromere protein L                              |
| Cenpm  | 1.466  | 7.971 | 15.54  | 1.11E-13 | 2.59E-11 | 21.44 | <a href="#">66570</a>  | centromere protein M                              |
| Cenpn  | 2.097  | 8.276 | 17.95  | 5.17E-15 | 2.83E-12 | 24.46 | <a href="#">72155</a>  | centromere protein N                              |
| Cenpp  | 1.541  | 5.868 | 11.21  | 8.65E-11 | 6.03E-09 | 14.78 | <a href="#">66336</a>  | centromere protein P                              |
| Cenpw  | 0.8512 | 6.231 | 9.052  | 4.89E-09 | 1.79E-07 | 10.7  | <a href="#">66311</a>  | centromere protein W                              |
| Cep128 | 1.012  | 7.969 | 8.279  | 2.39E-08 | 6.70E-07 | 9.096 | <a href="#">75216</a>  | centrosomal protein 128                           |
| Cep55  | 2.058  | 7.697 | 17.23  | 1.24E-14 | 5.19E-12 | 23.6  | <a href="#">74107</a>  | centrosomal protein 55                            |
| Cep68  | 0.7798 | 9.115 | 8.992  | 5.51E-09 | 1.97E-07 | 10.58 | <a href="#">216543</a> | centrosomal protein 68                            |
| Cep78  | 0.724  | 7.769 | 11.71  | 3.66E-11 | 2.92E-09 | 15.65 | <a href="#">208518</a> | centrosomal protein 78                            |
| Cep83  | 1.202  | 7.813 | 17.4   | 1.01E-14 | 4.48E-12 | 23.81 | <a href="#">77048</a>  | centrosomal protein 83                            |
| Cep85  | 0.7529 | 7.313 | 8.838  | 7.52E-09 | 2.51E-07 | 10.27 | <a href="#">70012</a>  | centrosomal protein 85                            |
| Cerk   | 1.032  | 9.445 | 11.4   | 6.19E-11 | 4.50E-09 | 15.12 | <a href="#">223753</a> | ceramide kinase                                   |
| Cers5  | 0.7233 | 9.961 | 8.876  | 6.96E-09 | 2.37E-07 | 10.34 | <a href="#">71949</a>  | ceramide synthase 5                               |
| Cers6  | -1.676 | 8.203 | -12.35 | 1.27E-11 | 1.21E-09 | 16.71 | <a href="#">241447</a> | ceramide synthase 6                               |
| Chaf1a | 1.515  | 7.642 | 20.11  | 4.39E-16 | 5.38E-13 | 26.85 | <a href="#">27221</a>  | chromatin assembly factor 1 subunit A<br>(p150)   |

|        |         |       |        |          |          |       |                        |                                                                                 |
|--------|---------|-------|--------|----------|----------|-------|------------------------|---------------------------------------------------------------------------------|
| Chaf1b | 1.499   | 8.099 | 13.7   | 1.53E-12 | 2.10E-10 | 18.83 | <a href="#">110749</a> | chromatin assembly factor 1 subunit B (p60)                                     |
| Chek1  | 2.331   | 7.24  | 24.54  | 5.52E-18 | 1.96E-14 | 31    | <a href="#">12649</a>  | checkpoint kinase 1                                                             |
| Chek2  | 0.9071  | 6.89  | 9.31   | 2.92E-09 | 1.15E-07 | 11.22 | <a href="#">50883</a>  | checkpoint kinase 2                                                             |
| Chil5  | -0.8519 | 5.738 | -12.65 | 7.81E-12 | 8.14E-10 | 17.2  | <a href="#">229687</a> | chitinase-like 5                                                                |
| Chpf   | -0.6337 | 7.264 | -8.728 | 9.42E-09 | 3.03E-07 | 10.04 | <a href="#">74241</a>  | chondroitin polymerizing factor                                                 |
| Chst10 | -1.046  | 7.792 | -10.78 | 1.84E-10 | 1.15E-08 | 14.02 | <a href="#">98388</a>  | carbohydrate sulfotransferase 10                                                |
| Chst2  | -0.6555 | 6.995 | -8.696 | 1.01E-08 | 3.21E-07 | 9.973 | <a href="#">54371</a>  | carbohydrate sulfotransferase 2                                                 |
| Chtf18 | 0.9841  | 7.417 | 11.13  | 9.98E-11 | 6.75E-09 | 14.64 | <a href="#">214901</a> | CTF18 chromosome transmission fidelity factor 18                                |
| Ciita  | -2.233  | 8.819 | -11.81 | 3.06E-11 | 2.56E-09 | 15.82 | <a href="#">12265</a>  | class II transactivator                                                         |
| Cit    | 1.608   | 7.656 | 12.98  | 4.64E-12 | 5.23E-10 | 17.72 | <a href="#">12704</a>  | citron                                                                          |
| Cited2 | 0.7837  | 10.24 | 8.334  | 2.13E-08 | 6.09E-07 | 9.214 | <a href="#">17684</a>  | Cbp/p300-interacting transactivator with Glu/Asp-rich carboxy-terminal domain 2 |
| Ckap2  | 1.956   | 6.677 | 15.74  | 8.43E-14 | 2.11E-11 | 21.71 | <a href="#">80986</a>  | cytoskeleton associated protein 2                                               |
| Ckap2l | 1.749   | 7.456 | 16.69  | 2.46E-14 | 8.65E-12 | 22.93 | <a href="#">70466</a>  | cytoskeleton associated protein 2-like                                          |
| Ckap5  | 1.025   | 8.949 | 12.27  | 1.43E-11 | 1.34E-09 | 16.59 | <a href="#">75786</a>  | cytoskeleton associated protein 5                                               |
| Cks1b  | 2.19    | 8.752 | 16.39  | 3.62E-14 | 1.16E-11 | 22.55 | <a href="#">54124</a>  | CDC28 protein kinase 1b                                                         |
| Cks2   | 1.824   | 8.346 | 13.39  | 2.45E-12 | 3.10E-10 | 18.36 | <a href="#">66197</a>  | CDC28 protein kinase regulatory subunit 2                                       |
| Clec7a | -1.638  | 7.21  | -9.926 | 8.89E-10 | 4.25E-08 | 12.43 | <a href="#">56644</a>  | C-type lectin domain family 7 member a                                          |
| Clec9a | -1.904  | 6.41  | -11.75 | 3.39E-11 | 2.77E-09 | 15.72 | <a href="#">232414</a> | C-type lectin domain family 9 member a                                          |

|         |         |       |        |          |          |       |                        |                                                       |
|---------|---------|-------|--------|----------|----------|-------|------------------------|-------------------------------------------------------|
| Clhc1   | 0.7471  | 7.955 | 10.05  | 7.07E-10 | 3.48E-08 | 12.66 | <a href="#">69885</a>  | clathrin heavy chain linker domain containing 1       |
| Cln8    | -0.9842 | 6.176 | -9.899 | 9.35E-10 | 4.44E-08 | 12.38 | <a href="#">26889</a>  | ceroid-lipofuscinosis neuronal 8                      |
| Clspn   | 1.805   | 7.161 | 13.65  | 1.65E-12 | 2.23E-10 | 18.75 | <a href="#">269582</a> | claspin                                               |
| Cmc2    | 1.465   | 9.083 | 10.62  | 2.45E-10 | 1.42E-08 | 13.73 | <a href="#">66531</a>  | COX assembly mitochondrial protein 2                  |
| Cmss1   | 0.965   | 7.725 | 15.17  | 1.84E-13 | 3.89E-11 | 20.94 | <a href="#">66497</a>  | cms small ribosomal subunit 1                         |
| Cmtm7   | 2.121   | 9.794 | 19.37  | 9.92E-16 | 8.82E-13 | 26.06 | <a href="#">102545</a> | CKLF-like MARVEL transmembrane domain containing 7    |
| Cnbd2   | -0.6665 | 5.839 | -8.85  | 7.34E-09 | 2.47E-07 | 10.29 | <a href="#">70873</a>  | cyclic nucleotide binding domain containing 2         |
| Cnga1   | -1.079  | 5.005 | -9.988 | 7.91E-10 | 3.83E-08 | 12.55 | <a href="#">12788</a>  | cyclic nucleotide gated channel alpha 1               |
| Cnn2    | -0.9594 | 11.11 | -8.847 | 7.38E-09 | 2.48E-07 | 10.29 | <a href="#">12798</a>  | calponin 2                                            |
| Cnot6   | 0.5776  | 9.96  | 8.33   | 2.15E-08 | 6.13E-07 | 9.205 | <a href="#">104625</a> | CCR4-NOT transcription complex subunit 6              |
| Cnr2    | -1.647  | 8.443 | -9.022 | 5.19E-09 | 1.88E-07 | 10.64 | <a href="#">12802</a>  | cannabinoid receptor 2 (macrophage)                   |
| Cnrip1  | 1.147   | 7.725 | 9.819  | 1.09E-09 | 5.00E-08 | 12.22 | <a href="#">380686</a> | cannabinoid receptor interacting protein 1            |
| Cntl    | 1.82    | 7.172 | 13.85  | 1.22E-12 | 1.75E-10 | 19.06 | <a href="#">338349</a> | centlein centrosomal protein                          |
| Col27a1 | 0.9383  | 8.031 | 11.75  | 3.40E-11 | 2.77E-09 | 15.72 | <a href="#">373864</a> | collagen type XXVII alpha 1                           |
| Coro7   | 1.001   | 10.04 | 8.861  | 7.17E-09 | 2.43E-07 | 10.31 | <a href="#">78885</a>  | coronin 7                                             |
| Cpeb2   | -1.218  | 7.432 | -9.627 | 1.58E-09 | 6.79E-08 | 11.85 | <a href="#">231207</a> | cytoplasmic polyadenylation element binding protein 2 |
| Cplx2   | 2.074   | 7.274 | 13.13  | 3.63E-12 | 4.27E-10 | 17.97 | <a href="#">12890</a>  | complexin 2                                           |
| Cpne4   | -1.98   | 6.985 | -18.84 | 1.82E-15 | 1.35E-12 | 25.47 | <a href="#">74020</a>  | copine IV                                             |

|        |         |       |        |          |          |       |                        |                                                  |
|--------|---------|-------|--------|----------|----------|-------|------------------------|--------------------------------------------------|
| Cpsf2  | 0.9853  | 8.923 | 15.37  | 1.40E-13 | 3.15E-11 | 21.21 | <a href="#">51786</a>  | cleavage and polyadenylation specific factor 2   |
| Cr2    | -3.112  | 9.406 | -12.9  | 5.22E-12 | 5.80E-10 | 17.6  | <a href="#">12902</a>  | complement receptor 2                            |
| Crbn   | -0.9202 | 9.589 | -8.266 | 2.46E-08 | 6.87E-07 | 9.067 | <a href="#">58799</a>  | cereblon                                         |
| Crebl2 | -1.028  | 8.28  | -12.46 | 1.05E-11 | 1.04E-09 | 16.9  | <a href="#">232430</a> | cAMP responsive element binding protein-like 2   |
| Crebrf | -0.7623 | 9.053 | -8.282 | 2.38E-08 | 6.68E-07 | 9.102 | <a href="#">77128</a>  | CREB3 regulatory factor                          |
| Crip1  | 0.7059  | 11.12 | 8.834  | 7.59E-09 | 2.53E-07 | 10.26 | <a href="#">12925</a>  | cysteine-rich protein 1 (intestinal)             |
| Crtam  | -1.133  | 6.643 | -8.316 | 2.21E-08 | 6.29E-07 | 9.175 | <a href="#">54698</a>  | cytotoxic and regulatory T cell molecule         |
| Cse1l  | 0.5286  | 10.87 | 8.277  | 2.40E-08 | 6.72E-07 | 9.091 | <a href="#">110750</a> | chromosome segregation 1-like (S. cerevisiae)    |
| Cspp1  | 0.8446  | 8.141 | 11.06  | 1.13E-10 | 7.48E-09 | 14.51 | <a href="#">211660</a> | centrosome and spindle pole associated protein 1 |
| Cst7   | -1.515  | 8.231 | -8.619 | 1.18E-08 | 3.66E-07 | 9.812 | <a href="#">13011</a>  | cystatin F (leukocystatin)                       |
| Cstf2  | 0.655   | 8.927 | 8.375  | 1.95E-08 | 5.68E-07 | 9.301 | <a href="#">108062</a> | cleavage stimulation factor 3 pre-RNA subunit 2  |
| Cstf3  | 0.7002  | 7.965 | 10.82  | 1.72E-10 | 1.08E-08 | 14.09 | <a href="#">228410</a> | cleavage stimulation factor 3 pre-RNA subunit 3  |
| Ctc1   | 0.5847  | 8.579 | 8.841  | 7.47E-09 | 2.50E-07 | 10.27 | <a href="#">68964</a>  | CTS telomere maintenance complex component 1     |
| Ctps   | 0.9373  | 7.83  | 10.24  | 4.92E-10 | 2.55E-08 | 13.03 | <a href="#">51797</a>  | cytidine 5-triphosphate synthase                 |
| Ctss   | -0.9437 | 10.22 | -8.561 | 1.33E-08 | 4.04E-07 | 9.692 | <a href="#">13040</a>  | cathepsin S                                      |
| Ctsw   | -2.383  | 8.275 | -11.76 | 3.35E-11 | 2.76E-09 | 15.74 | <a href="#">13041</a>  | cathepsin W                                      |
| Cxcl10 | -0.9311 | 6.694 | -8.441 | 1.70E-08 | 5.04E-07 | 9.439 | <a href="#">15945</a>  | chemokine (C-X-C motif) ligand 10                |

|        |         |       |        |          |          |       |                        |                                                     |
|--------|---------|-------|--------|----------|----------|-------|------------------------|-----------------------------------------------------|
| Cxcl16 | -1.805  | 7.091 | -10.66 | 2.27E-10 | 1.34E-08 | 13.8  | <a href="#">66102</a>  | chemokine (C-X-C motif) ligand 16                   |
| Cxcl9  | -2.092  | 7.62  | -8.291 | 2.33E-08 | 6.56E-07 | 9.123 | <a href="#">17329</a>  | chemokine (C-X-C motif) ligand 9                    |
| Cxcr3  | -1.794  | 8.081 | -11.85 | 2.88E-11 | 2.42E-09 | 15.89 | <a href="#">12766</a>  | chemokine (C-X-C motif) receptor 3                  |
| Cxcr4  | 1.119   | 10.71 | 8.096  | 3.52E-08 | 9.45E-07 | 8.703 | <a href="#">12767</a>  | chemokine (C-X-C motif) receptor 4                  |
| Cxcr5  | -2.449  | 7.952 | -9.433 | 2.30E-09 | 9.39E-08 | 11.47 | <a href="#">12145</a>  | chemokine (C-X-C motif) receptor 5                  |
| Cxcr6  | -1.821  | 6.373 | -9.347 | 2.72E-09 | 1.08E-07 | 11.3  | <a href="#">80901</a>  | chemokine (C-X-C motif) receptor 6                  |
| Cxx1c  | -1.103  | 7.277 | -8.682 | 1.03E-08 | 3.29E-07 | 9.945 | <a href="#">72865</a>  | CAAX box 1C                                         |
| Cyld   | -0.6924 | 9.051 | -9.374 | 2.58E-09 | 1.03E-07 | 11.35 | <a href="#">74256</a>  | cylindromatosis (turban tumor syndrome)             |
| Cyp2s1 | -1.257  | 7.629 | -8.947 | 6.03E-09 | 2.11E-07 | 10.49 | <a href="#">74134</a>  | cytochrome P450 family 2 subfamily s polypeptide 1  |
| Cyp51  | 0.8646  | 7.564 | 9.423  | 2.34E-09 | 9.49E-08 | 11.45 | <a href="#">13121</a>  | cytochrome P450 family 51                           |
| Daam1  | -1.072  | 7.092 | -9.62  | 1.60E-09 | 6.86E-08 | 11.83 | <a href="#">208846</a> | dishevelled associated activator of morphogenesis 1 |
| Dapk1  | -1.167  | 7.164 | -11.12 | 1.00E-10 | 6.76E-09 | 14.63 | <a href="#">69635</a>  | death associated protein kinase 1                   |
| Dapl1  | -4.048  | 8.748 | -18.19 | 3.86E-15 | 2.25E-12 | 24.74 | <a href="#">76747</a>  | death associated protein-like 1                     |
| Dbf4   | 1.513   | 8.334 | 16.19  | 4.68E-14 | 1.37E-11 | 22.29 | <a href="#">27214</a>  | DBF4 homolog (S. cerevisiae)                        |
| Dbp    | -1.092  | 8.099 | -11.18 | 9.06E-11 | 6.25E-09 | 14.73 | <a href="#">13170</a>  | D site albumin promoter binding protein             |
| Dck    | 1.665   | 8.783 | 16.63  | 2.64E-14 | 9.04E-12 | 22.86 | <a href="#">13178</a>  | deoxycytidine kinase                                |
| Dctpp1 | 0.7558  | 8.727 | 12.91  | 5.12E-12 | 5.71E-10 | 17.62 | <a href="#">66422</a>  | dCTP pyrophosphatase 1                              |



|         |         |       |        |          |          |       |                        |                                                         |
|---------|---------|-------|--------|----------|----------|-------|------------------------|---------------------------------------------------------|
| Ddah2   | 1.032   | 7.494 | 8.103  | 3.47E-08 | 9.32E-07 | 8.719 | <a href="#">51793</a>  | dimethylarginine dimethylaminohydrolase 2               |
| Ddc     | 2.595   | 6.72  | 16.23  | 4.46E-14 | 1.35E-11 | 22.34 | <a href="#">13195</a>  | dopa decarboxylase                                      |
| Ddias   | 1.138   | 6.94  | 14.68  | 3.68E-13 | 6.88E-11 | 20.25 | <a href="#">74041</a>  | DNA damage-induced apoptosis suppressor                 |
| Ddr1    | -0.9271 | 7.076 | -8.163 | 3.06E-08 | 8.31E-07 | 8.847 | <a href="#">12305</a>  | discoidin domain receptor family member 1               |
| Ddx1    | 0.719   | 9.906 | 8.674  | 1.05E-08 | 3.33E-07 | 9.928 | <a href="#">104721</a> | DEAD (Asp-Glu-Ala-Asp) box polypeptide 1                |
| Ddx39   | 0.858   | 8.479 | 10.21  | 5.19E-10 | 2.66E-08 | 12.97 | <a href="#">68278</a>  | DEAD (Asp-Glu-Ala-Asp) box polypeptide 39               |
| Dennd2d | -1.957  | 8.908 | -11.35 | 6.76E-11 | 4.88E-09 | 15.03 | <a href="#">72121</a>  | DENN/MADD domain containing 2D                          |
| Depdc1a | 1.933   | 5.638 | 16.7   | 2.43E-14 | 8.64E-12 | 22.94 | <a href="#">76131</a>  | DEP domain containing 1a                                |
| Depdc1b | 1.396   | 6.883 | 12.46  | 1.05E-11 | 1.04E-09 | 16.9  | <a href="#">218581</a> | DEP domain containing 1B                                |
| Depdc7  | 2.743   | 6.664 | 22.19  | 5.12E-17 | 1.14E-13 | 28.91 | <a href="#">211896</a> | DEP domain containing 7                                 |
| Dera    | 0.6984  | 9.216 | 11.15  | 9.62E-11 | 6.54E-09 | 14.67 | <a href="#">232449</a> | 2-deoxyribose-5-phosphate aldolase homolog (C. elegans) |
| Desi1   | 0.7783  | 10.14 | 10.21  | 5.24E-10 | 2.67E-08 | 12.96 | <a href="#">28075</a>  | desumoylating isopeptidase 1                            |
| Dhfr    | 1.717   | 7.577 | 14.8   | 3.10E-13 | 5.99E-11 | 20.42 | <a href="#">13361</a>  | dihydrofolate reductase                                 |
| Diap3   | 1.889   | 7.098 | 10.04  | 7.20E-10 | 3.53E-08 | 12.64 | <a href="#">56419</a>  | diaphanous homolog 3 (Drosophila)                       |
| Dirc2   | -1.049  | 8.806 | -8.05  | 3.89E-08 | 1.03E-06 | 8.604 | <a href="#">224132</a> | disrupted in renal carcinoma 2 (human)                  |
| Dlg5    | -0.5215 | 6.977 | -8.904 | 6.58E-09 | 2.26E-07 | 10.4  | <a href="#">71228</a>  | discs large homolog 5 (Drosophila)                      |
| Dlgap5  | 1.854   | 7.956 | 15.28  | 1.57E-13 | 3.45E-11 | 21.09 | <a href="#">218977</a> | discs large (Drosophila) homolog-associated protein 5   |

|         |         |       |        |          |          |       |                        |                                                                                                             |
|---------|---------|-------|--------|----------|----------|-------|------------------------|-------------------------------------------------------------------------------------------------------------|
| Dna2    | 1.536   | 7.918 | 15.31  | 1.51E-13 | 3.36E-11 | 21.13 | <a href="#">327762</a> | DNA replication helicase 2 homolog (yeast)                                                                  |
| Dnajb2  | -0.7903 | 7.644 | -8.79  | 8.28E-09 | 2.71E-07 | 10.17 | <a href="#">56812</a>  | DnaJ (Hsp40) homolog subfamily B member 2                                                                   |
| Dnajc2  | 0.5029  | 8.331 | 9.623  | 1.59E-09 | 6.82E-08 | 11.84 | <a href="#">22791</a>  | DnaJ (Hsp40) homolog subfamily C member 2                                                                   |
| Dnajc21 | 0.903   | 8.419 | 10.96  | 1.33E-10 | 8.63E-09 | 14.35 | <a href="#">78244</a>  | DnaJ (Hsp40) homolog subfamily C member 21                                                                  |
| Dnmbp   | -0.594  | 7.493 | -8.309 | 2.24E-08 | 6.37E-07 | 9.16  | <a href="#">71972</a>  | dynamitin binding protein                                                                                   |
| Dnmt1   | 0.8185  | 9.694 | 8.634  | 1.14E-08 | 3.57E-07 | 9.845 | <a href="#">13433</a>  | DNA methyltransferase (cytosine-5) 1                                                                        |
| Dnph1   | 0.9289  | 7.559 | 11.73  | 3.55E-11 | 2.86E-09 | 15.68 | <a href="#">381101</a> | 2-deoxynucleoside 5-phosphate N-hydrolase 1                                                                 |
| Dpagt1  | 0.7374  | 8.425 | 9.608  | 1.63E-09 | 7.00E-08 | 11.81 | <a href="#">13478</a>  | dolichyl-phosphate (UDP-N-acetylglucosamine) acetylglucosaminophosphotransferase 1 (GlcNAc-1-P transferase) |
| Dpp4    | 1.342   | 9.968 | 9.001  | 5.41E-09 | 1.95E-07 | 10.6  | <a href="#">13482</a>  | dipeptidylpeptidase 4                                                                                       |
| Dpp7    | -0.7116 | 7.812 | -9.701 | 1.37E-09 | 6.02E-08 | 11.99 | <a href="#">83768</a>  | dipeptidylpeptidase 7                                                                                       |
| Dscam   | -0.9151 | 6.506 | -8.67  | 1.06E-08 | 3.35E-07 | 9.919 | <a href="#">13508</a>  | Down syndrome cell adhesion molecule                                                                        |
| Dscc1   | 1.369   | 6.429 | 11.11  | 1.03E-10 | 6.93E-09 | 14.6  | <a href="#">72107</a>  | defective in sister chromatid cohesion 1 homolog (S. cerevisiae)                                            |
| Dse     | -1.493  | 8.297 | -8.558 | 1.34E-08 | 4.06E-07 | 9.686 | <a href="#">212898</a> | dermatan sulfate epimerase                                                                                  |
| Dsn1    | 1.11    | 7.707 | 10.41  | 3.58E-10 | 1.96E-08 | 13.35 | <a href="#">66934</a>  | DSN1 MIND kinetochore complex component homolog (S. cerevisiae)                                             |

|         |         |       |        |          |          |       |                        |                                                      |
|---------|---------|-------|--------|----------|----------|-------|------------------------|------------------------------------------------------|
| Dtl     | 2.177   | 7.766 | 18.26  | 3.56E-15 | 2.14E-12 | 24.82 | <a href="#">76843</a>  | denticleless homolog (Drosophila)                    |
| Dtx1    | -2.157  | 9.427 | -11.99 | 2.29E-11 | 1.97E-09 | 16.12 | <a href="#">14357</a>  | deltex 1 homolog (Drosophila)                        |
| Dusp10  | -1.461  | 8.831 | -8.205 | 2.80E-08 | 7.69E-07 | 8.937 | <a href="#">63953</a>  | dual specificity phosphatase 10                      |
| Dusp6   | 1.325   | 10.63 | 12.76  | 6.56E-12 | 6.99E-10 | 17.37 | <a href="#">67603</a>  | dual specificity phosphatase 6                       |
| Dut     | 0.849   | 7.732 | 12.79  | 6.24E-12 | 6.71E-10 | 17.42 | <a href="#">110074</a> | deoxyuridine triphosphatase                          |
| Dync2h1 | 0.9387  | 6.622 | 9.431  | 2.31E-09 | 9.39E-08 | 11.46 | <a href="#">110350</a> | dynein cytoplasmic 2 heavy chain 1                   |
| E2f1    | 1.007   | 7.625 | 9.378  | 2.56E-09 | 1.03E-07 | 11.36 | <a href="#">13555</a>  | E2F transcription factor 1                           |
| E2f2    | 1.143   | 8.127 | 8.178  | 2.96E-08 | 8.08E-07 | 8.879 | <a href="#">242705</a> | E2F transcription factor 2                           |
| E2f3    | 1.414   | 7.769 | 17.5   | 8.89E-15 | 4.22E-12 | 23.93 | <a href="#">13557</a>  | E2F transcription factor 3                           |
| E2f7    | 1.463   | 7.329 | 11.53  | 4.94E-11 | 3.74E-09 | 15.34 | <a href="#">52679</a>  | E2F transcription factor 7                           |
| E2f8    | 2.121   | 8.105 | 14.65  | 3.83E-13 | 7.05E-11 | 20.21 | <a href="#">108961</a> | E2F transcription factor 8                           |
| Ebf1    | 1.259   | 9.281 | 9.194  | 3.68E-09 | 1.40E-07 | 10.99 | <a href="#">13591</a>  | early B cell factor 1                                |
| Ect2    | 2.202   | 8.1   | 20.34  | 3.44E-16 | 4.58E-13 | 27.09 | <a href="#">13605</a>  | ect2 oncogene                                        |
| Eef2k   | 1.632   | 8.331 | 16.54  | 2.98E-14 | 9.81E-12 | 22.74 | <a href="#">13631</a>  | eukaryotic elongation factor-2 kinase                |
| Efnb1   | -0.7012 | 7.274 | -9.108 | 4.36E-09 | 1.62E-07 | 10.82 | <a href="#">13641</a>  | ephrin B1                                            |
| Eid2    | -0.502  | 7.296 | -9.566 | 1.77E-09 | 7.52E-08 | 11.73 | <a href="#">386655</a> | EP300 interacting inhibitor of differentiation 2     |
| Eif2a   | 0.7117  | 9.188 | 8.569  | 1.31E-08 | 3.99E-07 | 9.709 | <a href="#">229317</a> | eukaryotic translation initiation factor 2A          |
| Eif3b   | 0.6184  | 10.31 | 8.159  | 3.08E-08 | 8.36E-07 | 8.84  | <a href="#">27979</a>  | eukaryotic translation initiation factor 3 subunit B |
| Eif4e   | 0.6456  | 9.259 | 11.76  | 3.37E-11 | 2.77E-09 | 15.73 | <a href="#">13684</a>  | eukaryotic translation initiation factor 4E          |
| Eif4h   | 0.5904  | 10.57 | 8.031  | 4.04E-08 | 1.07E-06 | 8.564 | <a href="#">22384</a>  | eukaryotic translation initiation factor 4H          |

|           |        |       |        |          |          |       |                        |                                                                       |
|-----------|--------|-------|--------|----------|----------|-------|------------------------|-----------------------------------------------------------------------|
| Ell3      | -1.539 | 7.527 | -8.892 | 6.74E-09 | 2.31E-07 | 10.38 | <a href="#">269344</a> | elongation factor RNA polymerase II-like 3                            |
| Elof1     | 0.8249 | 8.062 | 8.512  | 1.47E-08 | 4.42E-07 | 9.59  | <a href="#">66126</a>  | elongation factor 1 homolog (ELF1 <i>S. cerevisiae</i> )              |
| Elovl7    | -0.897 | 5.894 | -8.557 | 1.34E-08 | 4.07E-07 | 9.684 | <a href="#">74559</a>  | ELOVL family member 7 elongation of long chain fatty acids (yeast)    |
| Eme1      | 1.508  | 7.151 | 15.09  | 2.07E-13 | 4.32E-11 | 20.82 | <a href="#">268465</a> | essential meiotic endonuclease 1 homolog 1 ( <i>S. pombe</i> )        |
| Emp1      | 1.792  | 8.443 | 8.99   | 5.53E-09 | 1.97E-07 | 10.58 | <a href="#">13730</a>  | epithelial membrane protein 1                                         |
| Eng       | 1.772  | 8.949 | 8.28   | 2.39E-08 | 6.70E-07 | 9.098 | <a href="#">13805</a>  | endoglin                                                              |
| Enkd1     | 0.7787 | 7.24  | 10     | 7.72E-10 | 3.75E-08 | 12.57 | <a href="#">102124</a> | enkurin domain containing 1                                           |
| Eno3      | -1.065 | 8.657 | -8.783 | 8.41E-09 | 2.75E-07 | 10.15 | <a href="#">13808</a>  | enolase 3 beta muscle                                                 |
| Enpp1     | -1.723 | 8.228 | -8.007 | 4.26E-08 | 1.11E-06 | 8.511 | <a href="#">18605</a>  | ectonucleotide pyrophosphatase/phosphodiesterase 1                    |
| Enpp4     | -1.414 | 7.929 | -14.53 | 4.54E-13 | 8.04E-11 | 20.04 | <a href="#">224794</a> | ectonucleotide pyrophosphatase/phosphodiesterase 4                    |
| Enpp5     | -1.531 | 7.143 | -9.589 | 1.69E-09 | 7.23E-08 | 11.77 | <a href="#">83965</a>  | ectonucleotide pyrophosphatase/phosphodiesterase 5                    |
| Eogt      | -0.921 | 7.855 | -9.972 | 8.15E-10 | 3.94E-08 | 12.51 | <a href="#">101351</a> | EGF domain-specific O-linked N-acetylglucosamine (GlcNAc) transferase |
| Eomes     | -1.58  | 7.254 | -10.99 | 1.28E-10 | 8.35E-09 | 14.39 | <a href="#">13813</a>  | eomesodermin homolog ( <i>Xenopus laevis</i> )                        |
| Epb4.1l4b | 1.38   | 6.929 | 8.697  | 1.00E-08 | 3.21E-07 | 9.975 | <a href="#">54357</a>  | erythrocyte protein band 4.1-like 4b                                  |

|          |         |       |        |          |          |       |                        |                                                                                           |
|----------|---------|-------|--------|----------|----------|-------|------------------------|-------------------------------------------------------------------------------------------|
| Epb4.1I5 | 1.535   | 6.962 | 11.93  | 2.51E-11 | 2.13E-09 | 16.02 | <a href="#">226352</a> | erythrocyte protein band 4.1-like 5                                                       |
| Epha2    | 1.897   | 7.361 | 13.02  | 4.32E-12 | 4.95E-10 | 17.79 | <a href="#">13836</a>  | Eph receptor A2                                                                           |
| Ephx1    | -1.704  | 8.895 | -8.867 | 7.10E-09 | 2.41E-07 | 10.33 | <a href="#">13849</a>  | epoxide hydrolase 1 microsomal                                                            |
| Ercc6l   | 1.162   | 6.999 | 13.03  | 4.27E-12 | 4.91E-10 | 17.8  | <a href="#">236930</a> | excision repair cross-complementing rodent repair deficiency complementation group 6 like |
| Erg      | 2.809   | 8.049 | 20.29  | 3.61E-16 | 4.58E-13 | 27.04 | <a href="#">13876</a>  | avian erythroblastosis virus E-26 (v-ets) oncogene related                                |
| Erh      | 0.9664  | 9.067 | 11.15  | 9.65E-11 | 6.55E-09 | 14.67 | <a href="#">13877</a>  | enhancer of rudimentary homolog (Drosophila)                                              |
| Esco2    | 2.307   | 7.525 | 10.8   | 1.79E-10 | 1.12E-08 | 14.05 | <a href="#">71988</a>  | establishment of cohesion 1 homolog 2 (S. cerevisiae)                                     |
| Espl1    | 1.651   | 7.183 | 13.55  | 1.93E-12 | 2.55E-10 | 18.6  | <a href="#">105988</a> | extra spindle pole bodies 1 (S. cerevisiae)                                               |
| Esyt2    | -0.9812 | 9.355 | -9.768 | 1.20E-09 | 5.44E-08 | 12.12 | <a href="#">52635</a>  | extended synaptotagmin-like protein 2                                                     |
| Ethe1    | 0.8406  | 7.516 | 9.287  | 3.06E-09 | 1.19E-07 | 11.18 | <a href="#">66071</a>  | ethylmalonic encephalopathy 1                                                             |
| Etv5     | 1.928   | 7.733 | 13.5   | 2.07E-12 | 2.69E-10 | 18.53 | <a href="#">104156</a> | ets variant 5                                                                             |
| Exo1     | 1.762   | 7.168 | 17.4   | 1.01E-14 | 4.48E-12 | 23.8  | <a href="#">26909</a>  | exonuclease 1                                                                             |
| Exoc6b   | -1.391  | 8.05  | -14.15 | 7.81E-13 | 1.20E-10 | 19.5  | <a href="#">75914</a>  | exocyst complex component 6B                                                              |
| Exosc9   | 0.5524  | 8.743 | 8.151  | 3.13E-08 | 8.48E-07 | 8.822 | <a href="#">50911</a>  | exosome component 9                                                                       |
| Eya2     | -0.927  | 6.655 | -10.35 | 4.04E-10 | 2.17E-08 | 13.22 | <a href="#">14049</a>  | eyes absent 2 homolog (Drosophila)                                                        |
| Ezh2     | 1.708   | 9.703 | 17.78  | 6.31E-15 | 3.30E-12 | 24.26 | <a href="#">14056</a>  | enhancer of zeste homolog 2 (Drosophila)                                                  |
| F2r      | -1.203  | 8.181 | -19.04 | 1.44E-15 | 1.14E-12 | 25.7  | <a href="#">14062</a>  | coagulation factor II (thrombin) receptor                                                 |

|         |         |       |        |          |          |       |                        |                                              |
|---------|---------|-------|--------|----------|----------|-------|------------------------|----------------------------------------------|
| Faah    | -1.644  | 7.739 | -10.27 | 4.69E-10 | 2.46E-08 | 13.07 | <a href="#">14073</a>  | fatty acid amide hydrolase                   |
| Fam102a | -1.5    | 9.671 | -9.783 | 1.17E-09 | 5.31E-08 | 12.15 | <a href="#">98952</a>  | family with sequence similarity 102 member A |
| Fam105a | -1.956  | 8.253 | -9.719 | 1.32E-09 | 5.87E-08 | 12.03 | <a href="#">223433</a> | family with sequence similarity 105 member A |
| Fam129a | -1.413  | 7.886 | -8.113 | 3.40E-08 | 9.16E-07 | 8.74  | <a href="#">63913</a>  | family with sequence similarity 129 member A |
| Fam169b | -2.223  | 8.499 | -11.32 | 7.15E-11 | 5.11E-09 | 14.97 | <a href="#">434197</a> | family with sequence similarity 169 member B |
| Fam198a | 1.112   | 6.703 | 9.11   | 4.35E-09 | 1.62E-07 | 10.82 | <a href="#">245050</a> | family with sequence similarity 198 member A |
| Fam216a | 0.6789  | 8.035 | 10.71  | 2.08E-10 | 1.26E-08 | 13.9  | <a href="#">68948</a>  | family with sequence similarity 216 member A |
| Fam26f  | -1.474  | 7.317 | -10.27 | 4.68E-10 | 2.46E-08 | 13.07 | <a href="#">215900</a> | family with sequence similarity 26 member F  |
| Fam46c  | -1.906  | 9.647 | -8.383 | 1.92E-08 | 5.60E-07 | 9.318 | <a href="#">74645</a>  | family with sequence similarity 46 member C  |
| Fam49a  | -0.8522 | 9.621 | -7.984 | 4.47E-08 | 1.16E-06 | 8.462 | <a href="#">76820</a>  | family with sequence similarity 49 member A  |
| Fam60a  | 0.7062  | 10.36 | 9.574  | 1.75E-09 | 7.42E-08 | 11.74 | <a href="#">56306</a>  | family with sequence similarity 60 member A  |
| Fam64a  | 1.893   | 7.49  | 14.69  | 3.60E-13 | 6.77E-11 | 20.27 | <a href="#">109212</a> | family with sequence similarity 64 member A  |
| Fam65a  | 0.607   | 8.389 | 8.474  | 1.59E-08 | 4.75E-07 | 9.509 | <a href="#">75687</a>  | family with sequence similarity 65 member A  |
| Fam69a  | -1.175  | 9.614 | -11.55 | 4.75E-11 | 3.64E-09 | 15.38 | <a href="#">67266</a>  | family with sequence similarity 69 member A  |
| Fam72a  | 1.324   | 5.292 | 10.41  | 3.61E-10 | 1.96E-08 | 13.34 | <a href="#">108900</a> | family with sequence similarity 72 member A  |

|        |         |       |        |          |          |       |                        |                                             |
|--------|---------|-------|--------|----------|----------|-------|------------------------|---------------------------------------------|
| Fam83d | 1.02    | 6.49  | 12.52  | 9.55E-12 | 9.62E-10 | 17    | <a href="#">71878</a>  | family with sequence similarity 83 member D |
| Fancb  | 0.8412  | 6.725 | 8.167  | 3.03E-08 | 8.25E-07 | 8.856 | <a href="#">237211</a> | Fanconi anemia complementation group B      |
| Fancd2 | 1.586   | 7.096 | 13.85  | 1.23E-12 | 1.76E-10 | 19.05 | <a href="#">211651</a> | Fanconi anemia complementation group D2     |
| Fanci  | 1.079   | 7.008 | 9.299  | 2.99E-09 | 1.17E-07 | 11.2  | <a href="#">208836</a> | Fanconi anemia complementation group I      |
| Fancm  | 0.9832  | 7.687 | 10.6   | 2.54E-10 | 1.46E-08 | 13.69 | <a href="#">104806</a> | Fanconi anemia complementation group M      |
| Farp2  | -0.7524 | 6.473 | -8.904 | 6.58E-09 | 2.26E-07 | 10.4  | <a href="#">227377</a> | FERM RhoGEF and pleckstrin domain protein 2 |
| Fas    | -1.433  | 6.886 | -10.8  | 1.79E-10 | 1.12E-08 | 14.05 | <a href="#">14102</a>  | Fas (TNF receptor superfamily member 6)     |
| Fbxl19 | 0.7937  | 7.555 | 10.9   | 1.49E-10 | 9.60E-09 | 14.23 | <a href="#">233902</a> | F-box and leucine-rich repeat protein 19    |
| Fbxl21 | -0.5186 | 5.218 | -8.295 | 2.31E-08 | 6.52E-07 | 9.131 | <a href="#">213311</a> | F-box and leucine-rich repeat protein 21    |
| Fbxo5  | 1.241   | 8.144 | 10.89  | 1.51E-10 | 9.71E-09 | 14.22 | <a href="#">67141</a>  | F-box protein 5                             |
| Fbxw4  | -0.6343 | 8.217 | -8.662 | 1.08E-08 | 3.39E-07 | 9.904 | <a href="#">30838</a>  | F-box and WD-40 domain protein 4            |
| Fcgrt  | -1.466  | 8.657 | -13.72 | 1.48E-12 | 2.06E-10 | 18.87 | <a href="#">14132</a>  | Fc receptor IgG alpha chain transporter     |
| Fchsd2 | -1.476  | 9.638 | -12.31 | 1.35E-11 | 1.28E-09 | 16.65 | <a href="#">207278</a> | FCH and double SH3 domains 2                |
| Fcrl6  | 1.563   | 6.548 | 11.18  | 9.09E-11 | 6.25E-09 | 14.73 | <a href="#">677296</a> | Fc receptor-like 6                          |
| Fen1   | 1.132   | 8.041 | 9.595  | 1.68E-09 | 7.18E-08 | 11.79 | <a href="#">14156</a>  | flap structure specific endonuclease 1      |
| Fgd6   | 1.163   | 7.469 | 12.02  | 2.17E-11 | 1.89E-09 | 16.17 | <a href="#">13998</a>  | FYVE RhoGEF and PH domain containing 6      |

|         |        |       |        |          |          |       |                        |                                                                                     |
|---------|--------|-------|--------|----------|----------|-------|------------------------|-------------------------------------------------------------------------------------|
| Fignl1  | 1.466  | 6.241 | 20.61  | 2.58E-16 | 3.82E-13 | 27.36 | <a href="#">60530</a>  | fidgetin-like 1                                                                     |
| Flt3    | -1.254 | 7.511 | -10.85 | 1.64E-10 | 1.04E-08 | 14.13 | <a href="#">14255</a>  | FMS-like tyrosine kinase 3                                                          |
| Flt3l   | -1.234 | 8.44  | -8.874 | 6.99E-09 | 2.38E-07 | 10.34 | <a href="#">14256</a>  | FMS-like tyrosine kinase 3 ligand                                                   |
| Fmnl2   | -1.392 | 6.939 | -10.45 | 3.33E-10 | 1.84E-08 | 13.42 | <a href="#">71409</a>  | formin-like 2                                                                       |
| Fmo5    | -1.178 | 7.676 | -10.52 | 2.95E-10 | 1.65E-08 | 13.54 | <a href="#">14263</a>  | flavin containing monooxygenase 5                                                   |
| Foxm1   | 1.678  | 7.658 | 14.17  | 7.68E-13 | 1.19E-10 | 19.52 | <a href="#">14235</a>  | forkhead box M1                                                                     |
| Frg1    | 0.7566 | 9.107 | 16.93  | 1.80E-14 | 6.90E-12 | 23.23 | <a href="#">14300</a>  | FSHD region gene 1                                                                  |
| Fscn1   | -2.527 | 8.909 | -12.6  | 8.48E-12 | 8.72E-10 | 17.11 | <a href="#">14086</a>  | fascin homolog 1 actin bundling protein (Strongylocentrotus purpuratus)             |
| Fut8    | 1.083  | 8.734 | 8.857  | 7.24E-09 | 2.44E-07 | 10.31 | <a href="#">53618</a>  | fucosyltransferase 8                                                                |
| Fxn     | 0.5866 | 7.956 | 8.422  | 1.77E-08 | 5.22E-07 | 9.399 | <a href="#">14297</a>  | frataxin                                                                            |
| G2e3    | 0.8535 | 7.667 | 8.685  | 1.03E-08 | 3.28E-07 | 9.95  | <a href="#">217558</a> | G2/M-phase specific E3 ubiquitin ligase                                             |
| Galm    | -1.512 | 6.916 | -8.803 | 8.07E-09 | 2.66E-07 | 10.2  | <a href="#">319625</a> | galactose mutarotase                                                                |
| Galnt14 | 1.828  | 6.305 | 14.48  | 4.84E-13 | 8.35E-11 | 19.98 | <a href="#">71685</a>  | UDP-N-acetyl-alpha-D-galactosamine:polypeptide N-acetylgalactosaminyltransferase 14 |
| Gar1    | 0.8156 | 8.783 | 10.78  | 1.85E-10 | 1.15E-08 | 14.01 | <a href="#">68147</a>  | GAR1 ribonucleoprotein homolog (yeast)                                              |
| Gas2l3  | 3.36   | 8.197 | 18.28  | 3.49E-15 | 2.14E-12 | 24.84 | <a href="#">237436</a> | growth arrest-specific 2 like 3                                                     |
| Gbp8    | -1.587 | 7.901 | -8.807 | 8.02E-09 | 2.65E-07 | 10.2  | <a href="#">76074</a>  | guanylate-binding protein 8                                                         |
| Gclc    | 1.263  | 9.526 | 11.55  | 4.80E-11 | 3.67E-09 | 15.37 | <a href="#">14629</a>  | glutamate-cysteine ligase catalytic subunit                                         |
| Gemin6  | 0.5588 | 7.475 | 9.02   | 5.21E-09 | 1.88E-07 | 10.64 | <a href="#">67242</a>  | gem (nuclear organelle) associated protein 6                                        |



|         |         |       |        |          |          |       |                           |                                                                          |
|---------|---------|-------|--------|----------|----------|-------|---------------------------|--------------------------------------------------------------------------|
| Gen1    | 1.74    | 7.151 | 17.27  | 1.18E-14 | 4.99E-12 | 23.65 | <a href="#">209334</a>    | Gen homolog 1 endonuclease (Drosophila)                                  |
| Gimap7  | -1.422  | 7.689 | -8.345 | 2.08E-08 | 6.00E-07 | 9.237 | <a href="#">231932</a>    | GTPase IMAP family member 7                                              |
| Gins1   | 1.984   | 7.211 | 21.27  | 1.29E-16 | 2.17E-13 | 28.03 | <a href="#">69270</a>     | GINs complex subunit 1 (Psf1 homolog)                                    |
| Gins2   | 1.148   | 8.067 | 11.7   | 3.68E-11 | 2.93E-09 | 15.64 | <a href="#">272551</a>    | GINs complex subunit 2 (Psf2 homolog)                                    |
| Gltf    | -0.5571 | 10.3  | -9.078 | 4.64E-09 | 1.71E-07 | 10.76 | <a href="#">56356</a>     | glycolipid transfer protein                                              |
| Gm10212 | -1.248  | 7.004 | -8.202 | 2.81E-08 | 7.73E-07 | 8.931 | ---                       | predicted pseudogene 10212                                               |
| Gm10384 | 2.262   | 6.224 | 9.413  | 2.39E-09 | 9.65E-08 | 11.43 | <a href="#">100038735</a> | predicted gene 10384                                                     |
| Gm10673 | -2.636  | 6.734 | -15.38 | 1.39E-13 | 3.14E-11 | 21.22 | <a href="#">100038559</a> | predicted gene 10673                                                     |
| Gm12260 | 1.252   | 9.119 | 11.25  | 8.03E-11 | 5.64E-09 | 14.85 | ---                       | predicted gene 12260                                                     |
| Gm12387 | 1.836   | 5.898 | 9.304  | 2.96E-09 | 1.16E-07 | 11.21 | ---                       | predicted gene 12387                                                     |
| Gm12474 | -1.184  | 7.295 | -8.416 | 1.80E-08 | 5.27E-07 | 9.386 | <a href="#">545557</a>    | predicted gene 12474                                                     |
| Gm12957 | 1.489   | 9.153 | 8.106  | 3.45E-08 | 9.28E-07 | 8.726 | ---                       | predicted gene 12957                                                     |
| Gm13160 | 1.465   | 10.5  | 13.44  | 2.28E-12 | 2.92E-10 | 18.43 | ---                       | predicted gene 13160                                                     |
| Gm13212 | -1.072  | 5.724 | -9.763 | 1.21E-09 | 5.48E-08 | 12.11 | <a href="#">433801</a>    | predicted gene 13212                                                     |
| Gm13238 | 0.5202  | 9.823 | 8.778  | 8.49E-09 | 2.77E-07 | 10.14 | <a href="#">236069</a>    | carnitine deficiency-associated gene expressed in ventricle 3 pseudogene |
| Gm13310 | 1.034   | 7.729 | 9.505  | 2.00E-09 | 8.29E-08 | 11.61 | ---                       | predicted gene 13310                                                     |
| Gm14150 | 0.8938  | 10.86 | 8.779  | 8.48E-09 | 2.77E-07 | 10.15 | ---                       | predicted gene 14150                                                     |
| Gm15697 | 1.977   | 5.814 | 9.726  | 1.30E-09 | 5.81E-08 | 12.04 | ---                       | predicted gene 15697                                                     |
| Gm16379 | 0.8738  | 10.95 | 8.064  | 3.77E-08 | 1.01E-06 | 8.635 | ---                       | predicted pseudogene 16379                                               |
| Gm16494 | 0.9817  | 10.68 | 11.45  | 5.65E-11 | 4.22E-09 | 15.21 | ---                       | predicted gene 16494                                                     |
| Gm17296 | 2.124   | 8.308 | 24.17  | 7.75E-18 | 2.51E-14 | 30.69 | <a href="#">212728</a>    | predicted gene 17296                                                     |
| Gm22303 | 1.287   | 8.074 | 10.61  | 2.53E-10 | 1.46E-08 | 13.7  | ---                       | predicted gene 22303                                                     |
| Gm22806 | 1.355   | 6.526 | 10.53  | 2.87E-10 | 1.62E-08 | 13.57 | ---                       | predicted gene 22806                                                     |
| Gm23406 | 1.159   | 5.189 | 8.95   | 5.99E-09 | 2.10E-07 | 10.5  | ---                       | predicted gene 23406                                                     |

|         |         |       |        |          |          |       |                        |                                                         |
|---------|---------|-------|--------|----------|----------|-------|------------------------|---------------------------------------------------------|
| Gm23421 | 1.212   | 4.43  | 8.776  | 8.53E-09 | 2.78E-07 | 10.14 | ---                    | predicted gene 23421                                    |
| Gm24357 | 0.986   | 10.53 | 8.094  | 3.54E-08 | 9.48E-07 | 8.699 | ---                    | predicted gene 24357                                    |
| Gm24412 | 1.085   | 9.027 | 11.59  | 4.46E-11 | 3.44E-09 | 15.45 | ---                    | predicted gene 24412                                    |
| Gm25188 | 0.857   | 9.207 | 10.01  | 7.53E-10 | 3.67E-08 | 12.6  | ---                    | predicted gene 25188                                    |
| Gm3851  | 0.6045  | 11.42 | 8.99   | 5.53E-09 | 1.97E-07 | 10.58 | ---                    | predicted gene 3851                                     |
| Gm525   | 2.462   | 8.399 | 10.03  | 7.30E-10 | 3.58E-08 | 12.63 | <a href="#">217071</a> | predicted gene 525                                      |
| Gm527   | -0.9968 | 6.933 | -8.008 | 4.25E-08 | 1.11E-06 | 8.513 | <a href="#">217648</a> | predicted gene 527                                      |
| Gm6625  | 0.6858  | 10.58 | 10.05  | 7.02E-10 | 3.46E-08 | 12.67 | <a href="#">625801</a> | predicted gene 6625                                     |
| Gm6901  | 0.6731  | 9.471 | 8.772  | 8.61E-09 | 2.80E-07 | 10.13 | <a href="#">628648</a> | predicted gene 6901                                     |
| Gm8587  | 0.678   | 7.816 | 8.205  | 2.80E-08 | 7.69E-07 | 8.937 | <a href="#">667350</a> | predicted pseudogene 8587                               |
| Gm ds   | 1.167   | 8.359 | 10.07  | 6.74E-10 | 3.35E-08 | 12.71 | <a href="#">218138</a> | GDP-mannose 4 6-dehydratase                             |
| Gm nn   | 1.066   | 6.227 | 12.86  | 5.54E-12 | 6.08E-10 | 17.54 | <a href="#">57441</a>  | geminin                                                 |
| Gnb4    | 1.303   | 8.596 | 8.99   | 5.53E-09 | 1.97E-07 | 10.58 | <a href="#">14696</a>  | guanine nucleotide binding protein (G protein) beta 4   |
| Gpd1l   | 0.911   | 9.266 | 9.432  | 2.30E-09 | 9.39E-08 | 11.46 | <a href="#">333433</a> | glycerol-3-phosphate dehydrogenase 1-like               |
| Gpr146  | -1.044  | 8     | -9.22  | 3.49E-09 | 1.34E-07 | 11.04 | <a href="#">80290</a>  | G protein-coupled receptor 146                          |
| Gpr156  | -0.8866 | 6.676 | -9.58  | 1.73E-09 | 7.34E-08 | 11.76 | <a href="#">239845</a> | G protein-coupled receptor 156                          |
| Gpr183  | -1.566  | 8.699 | -8.21  | 2.76E-08 | 7.62E-07 | 8.949 | <a href="#">321019</a> | G protein-coupled receptor 183                          |
| Gpr56   | 3.336   | 9.087 | 14.49  | 4.81E-13 | 8.35E-11 | 19.98 | <a href="#">14766</a>  | G protein-coupled receptor 56                           |
| Gpr84   | 1.075   | 6.253 | 9.555  | 1.81E-09 | 7.66E-08 | 11.71 | <a href="#">80910</a>  | G protein-coupled receptor 84                           |
| Gpr97   | 3.065   | 8.424 | 15.81  | 7.68E-14 | 1.98E-11 | 21.8  | <a href="#">54672</a>  | G protein-coupled receptor 97                           |
| Gpsm2   | 1.027   | 6.971 | 8.253  | 2.52E-08 | 7.02E-07 | 9.042 | <a href="#">76123</a>  | G-protein signalling modulator 2 (AGS3-like C. elegans) |
| Gramd1b | -1.353  | 8.302 | -8.169 | 3.01E-08 | 8.21E-07 | 8.862 | <a href="#">235283</a> | GRAM domain containing 1B                               |
| Grap2   | -2.354  | 9.615 | -10.87 | 1.57E-10 | 9.98E-09 | 14.18 | <a href="#">17444</a>  | GRB2-related adaptor protein 2                          |
| Grip1   | 0.8672  | 5.907 | 9.452  | 2.22E-09 | 9.08E-08 | 11.5  | <a href="#">74053</a>  | glutamate receptor interacting protein 1                |

|          |        |       |        |          |          |       |                           |                                                                |
|----------|--------|-------|--------|----------|----------|-------|---------------------------|----------------------------------------------------------------|
| Gstk1    | -1.253 | 7.664 | -8.935 | 6.18E-09 | 2.15E-07 | 10.47 | <a href="#">76263</a>     | glutathione S-transferase kappa 1                              |
| Gtf2e2   | 0.6825 | 8.257 | 8.335  | 2.12E-08 | 6.09E-07 | 9.216 | <a href="#">68153</a>     | general transcription factor II E polypeptide 2 (beta subunit) |
| Gtf3c5   | 0.7791 | 7.935 | 19.02  | 1.48E-15 | 1.15E-12 | 25.67 | <a href="#">70239</a>     | general transcription factor IIIC polypeptide 5                |
| Gtse1    | 2.116  | 7.695 | 16.93  | 1.80E-14 | 6.90E-12 | 23.23 | <a href="#">29870</a>     | G two S phase expressed protein 1                              |
| H2-Aa    | -1.829 | 9.736 | -9.48  | 2.10E-09 | 8.62E-08 | 11.56 | <a href="#">14960</a>     | histocompatibility 2 class II antigen A alpha                  |
| H2-Ab1   | -1.787 | 10.84 | -9.331 | 2.81E-09 | 1.11E-07 | 11.26 | <a href="#">14961</a>     | histocompatibility 2 class II antigen A beta 1                 |
| H2-DMa   | -1.774 | 9.377 | -9.142 | 4.08E-09 | 1.52E-07 | 10.89 | <a href="#">14998</a>     | histocompatibility 2 class II locus DMa                        |
| H2-DMb2  | -2.487 | 9.904 | -10.58 | 2.65E-10 | 1.52E-08 | 13.65 | <a href="#">15000</a>     | histocompatibility 2 class II locus Mb2                        |
| H2-Ea-ps | -4.019 | 9.745 | -11.2  | 8.71E-11 | 6.05E-09 | 14.77 | <a href="#">100504404</a> | histocompatibility 2 class II antigen E alpha pseudogene       |
| H2-Eb1   | -2.948 | 8.856 | -9.671 | 1.45E-09 | 6.33E-08 | 11.93 | <a href="#">14969</a>     | histocompatibility 2 class II antigen E beta                   |
| H2-M2    | -2.546 | 7.764 | -11.34 | 6.85E-11 | 4.92E-09 | 15.01 | <a href="#">14990</a>     | histocompatibility 2 M region locus 2                          |
| H2afv    | 0.7572 | 9.73  | 8.674  | 1.05E-08 | 3.33E-07 | 9.928 | <a href="#">77605</a>     | H2A histone family member V                                    |
| H2afx    | 1.7    | 9.074 | 19.35  | 1.02E-15 | 8.82E-13 | 26.04 | <a href="#">15270</a>     | H2A histone family member X                                    |
| H2afy    | 0.8452 | 10.84 | 12.36  | 1.25E-11 | 1.20E-09 | 16.72 | <a href="#">26914</a>     | H2A histone family member Y                                    |
| H2afz    | 0.7923 | 10.52 | 10.38  | 3.78E-10 | 2.05E-08 | 13.29 | <a href="#">51788</a>     | H2A histone family member Z                                    |
| Haus6    | 0.8721 | 7.951 | 8.021  | 4.13E-08 | 1.09E-06 | 8.542 | <a href="#">230376</a>    | HAUS augmin-like complex subunit 6                             |

|           |         |       |        |          |          |       |                        |                                                                            |
|-----------|---------|-------|--------|----------|----------|-------|------------------------|----------------------------------------------------------------------------|
| Havcr1    | -1.593  | 6.705 | -10.06 | 6.95E-10 | 3.44E-08 | 12.68 | <a href="#">171283</a> | hepatitis A virus cellular receptor 1                                      |
| Hcrtr2    | -0.8727 | 5.275 | -8.941 | 6.10E-09 | 2.13E-07 | 10.48 | <a href="#">387285</a> | hypocretin (orexin) receptor 2                                             |
| Hdac6     | 0.5245  | 7.835 | 7.994  | 4.38E-08 | 1.14E-06 | 8.484 | <a href="#">15185</a>  | histone deacetylase 6                                                      |
| Hdac8     | 0.9923  | 7.688 | 8.624  | 1.17E-08 | 3.63E-07 | 9.823 | <a href="#">70315</a>  | histone deacetylase 8                                                      |
| Hdgfrp3   | -0.8995 | 6.315 | -10.66 | 2.28E-10 | 1.34E-08 | 13.8  | <a href="#">29877</a>  | hepatoma-derived growth factor related protein 3                           |
| Hectd2    | -0.775  | 5.281 | -10.01 | 7.63E-10 | 3.72E-08 | 12.58 | <a href="#">226098</a> | HECT domain containing 2                                                   |
| Hells     | 1.86    | 7.66  | 14.84  | 2.93E-13 | 5.72E-11 | 20.48 | <a href="#">15201</a>  | helicase lymphoid specific                                                 |
| Herc3     | -0.9392 | 8.296 | -8.32  | 2.19E-08 | 6.25E-07 | 9.184 | <a href="#">73998</a>  | hect domain and RLD 3                                                      |
| Hid1      | -1.19   | 7.556 | -8.53  | 1.42E-08 | 4.29E-07 | 9.626 | <a href="#">217310</a> | HID1 domain containing                                                     |
| Hint3     | -0.922  | 7.921 | -8.98  | 5.64E-09 | 2.00E-07 | 10.56 | <a href="#">66847</a>  | histidine triad nucleotide binding protein 3                               |
| Hira      | 0.7424  | 8.473 | 10.25  | 4.87E-10 | 2.53E-08 | 13.04 | <a href="#">15260</a>  | histone cell cycle regulation defective homolog A ( <i>S. cerevisiae</i> ) |
| Hirip3    | 1.18    | 7.487 | 11.44  | 5.74E-11 | 4.27E-09 | 15.19 | <a href="#">233876</a> | HIRA interacting protein 3                                                 |
| Hist1h1a  | 1.993   | 10.11 | 14.67  | 3.71E-13 | 6.90E-11 | 20.24 | <a href="#">80838</a>  | histone cluster 1 H1a                                                      |
| Hist1h1b  | 1.819   | 10.15 | 10.99  | 1.27E-10 | 8.34E-09 | 14.39 | <a href="#">56702</a>  | histone cluster 1 H1b                                                      |
| Hist1h2aa | 0.743   | 8.374 | 10.05  | 7.08E-10 | 3.48E-08 | 12.66 | <a href="#">319163</a> | histone cluster 1 H2aa                                                     |
| Hist1h2ab | 2.468   | 9.145 | 12     | 2.24E-11 | 1.93E-09 | 16.14 | <a href="#">319172</a> | histone cluster 1 H2ab                                                     |
| Hist1h2ae | 1.374   | 5.336 | 9.953  | 8.45E-10 | 4.08E-08 | 12.48 | <a href="#">319166</a> | histone cluster 1 H2ae                                                     |
| Hist1h2ak | 1.148   | 8.855 | 10.42  | 3.57E-10 | 1.95E-08 | 13.35 | <a href="#">319169</a> | histone cluster 1 H2ak                                                     |
| Hist1h2ao | 1.541   | 11.15 | 15.91  | 6.75E-14 | 1.80E-11 | 21.93 | <a href="#">665433</a> | histone cluster 1 H2ao                                                     |
| Hist1h2ba | 1.346   | 7.992 | 8.871  | 7.04E-09 | 2.40E-07 | 10.33 | <a href="#">319177</a> | histone cluster 1 H2ba                                                     |
| Hist1h2bb | 1.675   | 10.19 | 10.12  | 6.13E-10 | 3.09E-08 | 12.8  | <a href="#">319178</a> | histone cluster 1 H2bb                                                     |
| Hist1h2bf | 1.089   | 12.18 | 9.648  | 1.51E-09 | 6.59E-08 | 11.89 | <a href="#">319180</a> | histone cluster 1 H2bf                                                     |
| Hist1h2bg | 1.685   | 9.036 | 11.44  | 5.77E-11 | 4.28E-09 | 15.19 | <a href="#">319181</a> | histone cluster 1 H2bg                                                     |
| Hist1h2bh | 1.375   | 7.681 | 8.021  | 4.13E-08 | 1.09E-06 | 8.542 | <a href="#">319182</a> | histone cluster 1 H2bh                                                     |

|              |         |       |        |          |          |       |                           |                                                                                                 |
|--------------|---------|-------|--------|----------|----------|-------|---------------------------|-------------------------------------------------------------------------------------------------|
| Hist1h2bm    | 1.64    | 10.73 | 11.73  | 3.50E-11 | 2.83E-09 | 15.69 | <a href="#">319186</a>    | histone cluster 1 H2bm                                                                          |
| Hist1h2bn    | 1.532   | 10.67 | 10.65  | 2.33E-10 | 1.37E-08 | 13.78 | <a href="#">319187</a>    | histone cluster 1 H2bn                                                                          |
| Hist1h2bp    | 0.7611  | 6.156 | 8.197  | 2.84E-08 | 7.79E-07 | 8.921 | <a href="#">319188</a>    | histone cluster 1 H2bp                                                                          |
| Hist1h2bq    | 1.084   | 12.18 | 9.836  | 1.06E-09 | 4.87E-08 | 12.25 | <a href="#">665596</a>    | histone cluster 1 H2bq                                                                          |
| Hist1h3a     | 1.323   | 12.57 | 10.39  | 3.73E-10 | 2.02E-08 | 13.31 | <a href="#">360198</a>    | histone cluster 1 H3a                                                                           |
| Hist1h3e     | 1.299   | 12.54 | 10.33  | 4.16E-10 | 2.22E-08 | 13.2  | <a href="#">319151</a>    | histone cluster 1 H3e                                                                           |
| Hist1h3f     | 1.294   | 12.61 | 10.39  | 3.74E-10 | 2.03E-08 | 13.3  | <a href="#">260423</a>    | histone cluster 1 H3f                                                                           |
| Hist1h4a     | 0.8151  | 9.407 | 11.73  | 3.51E-11 | 2.83E-09 | 15.69 | <a href="#">326619</a>    | histone cluster 1 H4a                                                                           |
| Hist1h4c     | 1.2     | 9.142 | 11.79  | 3.21E-11 | 2.66E-09 | 15.78 | <a href="#">319155</a>    | histone cluster 1 H4c                                                                           |
| Hist1h4d     | 0.9111  | 12.26 | 10.35  | 4.06E-10 | 2.18E-08 | 13.22 | <a href="#">319156</a>    | histone cluster 1 H4d                                                                           |
| Hist1h4f     | 1.159   | 10.9  | 9.296  | 3.01E-09 | 1.18E-07 | 11.19 | <a href="#">319157</a>    | histone cluster 1 H4f                                                                           |
| Hist1h4h     | 0.8629  | 12.64 | 10.74  | 2.00E-10 | 1.22E-08 | 13.94 | <a href="#">69386</a>     | histone cluster 1 H4h                                                                           |
| Hist1h4j     | 1.526   | 8.13  | 11.71  | 3.65E-11 | 2.92E-09 | 15.65 | <a href="#">319159</a>    | histone cluster 1 H4j                                                                           |
| Hist1h4m     | 0.8168  | 10.28 | 11.67  | 3.91E-11 | 3.09E-09 | 15.58 | <a href="#">100041230</a> | histone cluster 1 H4m                                                                           |
| Hist2h2aa1   | 0.821   | 11.62 | 10.74  | 1.97E-10 | 1.21E-08 | 13.95 | <a href="#">15267</a>     | histone cluster 2 H2aa1                                                                         |
| Hist2h2ab    | 0.8821  | 12.33 | 10.02  | 7.39E-10 | 3.61E-08 | 12.61 | <a href="#">621893</a>    | histone cluster 2 H2ab                                                                          |
| Hist2h2bb    | 1.065   | 9.166 | 11.98  | 2.34E-11 | 2.00E-09 | 16.1  | <a href="#">319189</a>    | histone cluster 2 H2bb                                                                          |
| Hist2h3b     | 1.784   | 5.779 | 10.51  | 3.02E-10 | 1.69E-08 | 13.52 | <a href="#">319154</a>    | histone cluster 2 H3b                                                                           |
| Hist2h3c2    | 1.343   | 12.56 | 10.25  | 4.83E-10 | 2.52E-08 | 13.04 | <a href="#">97114</a>     | histone cluster 2 H3c2                                                                          |
| Hist2h4      | 1.056   | 11.17 | 10.33  | 4.18E-10 | 2.22E-08 | 13.19 | <a href="#">97122</a>     | histone cluster 2 H4                                                                            |
| Hist3h2bb-ps | 1.033   | 8.004 | 10.5   | 3.06E-10 | 1.71E-08 | 13.5  | <a href="#">382522</a>    | histone cluster 3 H2bb pseudogene                                                               |
| Hist4h4      | 0.9667  | 9.893 | 8.763  | 8.76E-09 | 2.85E-07 | 10.11 | <a href="#">320332</a>    | histone cluster 4 H4                                                                            |
| Hjurp        | 1.143   | 8.364 | 10.67  | 2.24E-10 | 1.33E-08 | 13.82 | <a href="#">381280</a>    | Holliday junction recognition protein                                                           |
| Hlcs         | -0.9469 | 7.554 | -10.25 | 4.86E-10 | 2.53E-08 | 13.04 | <a href="#">110948</a>    | holocarboxylase synthetase (biotin-[propionyl-Coenzyme A-carboxylase (ATP-hydrolysing)] ligase) |

|           |         |       |        |          |          |       |                        |                                                               |
|-----------|---------|-------|--------|----------|----------|-------|------------------------|---------------------------------------------------------------|
| Hmga1     | 0.8687  | 9.473 | 10.05  | 7.09E-10 | 3.48E-08 | 12.66 | <a href="#">15361</a>  | high mobility group AT-hook 1                                 |
| Hmgb1     | 0.7567  | 11.39 | 12.32  | 1.33E-11 | 1.26E-09 | 16.66 | <a href="#">15289</a>  | high mobility group box 1                                     |
| Hmgb2     | 1.696   | 10.03 | 16.66  | 2.55E-14 | 8.90E-12 | 22.89 | <a href="#">97165</a>  | high mobility group box 2                                     |
| Hmgb3     | 1.663   | 8.062 | 15.49  | 1.19E-13 | 2.75E-11 | 21.37 | <a href="#">15354</a>  | high mobility group box 3                                     |
| Hmgcl1    | 3.524   | 6.605 | 21.81  | 7.44E-17 | 1.56E-13 | 28.55 | <a href="#">208982</a> | 3-hydroxymethyl-3-methylglutaryl-Coenzyme A lyase-like 1      |
| Hmgn2     | 0.8608  | 10.48 | 11.42  | 6.03E-11 | 4.42E-09 | 15.14 | <a href="#">15331</a>  | high mobility group nucleosomal binding domain 2              |
| Hmgn2-ps1 | 0.6882  | 9.029 | 9.078  | 4.64E-09 | 1.71E-07 | 10.76 | ---                    | high mobility group nucleosomal binding domain 2 pseudogene 1 |
| Hmgn3     | 1.239   | 7.108 | 9.113  | 4.32E-09 | 1.61E-07 | 10.83 | <a href="#">94353</a>  | high mobility group nucleosomal binding domain 3              |
| Hmmr      | 2.218   | 7.013 | 16.12  | 5.11E-14 | 1.45E-11 | 22.21 | <a href="#">15366</a>  | hyaluronan mediated motility receptor (RHAMM)                 |
| Hnrnpab   | 0.5473  | 10.47 | 9.07   | 4.71E-09 | 1.73E-07 | 10.74 | <a href="#">15384</a>  | heterogeneous nuclear ribonucleoprotein A/B                   |
| Homer3    | 0.5709  | 7.421 | 8.679  | 1.04E-08 | 3.30E-07 | 9.938 | <a href="#">26558</a>  | homer homolog 3 (Drosophila)                                  |
| Hpcal1    | -0.7852 | 8.438 | -9.335 | 2.78E-09 | 1.10E-07 | 11.27 | <a href="#">53602</a>  | hippocalcin-like 1                                            |
| Hpgds     | -1.549  | 6.988 | -9.172 | 3.85E-09 | 1.46E-07 | 10.95 | <a href="#">54486</a>  | hematopoietic prostaglandin D synthase                        |
| Icos      | -2.019  | 7.987 | -8.542 | 1.38E-08 | 4.18E-07 | 9.653 | <a href="#">54167</a>  | inducible T cell co-stimulator                                |
| Ids       | -1.01   | 8.753 | -11.43 | 5.87E-11 | 4.34E-09 | 15.17 | <a href="#">15931</a>  | iduronate 2-sulfatase                                         |
| Iffo2     | -0.7025 | 6.444 | -10.3  | 4.39E-10 | 2.32E-08 | 13.14 | <a href="#">212632</a> | intermediate filament family orphan 2                         |
| Ifnar2    | -0.9451 | 9.923 | -10.41 | 3.60E-10 | 1.96E-08 | 13.34 | <a href="#">15976</a>  | interferon (alpha and beta) receptor 2                        |
| Ift122    | 0.9007  | 6.54  | 10.59  | 2.61E-10 | 1.50E-08 | 13.67 | <a href="#">81896</a>  | intraflagellar transport 122                                  |

|        |         |       |        |          |          |       |                        |                                              |
|--------|---------|-------|--------|----------|----------|-------|------------------------|----------------------------------------------|
| lft22  | 0.9273  | 8.982 | 14.21  | 7.18E-13 | 1.14E-10 | 19.58 | <a href="#">67286</a>  | intraflagellar transport 22                  |
| lgf1r  | -1.385  | 7.367 | -12.49 | 9.99E-12 | 1.00E-09 | 16.95 | <a href="#">16001</a>  | insulin-like growth factor I receptor        |
| lgll1  | 5.301   | 8.871 | 21.71  | 8.23E-17 | 1.63E-13 | 28.46 | <a href="#">16136</a>  | immunoglobulin lambda-like polypeptide 1     |
| lkzf2  | -0.8565 | 7.388 | -8.161 | 3.07E-08 | 8.34E-07 | 8.844 | <a href="#">22779</a>  | IKAROS family zinc finger 2                  |
| ll10rb | -1.498  | 9.175 | -13.89 | 1.16E-12 | 1.68E-10 | 19.11 | <a href="#">16155</a>  | interleukin 10 receptor beta                 |
| ll18r1 | -2.555  | 7.309 | -15.32 | 1.49E-13 | 3.34E-11 | 21.15 | <a href="#">16182</a>  | interleukin 18 receptor 1                    |
| ll1rl2 | -1.682  | 6.648 | -11.34 | 6.90E-11 | 4.95E-09 | 15.01 | <a href="#">107527</a> | interleukin 1 receptor-like 2                |
| ll21r  | -2.039  | 9.574 | -9.431 | 2.31E-09 | 9.39E-08 | 11.46 | <a href="#">60504</a>  | interleukin 21 receptor                      |
| ll23r  | -0.7764 | 5.186 | -8.053 | 3.86E-08 | 1.02E-06 | 8.612 | <a href="#">209590</a> | interleukin 23 receptor                      |
| ll27ra | -2.101  | 9.324 | -9.387 | 2.51E-09 | 1.01E-07 | 11.38 | <a href="#">50931</a>  | interleukin 27 receptor alpha                |
| ll2rb  | -2.087  | 8.659 | -9.93  | 8.83E-10 | 4.23E-08 | 12.43 | <a href="#">16185</a>  | interleukin 2 receptor beta chain            |
| ll6st  | -2.072  | 9.467 | -15.84 | 7.46E-14 | 1.94E-11 | 21.83 | <a href="#">16195</a>  | interleukin 6 signal transducer              |
| llf2   | 0.9819  | 8.817 | 10.83  | 1.68E-10 | 1.06E-08 | 14.11 | <a href="#">67781</a>  | interleukin enhancer binding factor 2        |
| llf3   | 0.6158  | 9.242 | 8.181  | 2.94E-08 | 8.03E-07 | 8.887 | <a href="#">16201</a>  | interleukin enhancer binding factor 3        |
| lmpdh2 | 0.6871  | 9.015 | 9.391  | 2.49E-09 | 1.00E-07 | 11.38 | <a href="#">23918</a>  | inosine 5-phosphate dehydrogenase 2          |
| lncnp  | 1.422   | 8.179 | 15.44  | 1.28E-13 | 2.92E-11 | 21.3  | <a href="#">16319</a>  | inner centromere protein                     |
| lnip   | 0.4535  | 8.574 | 8.484  | 1.56E-08 | 4.67E-07 | 9.529 | <a href="#">66209</a>  | INTS3 and NABP interacting protein           |
| lnpp4a | -1.432  | 8.068 | -9.115 | 4.30E-09 | 1.60E-07 | 10.83 | <a href="#">269180</a> | inositol polyphosphate-4-phosphatase type I  |
| lnpp4b | -2.353  | 8.531 | -16.29 | 4.09E-14 | 1.27E-11 | 22.43 | <a href="#">234515</a> | inositol polyphosphate-4-phosphatase type II |

|        |         |       |        |          |          |       |                        |                                                                  |
|--------|---------|-------|--------|----------|----------|-------|------------------------|------------------------------------------------------------------|
| Inpp5d | 0.8993  | 10.81 | 8.941  | 6.10E-09 | 2.13E-07 | 10.48 | <a href="#">16331</a>  | inositol polyphosphate-5-phosphatase D                           |
| Inpp5f | -1.521  | 7.423 | -9.885 | 9.61E-10 | 4.53E-08 | 12.35 | <a href="#">101490</a> | inositol polyphosphate-5-phosphatase F                           |
| lpmk   | 1.833   | 9.703 | 14.94  | 2.53E-13 | 5.08E-11 | 20.62 | <a href="#">69718</a>  | inositol polyphosphate multikinase                               |
| lpo11  | 0.6881  | 8.249 | 9.277  | 3.12E-09 | 1.22E-07 | 11.16 | <a href="#">76582</a>  | importin 11                                                      |
| lpo5   | 0.8965  | 9.292 | 8.996  | 5.47E-09 | 1.96E-07 | 10.59 | <a href="#">70572</a>  | importin 5                                                       |
| lpo7   | 0.659   | 9.239 | 8.351  | 2.05E-08 | 5.94E-07 | 9.25  | <a href="#">233726</a> | importin 7                                                       |
| lpo9   | 0.5913  | 9.341 | 8.032  | 4.04E-08 | 1.07E-06 | 8.564 | <a href="#">226432</a> | importin 9                                                       |
| lqgap2 | -1.861  | 8.031 | -14.58 | 4.23E-13 | 7.60E-11 | 20.11 | <a href="#">544963</a> | IQ motif containing GTPase activating protein 2                  |
| lqgap3 | 1.412   | 7.137 | 12.53  | 9.50E-12 | 9.60E-10 | 17    | <a href="#">404710</a> | IQ motif containing GTPase activating protein 3                  |
| lrak2  | -1.408  | 8.23  | -9.716 | 1.33E-09 | 5.88E-08 | 12.02 | <a href="#">108960</a> | interleukin-1 receptor-associated kinase 2                       |
| lreb2  | 0.4277  | 8.738 | 8.001  | 4.31E-08 | 1.13E-06 | 8.499 | <a href="#">64602</a>  | iron responsive element binding protein 2                        |
| ltfg3  | -1.158  | 8.075 | -10.57 | 2.70E-10 | 1.54E-08 | 13.63 | <a href="#">106581</a> | integrin alpha FG-GAP repeat containing 3                        |
| ltga6  | -1.244  | 8.654 | -12.88 | 5.37E-12 | 5.93E-10 | 17.57 | <a href="#">16403</a>  | integrin alpha 6                                                 |
| ltgae  | -1.457  | 6.942 | -8.628 | 1.16E-08 | 3.61E-07 | 9.832 | <a href="#">16407</a>  | integrin alpha E epithelial-associated                           |
| ltgb7  | -2.284  | 8.823 | -13.5  | 2.06E-12 | 2.69E-10 | 18.53 | <a href="#">16421</a>  | integrin beta 7                                                  |
| ltk    | -3.454  | 9.083 | -15.84 | 7.43E-14 | 1.94E-11 | 21.84 | <a href="#">16428</a>  | IL2 inducible T cell kinase                                      |
| ltm2c  | -0.9353 | 9.576 | -8.869 | 7.06E-09 | 2.40E-07 | 10.33 | <a href="#">64294</a>  | integral membrane protein 2C                                     |
| ltpa   | 0.5412  | 9.44  | 8.701  | 9.94E-09 | 3.19E-07 | 9.984 | <a href="#">16434</a>  | inosine triphosphatase (nucleoside triphosphate pyrophosphatase) |



|         |        |       |        |          |          |       |                        |                                                       |
|---------|--------|-------|--------|----------|----------|-------|------------------------|-------------------------------------------------------|
| Jade3   | 0.662  | 7.954 | 8.211  | 2.76E-08 | 7.62E-07 | 8.95  | <a href="#">382207</a> | jade family PHD finger 3                              |
| Jam2    | -1.899 | 7.762 | -7.984 | 4.48E-08 | 1.16E-06 | 8.46  | <a href="#">67374</a>  | junction adhesion molecule 2                          |
| Kansl1l | 1.77   | 7.578 | 14.23  | 6.95E-13 | 1.11E-10 | 19.62 | <a href="#">68691</a>  | KAT8 regulatory NSL complex subunit 1-like            |
| Kbtbd11 | -1.189 | 8.174 | -8.98  | 5.64E-09 | 2.00E-07 | 10.56 | <a href="#">74901</a>  | kelch repeat and BTB (POZ) domain containing 11       |
| Kcnq5   | 0.9039 | 8.019 | 12.82  | 5.95E-12 | 6.45E-10 | 17.47 | <a href="#">226922</a> | potassium voltage-gated channel subfamily Q member 5  |
| Kctd3   | 0.942  | 8.598 | 15.73  | 8.60E-14 | 2.14E-11 | 21.69 | <a href="#">226823</a> | potassium channel tetramerisation domain containing 3 |
| Kdm1a   | 0.4507 | 8.797 | 9.033  | 5.07E-09 | 1.84E-07 | 10.67 | <a href="#">99982</a>  | lysine (K)-specific demethylase 1A                    |
| Kif11   | 2.534  | 8.523 | 17.38  | 1.03E-14 | 4.53E-12 | 23.78 | <a href="#">16551</a>  | kinesin family member 11                              |
| Kif14   | 1.92   | 6.725 | 14.15  | 7.91E-13 | 1.21E-10 | 19.49 | <a href="#">381293</a> | kinesin family member 14                              |
| Kif15   | 2.232  | 7.774 | 17.95  | 5.15E-15 | 2.83E-12 | 24.46 | <a href="#">209737</a> | kinesin family member 15                              |
| Kif18a  | 1.401  | 7.185 | 12.87  | 5.48E-12 | 6.03E-10 | 17.55 | <a href="#">228421</a> | kinesin family member 18A                             |
| Kif18b  | 2.089  | 8.017 | 16.2   | 4.58E-14 | 1.37E-11 | 22.31 | <a href="#">70218</a>  | kinesin family member 18B                             |
| Kif1b   | -1.48  | 7.989 | -13.29 | 2.85E-12 | 3.50E-10 | 18.21 | <a href="#">16561</a>  | kinesin family member 1B                              |
| Kif20a  | 2.087  | 7.932 | 15.29  | 1.57E-13 | 3.45E-11 | 21.1  | <a href="#">19348</a>  | kinesin family member 20A                             |
| Kif20b  | 1.521  | 7.267 | 14.47  | 4.92E-13 | 8.45E-11 | 19.96 | <a href="#">240641</a> | kinesin family member 20B                             |
| Kif22   | 1.929  | 7.689 | 15.26  | 1.62E-13 | 3.50E-11 | 21.06 | <a href="#">110033</a> | kinesin family member 22                              |
| Kif23   | 1.753  | 8.18  | 18.6   | 2.40E-15 | 1.68E-12 | 25.2  | <a href="#">71819</a>  | kinesin family member 23                              |
| Kif24   | 1.525  | 6.792 | 14.92  | 2.61E-13 | 5.19E-11 | 20.59 | <a href="#">109242</a> | kinesin family member 24                              |
| Kif2a   | 1.287  | 9.023 | 15.77  | 8.10E-14 | 2.07E-11 | 21.75 | <a href="#">16563</a>  | kinesin family member 2A                              |
| Kif2c   | 2.31   | 7.52  | 18.38  | 3.10E-15 | 1.97E-12 | 24.96 | <a href="#">73804</a>  | kinesin family member 2C                              |
| Kif4    | 2.309  | 7.061 | 15.59  | 1.04E-13 | 2.47E-11 | 21.51 | <a href="#">16571</a>  | kinesin family member 4                               |
| Klf12   | -1.249 | 6.886 | -9.745 | 1.26E-09 | 5.64E-08 | 12.08 | <a href="#">16597</a>  | Kruppel-like factor 12                                |
| Klf3    | -1.481 | 9.047 | -10.08 | 6.70E-10 | 3.34E-08 | 12.71 | <a href="#">16599</a>  | Kruppel-like factor 3 (basic)                         |

|        |         |       |        |          |          |       |                           |                                                          |
|--------|---------|-------|--------|----------|----------|-------|---------------------------|----------------------------------------------------------|
| Klhl3  | -0.9849 | 7.012 | -8.054 | 3.85E-08 | 1.02E-06 | 8.613 | <a href="#">100503085</a> | kelch-like 3                                             |
| Klhl6  | 0.9643  | 9.958 | 8.065  | 3.76E-08 | 1.00E-06 | 8.638 | <a href="#">239743</a>    | kelch-like 6                                             |
| Klkb1  | -0.6812 | 6.6   | -9.173 | 3.84E-09 | 1.45E-07 | 10.95 | <a href="#">16621</a>     | kallikrein B plasma 1                                    |
| Klra10 | -1.13   | 4.599 | -9.717 | 1.32E-09 | 5.88E-08 | 12.02 | <a href="#">16628</a>     | killer cell lectin-like receptor subfamily A member 10   |
| Klra3  | -1.239  | 6.193 | -12.13 | 1.82E-11 | 1.64E-09 | 16.35 | <a href="#">16634</a>     | killer cell lectin-like receptor subfamily A member 3    |
| Klrc1  | -1.784  | 6.036 | -13.77 | 1.39E-12 | 1.96E-10 | 18.93 | <a href="#">16641</a>     | killer cell lectin-like receptor subfamily C member 1    |
| Klri2  | -1.646  | 5.317 | -9.674 | 1.44E-09 | 6.31E-08 | 11.94 | <a href="#">320407</a>    | killer cell lectin-like receptor family I member 2       |
| Klrk1  | -1.686  | 5.877 | -10.36 | 3.92E-10 | 2.11E-08 | 13.25 | <a href="#">27007</a>     | killer cell lectin-like receptor subfamily K member 1    |
| Knstrn | 1.425   | 8.039 | 13.27  | 2.93E-12 | 3.59E-10 | 18.18 | <a href="#">51944</a>     | kinetochore-localized astrin/SPAG5 binding               |
| Kntc1  | 1.794   | 6.606 | 13.35  | 2.59E-12 | 3.25E-10 | 18.3  | <a href="#">208628</a>    | kinetochore associated 1                                 |
| Kpna2  | 1.523   | 9.625 | 16.19  | 4.70E-14 | 1.37E-11 | 22.29 | <a href="#">16647</a>     | karyopherin (importin) alpha 2                           |
| Kpna3  | 0.825   | 9.784 | 8.447  | 1.68E-08 | 4.98E-07 | 9.453 | <a href="#">16648</a>     | karyopherin (importin) alpha 3                           |
| Ksr1   | -0.6285 | 7.687 | -9.513 | 1.97E-09 | 8.18E-08 | 11.62 | <a href="#">16706</a>     | kinase suppressor of ras 1                               |
| Kti12  | 0.6173  | 9.994 | 9.694  | 1.38E-09 | 6.10E-08 | 11.98 | <a href="#">100087</a>    | KT112 homolog chromatin associated (S. cerevisiae)       |
| Kynu   | -2.397  | 7.72  | -14.18 | 7.52E-13 | 1.18E-10 | 19.54 | <a href="#">70789</a>     | kynureninase (L-kynurenine hydrolase)                    |
| Lacc1  | -1.504  | 7.299 | -9.148 | 4.03E-09 | 1.51E-07 | 10.9  | <a href="#">210808</a>    | laccase (multicopper oxidoreductase) domain containing 1 |
| Lair1  | -1.359  | 7.722 | -10.14 | 5.92E-10 | 3.00E-08 | 12.84 | <a href="#">52855</a>     | leukocyte-associated Ig-like receptor 1                  |

|              |         |       |        |          |          |       |                           |                                                                 |
|--------------|---------|-------|--------|----------|----------|-------|---------------------------|-----------------------------------------------------------------|
| Lamp3        | -0.7562 | 4.776 | -8.451 | 1.67E-08 | 4.94E-07 | 9.461 | <a href="#">239739</a>    | lysosomal-associated membrane protein 3                         |
| Lancl2       | 1.306   | 8.158 | 11.42  | 5.98E-11 | 4.40E-09 | 15.15 | <a href="#">71835</a>     | LanC (bacterial lantibiotic synthetase component C)-like 2      |
| Larp7        | 0.6529  | 8.826 | 8.848  | 7.36E-09 | 2.48E-07 | 10.29 | <a href="#">28036</a>     | La ribonucleoprotein domain family member 7                     |
| Lat          | -2.406  | 8.828 | -12.83 | 5.87E-12 | 6.42E-10 | 17.48 | <a href="#">16797</a>     | linker for activation of T cells                                |
| Lbr          | 0.7975  | 10.26 | 8.963  | 5.85E-09 | 2.06E-07 | 10.52 | <a href="#">98386</a>     | lamin B receptor                                                |
| Lck          | -2.258  | 9.869 | -8.801 | 8.10E-09 | 2.66E-07 | 10.19 | <a href="#">16818</a>     | lymphocyte protein tyrosine kinase                              |
| Lcp2         | -1.319  | 10.02 | -10.74 | 1.98E-10 | 1.21E-08 | 13.94 | <a href="#">16822</a>     | lymphocyte cytosolic protein 2                                  |
| Lgals9       | 1.688   | 10.46 | 12.71  | 7.07E-12 | 7.46E-10 | 17.3  | <a href="#">16859</a>     | lectin galactose binding soluble 9                              |
| Lgr5         | 3.17    | 6.967 | 14.13  | 8.14E-13 | 1.23E-10 | 19.46 | <a href="#">14160</a>     | leucine rich repeat containing G protein coupled receptor 5     |
| Lhx2         | 1.88    | 7.291 | 11.79  | 3.21E-11 | 2.66E-09 | 15.78 | <a href="#">16870</a>     | LIM homeobox protein 2                                          |
| Lig1         | 1.441   | 8.418 | 12.56  | 9.03E-12 | 9.20E-10 | 17.05 | <a href="#">16881</a>     | ligase I DNA ATP-dependent                                      |
| Lin9         | 1.123   | 6.895 | 8.02   | 4.14E-08 | 1.09E-06 | 8.539 | <a href="#">72568</a>     | lin-9 homolog (C. elegans)                                      |
| Lincpint     | -1.92   | 8.948 | -7.96  | 4.71E-08 | 1.21E-06 | 8.409 | <a href="#">232685</a>    | long intergenic non-protein coding RNA Trp53 induced transcript |
| Lipa         | -0.7348 | 9.846 | -8.444 | 1.69E-08 | 5.01E-07 | 9.445 | <a href="#">16889</a>     | lysosomal acid lipase A                                         |
| Lmnb1        | 1.714   | 9.095 | 13.5   | 2.07E-12 | 2.69E-10 | 18.53 | <a href="#">16906</a>     | lamin B1                                                        |
| Lmnb2        | 0.7786  | 7.481 | 8.601  | 1.22E-08 | 3.77E-07 | 9.776 | <a href="#">16907</a>     | lamin B2                                                        |
| LOC102635075 | 0.6673  | 11.46 | 8.957  | 5.92E-09 | 2.08E-07 | 10.51 | <a href="#">102635075</a> | high mobility group protein B1-like                             |
| LOC102640615 | 0.7453  | 11.06 | 9.325  | 2.84E-09 | 1.12E-07 | 11.25 | <a href="#">102640615</a> | non-histone chromosomal protein HMG-17-like                     |
| LOC102640809 | 1.004   | 5.51  | 7.969  | 4.62E-08 | 1.19E-06 | 8.428 | <a href="#">102640809</a> | uncharacterized LOC102640809                                    |

|        |         |       |        |          |          |       |                        |                                                                          |
|--------|---------|-------|--------|----------|----------|-------|------------------------|--------------------------------------------------------------------------|
| Lonp2  | -0.6394 | 9.074 | -8.324 | 2.17E-08 | 6.20E-07 | 9.192 | <a href="#">66887</a>  | lon peptidase 2 peroxisomal                                              |
| Lpcat2 | -1.724  | 7.796 | -8.497 | 1.51E-08 | 4.55E-07 | 9.558 | <a href="#">270084</a> | lysophosphatidylcholine<br>acyltransferase 2                             |
| Lphn2  | 2.9     | 5.607 | 11.62  | 4.24E-11 | 3.30E-09 | 15.5  | <a href="#">99633</a>  | latrophilin 2                                                            |
| Lrig1  | -1.568  | 7.123 | -14.14 | 8.00E-13 | 1.22E-10 | 19.48 | <a href="#">16206</a>  | leucine-rich repeats and<br>immunoglobulin-like domains 1                |
| Lrmp   | 1.22    | 9.427 | 11.64  | 4.11E-11 | 3.21E-09 | 15.53 | <a href="#">16970</a>  | lymphoid-restricted membrane<br>protein                                  |
| Lrr1   | 1.802   | 6.085 | 9.823  | 1.08E-09 | 4.97E-08 | 12.23 | <a href="#">69706</a>  | leucine rich repeat protein 1                                            |
| Lrrc49 | 0.9846  | 7.109 | 8.519  | 1.45E-08 | 4.36E-07 | 9.604 | <a href="#">102747</a> | leucine rich repeat containing 49                                        |
| Lrrc59 | 0.7289  | 10.13 | 8.257  | 2.50E-08 | 6.98E-07 | 9.05  | <a href="#">98238</a>  | leucine rich repeat containing 59                                        |
| Lrrc61 | -1.218  | 8.844 | -11.13 | 9.92E-11 | 6.72E-09 | 14.64 | <a href="#">243371</a> | leucine rich repeat containing 61                                        |
| Lrrn4  | 1.546   | 6.401 | 9.539  | 1.87E-09 | 7.86E-08 | 11.68 | <a href="#">320974</a> | leucine rich repeat neuronal 4                                           |
| Lsm2   | 0.6827  | 7.102 | 9.506  | 1.99E-09 | 8.29E-08 | 11.61 | <a href="#">27756</a>  | LSM2 homolog U6 small nuclear RNA<br>associated ( <i>S. cerevisiae</i> ) |
| Lxn    | 2.437   | 7.589 | 12.15  | 1.75E-11 | 1.59E-09 | 16.39 | <a href="#">17035</a>  | latexin                                                                  |
| Ly6d   | -1.637  | 9.184 | -10.07 | 6.84E-10 | 3.39E-08 | 12.69 | <a href="#">17068</a>  | lymphocyte antigen 6 complex locus D                                     |
| Lypd6b | -0.91   | 6.533 | -8.008 | 4.25E-08 | 1.11E-06 | 8.512 | <a href="#">71897</a>  | LY6/PLAUR domain containing 6B                                           |
| Lysmd2 | -0.7668 | 6.648 | -8.299 | 2.29E-08 | 6.49E-07 | 9.139 | <a href="#">70082</a>  | LysM putative peptidoglycan-binding<br>domain containing 2               |
| Mad2l1 | 1.372   | 9.202 | 13.95  | 1.05E-12 | 1.54E-10 | 19.2  | <a href="#">56150</a>  | MAD2 mitotic arrest deficient-like 1                                     |

|          |         |       |        |          |          |       |                        |                                                                 |
|----------|---------|-------|--------|----------|----------|-------|------------------------|-----------------------------------------------------------------|
| Malt1    | -1.167  | 9.381 | -8.617 | 1.18E-08 | 3.67E-07 | 9.809 | <a href="#">240354</a> | mucosa associated lymphoid tissue lymphoma translocation gene 1 |
| Maml3    | 1.141   | 8.196 | 11.43  | 5.93E-11 | 4.37E-09 | 15.16 | <a href="#">433586</a> | mastermind like 3 (Drosophila)                                  |
| Man1c1   | -1.428  | 7.887 | -8.845 | 7.42E-09 | 2.49E-07 | 10.28 | <a href="#">230815</a> | mannosidase alpha class 1C member 1                             |
| Mapk12   | -0.8129 | 7.482 | -9.423 | 2.34E-09 | 9.49E-08 | 11.45 | <a href="#">29857</a>  | mitogen-activated protein kinase 12                             |
| Mapre3   | -0.6549 | 7.291 | -10.11 | 6.28E-10 | 3.16E-08 | 12.78 | <a href="#">100732</a> | microtubule-associated protein RP/EB family member 3            |
| Marveld1 | -1.239  | 8.486 | -16.84 | 2.01E-14 | 7.45E-12 | 23.12 | <a href="#">277010</a> | MARVEL (membrane-associating) domain containing 1               |
| Mastl    | 1.959   | 6.398 | 13.96  | 1.04E-12 | 1.53E-10 | 19.22 | <a href="#">67121</a>  | microtubule associated serine/threonine kinase-like             |
| Mboat1   | -1.722  | 7.21  | -8.471 | 1.60E-08 | 4.77E-07 | 9.504 | <a href="#">218121</a> | membrane bound O-acyltransferase domain containing 1            |
| Mcm10    | 1.822   | 7.67  | 15.85  | 7.33E-14 | 1.93E-11 | 21.85 | <a href="#">70024</a>  | minichromosome maintenance deficient 10 (S. cerevisiae)         |
| Mcm2     | 1.338   | 9.5   | 13     | 4.47E-12 | 5.10E-10 | 17.76 | <a href="#">17216</a>  | minichromosome maintenance deficient 2 mitotin (S. cerevisiae)  |
| Mcm3     | 1.442   | 8.881 | 14.44  | 5.13E-13 | 8.70E-11 | 19.92 | <a href="#">17215</a>  | minichromosome maintenance deficient 3 (S. cerevisiae)          |
| Mcm4     | 1.034   | 9.225 | 11.8   | 3.16E-11 | 2.62E-09 | 15.79 | <a href="#">17217</a>  | minichromosome maintenance deficient 4 homolog (S. cerevisiae)  |

|        |         |       |        |          |          |       |                        |                                                                                                 |
|--------|---------|-------|--------|----------|----------|-------|------------------------|-------------------------------------------------------------------------------------------------|
| Mcm5   | 1.079   | 9.356 | 10.73  | 2.02E-10 | 1.23E-08 | 13.92 | <a href="#">17218</a>  | minichromosome maintenance deficient 5 cell division cycle 46 ( <i>S. cerevisiae</i> )          |
| Mcm6   | 1.798   | 8.998 | 16.45  | 3.34E-14 | 1.09E-11 | 22.63 | <a href="#">17219</a>  | minichromosome maintenance deficient 6 (MIS5 homolog <i>S. pombe</i> ) ( <i>S. cerevisiae</i> ) |
| Mcm7   | 1.379   | 9.739 | 12.95  | 4.86E-12 | 5.45E-10 | 17.67 | <a href="#">17220</a>  | minichromosome maintenance deficient 7 ( <i>S. cerevisiae</i> )                                 |
| Mcm8   | 0.8507  | 6.684 | 10.91  | 1.46E-10 | 9.47E-09 | 14.25 | <a href="#">66634</a>  | minichromosome maintenance deficient 8 ( <i>S. cerevisiae</i> )                                 |
| Mctp2  | -2.583  | 7.02  | -18.46 | 2.83E-15 | 1.90E-12 | 25.05 | <a href="#">244049</a> | multiple C2 domains transmembrane 2                                                             |
| Mdm1   | 0.6285  | 7.286 | 8.57   | 1.30E-08 | 3.99E-07 | 9.711 | <a href="#">17245</a>  | transformed mouse 3T3 cell double minute 1                                                      |
| Med10  | 0.7756  | 9.547 | 12.92  | 5.05E-12 | 5.65E-10 | 17.63 | <a href="#">28077</a>  | mediator complex subunit 10                                                                     |
| Melk   | 1.47    | 6.924 | 11.62  | 4.24E-11 | 3.30E-09 | 15.5  | <a href="#">17279</a>  | maternal embryonic leucine zipper kinase                                                        |
| Memo1  | 0.8741  | 7.924 | 10.37  | 3.87E-10 | 2.09E-08 | 13.27 | <a href="#">76890</a>  | mediator of cell motility 1                                                                     |
| Mesdc1 | 0.5391  | 7.272 | 8.829  | 7.65E-09 | 2.55E-07 | 10.25 | <a href="#">80889</a>  | mesoderm development candidate 1                                                                |
| Mex3a  | 0.9498  | 6.702 | 8.348  | 2.07E-08 | 5.98E-07 | 9.242 | <a href="#">72640</a>  | mex3 homolog A ( <i>C. elegans</i> )                                                            |
| Mfhas1 | -1.759  | 8.259 | -18.54 | 2.57E-15 | 1.76E-12 | 25.14 | <a href="#">52065</a>  | malignant fibrous histiocytoma amplified sequence 1                                             |
| Mical2 | -0.7215 | 6.612 | -8.858 | 7.21E-09 | 2.44E-07 | 10.31 | <a href="#">320878</a> | microtubule associated monooxygenase calponin and LIM domain containing 2                       |
| Mif    | 0.8906  | 10.02 | 8.849  | 7.36E-09 | 2.48E-07 | 10.29 | <a href="#">17319</a>  | macrophage migration inhibitory factor                                                          |
| Mif4gd | -1.574  | 8.95  | -13.37 | 2.54E-12 | 3.19E-10 | 18.32 | <a href="#">69674</a>  | MIF4G domain containing                                                                         |

|           |         |       |        |          |          |       |                           |                                                     |
|-----------|---------|-------|--------|----------|----------|-------|---------------------------|-----------------------------------------------------|
| Mipol1    | -0.6032 | 6.441 | -9.084 | 4.58E-09 | 1.69E-07 | 10.77 | <a href="#">73490</a>     | mirror-image polydactyly gene 1 homolog (human)     |
| Mir181b-1 | 1.303   | 5.963 | 8.807  | 8.00E-09 | 2.64E-07 | 10.2  | <a href="#">723890</a>    | microRNA 181b-1                                     |
| Mir568    | -1.38   | 6.752 | -10.78 | 1.85E-10 | 1.15E-08 | 14.01 | <a href="#">100124467</a> | microRNA 568                                        |
| Mis18a    | 0.8016  | 8.301 | 8.539  | 1.39E-08 | 4.21E-07 | 9.645 | <a href="#">66578</a>     | MIS18 kinetochore protein homolog A (S. pombe)      |
| Mis18bp1  | 2.429   | 7.276 | 14.95  | 2.50E-13 | 5.08E-11 | 20.63 | <a href="#">217653</a>    | MIS18 binding protein 1                             |
| Mki67     | 1.973   | 9.703 | 9.885  | 9.62E-10 | 4.53E-08 | 12.35 | <a href="#">17345</a>     | antigen identified by monoclonal antibody Ki 67     |
| Mmp11     | 1.208   | 7.754 | 16.81  | 2.09E-14 | 7.58E-12 | 23.09 | <a href="#">17385</a>     | matrix metalloproteinase 11                         |
| Mms22l    | 1.616   | 7.392 | 15.68  | 9.21E-14 | 2.26E-11 | 21.62 | <a href="#">212377</a>    | MMS22-like DNA repair protein                       |
| Mnd1      | 1.589   | 5.878 | 15.98  | 6.14E-14 | 1.71E-11 | 22.02 | <a href="#">76915</a>     | meiotic nuclear divisions 1 homolog (S. cerevisiae) |
| Mns1      | 1.407   | 7.175 | 14.25  | 6.81E-13 | 1.10E-10 | 19.64 | <a href="#">17427</a>     | meiosis-specific nuclear structural protein 1       |
| Mpp1      | 0.7497  | 9.161 | 9.136  | 4.13E-09 | 1.54E-07 | 10.87 | <a href="#">17524</a>     | membrane protein palmitoylated                      |
| Mrpl23    | 0.9266  | 9.697 | 11.75  | 3.43E-11 | 2.78E-09 | 15.71 | <a href="#">19935</a>     | mitochondrial ribosomal protein L23                 |
| Ms4a1     | -2.715  | 10.52 | -11.42 | 6.00E-11 | 4.41E-09 | 15.15 | <a href="#">12482</a>     | membrane-spanning 4-domains subfamily A member 1    |
| Ms4a4b    | -3.868  | 8.131 | -17.69 | 7.09E-15 | 3.55E-12 | 24.15 | <a href="#">60361</a>     | membrane-spanning 4-domains subfamily A member 4B   |
| Ms4a4c    | -2.809  | 8.931 | -17.59 | 7.97E-15 | 3.83E-12 | 24.03 | <a href="#">64380</a>     | membrane-spanning 4-domains subfamily A member 4C   |
| Ms4a6b    | -1.931  | 10.12 | -11.16 | 9.39E-11 | 6.42E-09 | 14.7  | <a href="#">69774</a>     | membrane-spanning 4-domains subfamily A member 6B   |
| Msh6      | 0.8206  | 7.683 | 12.08  | 1.97E-11 | 1.76E-09 | 16.27 | <a href="#">17688</a>     | mutS homolog 6 (E. coli)                            |
| Msi2      | 0.7313  | 9.47  | 8.726  | 9.44E-09 | 3.04E-07 | 10.04 | <a href="#">76626</a>     | musashi RNA-binding protein 2                       |

|        |         |       |        |          |          |       |                        |                                                             |
|--------|---------|-------|--------|----------|----------|-------|------------------------|-------------------------------------------------------------|
| Msl3   | 0.4823  | 9.604 | 9.345  | 2.73E-09 | 1.08E-07 | 11.29 | <a href="#">17692</a>  | male-specific lethal 3 homolog (Drosophila)                 |
| Mtbp   | 0.8721  | 7.736 | 8.292  | 2.32E-08 | 6.55E-07 | 9.124 | <a href="#">105837</a> | Mdm2 transformed 3T3 cell double minute p53 binding protein |
| Mtdh   | 0.9921  | 10.61 | 8.063  | 3.78E-08 | 1.01E-06 | 8.633 | <a href="#">67154</a>  | metadherin                                                  |
| Mtf2   | 0.6828  | 9.152 | 11.4   | 6.17E-11 | 4.50E-09 | 15.12 | <a href="#">17765</a>  | metal response element binding transcription factor 2       |
| Mtfr2  | 1.649   | 6.965 | 24.69  | 4.82E-18 | 1.91E-14 | 31.13 | <a href="#">71804</a>  | mitochondrial fission regulator 2                           |
| Mtor   | 1.432   | 9.215 | 14.17  | 7.59E-13 | 1.19E-10 | 19.53 | <a href="#">56717</a>  | mechanistic target of rapamycin (serine/threonine kinase)   |
| Mtss1  | 0.7951  | 9.866 | 9.051  | 4.89E-09 | 1.79E-07 | 10.7  | <a href="#">211401</a> | metastasis suppressor 1                                     |
| Mtss1l | -0.6952 | 6.825 | -12.98 | 4.59E-12 | 5.20E-10 | 17.73 | <a href="#">244654</a> | metastasis suppressor 1-like                                |
| Mxra8  | -1.232  | 7.836 | -9.22  | 3.49E-09 | 1.34E-07 | 11.04 | <a href="#">74761</a>  | matrix-remodelling associated 8                             |
| Myb    | 3.17    | 9.137 | 34     | 3.75E-21 | 1.33E-16 | 37.54 | <a href="#">17863</a>  | myeloblastosis oncogene                                     |
| Mybl2  | 1.663   | 8.194 | 11.25  | 8.04E-11 | 5.64E-09 | 14.85 | <a href="#">17865</a>  | myeloblastosis oncogene-like 2                              |
| Myo1e  | -2.357  | 8.818 | -13.75 | 1.41E-12 | 2.00E-10 | 18.91 | <a href="#">71602</a>  | myosin IE                                                   |
| Myo7a  | 1.567   | 8.094 | 17.74  | 6.60E-15 | 3.38E-12 | 24.22 | <a href="#">17921</a>  | myosin VIIA                                                 |
| Myof   | -1.695  | 7.081 | -10.64 | 2.38E-10 | 1.40E-08 | 13.76 | <a href="#">226101</a> | myoferlin                                                   |
| Myzap  | -0.8983 | 6.529 | -8.258 | 2.50E-08 | 6.97E-07 | 9.051 | <a href="#">102371</a> | myocardial zonula adherens protein                          |
| Mzb1   | 1.636   | 9.864 | 10.54  | 2.83E-10 | 1.61E-08 | 13.58 | <a href="#">69816</a>  | marginal zone B and B1 cell-specific protein 1              |
| N4bp2  | 1.062   | 8.765 | 10.81  | 1.73E-10 | 1.09E-08 | 14.08 | <a href="#">333789</a> | NEDD4 binding protein 2                                     |
| Nasp   | 1.203   | 8.158 | 10.71  | 2.07E-10 | 1.26E-08 | 13.9  | <a href="#">50927</a>  | nuclear autoantigenic sperm protein (histone-binding)       |
| Nav1   | -1.479  | 7.366 | -11.59 | 4.50E-11 | 3.46E-09 | 15.44 | <a href="#">215690</a> | neuron navigator 1                                          |



|        |         |       |        |          |          |       |                        |                                                                         |
|--------|---------|-------|--------|----------|----------|-------|------------------------|-------------------------------------------------------------------------|
| Ncapd2 | 1.65    | 8.662 | 14.17  | 7.65E-13 | 1.19E-10 | 19.52 | <a href="#">68298</a>  | non-SMC condensin I complex subunit D2                                  |
| Ncapg  | 2.411   | 7.47  | 14.35  | 5.89E-13 | 9.69E-11 | 19.78 | <a href="#">54392</a>  | non-SMC condensin I complex subunit G                                   |
| Ncapg2 | 1.998   | 7.292 | 11.25  | 8.06E-11 | 5.64E-09 | 14.85 | <a href="#">76044</a>  | non-SMC condensin II complex subunit G2                                 |
| Ncaph  | 2.168   | 8.332 | 17.94  | 5.24E-15 | 2.83E-12 | 24.44 | <a href="#">215387</a> | non-SMC condensin I complex subunit H                                   |
| Ncaph2 | 0.5809  | 8.835 | 8.183  | 2.93E-08 | 8.01E-07 | 8.89  | <a href="#">52683</a>  | non-SMC condensin II complex subunit H2                                 |
| Ncr1   | -2.346  | 7.063 | -13.21 | 3.21E-12 | 3.87E-10 | 18.09 | <a href="#">17086</a>  | natural cytotoxicity triggering receptor 1                              |
| Ndc1   | 1.482   | 8.337 | 13.88  | 1.18E-12 | 1.70E-10 | 19.09 | <a href="#">72787</a>  | NDC1 transmembrane nucleoporin                                          |
| Ndc80  | 1.485   | 7.583 | 12.18  | 1.66E-11 | 1.53E-09 | 16.44 | <a href="#">67052</a>  | NDC80 homolog kinetochore complex component ( <i>S. cerevisiae</i> )    |
| Ndrg2  | -1.872  | 7.485 | -9.669 | 1.45E-09 | 6.35E-08 | 11.93 | <a href="#">29811</a>  | N-myc downstream regulated gene 2                                       |
| Neil3  | 2.179   | 7.424 | 12.76  | 6.55E-12 | 6.99E-10 | 17.37 | <a href="#">234258</a> | nei like 3 ( <i>E. coli</i> )                                           |
| Nek2   | 1.906   | 7.602 | 15.27  | 1.61E-13 | 3.49E-11 | 21.07 | <a href="#">18005</a>  | NIMA (never in mitosis gene a)-related expressed kinase 2               |
| Nek7   | -0.6441 | 9.843 | -10.63 | 2.43E-10 | 1.41E-08 | 13.74 | <a href="#">59125</a>  | NIMA (never in mitosis gene a)-related expressed kinase 7               |
| Nfatc2 | -2.011  | 7.877 | -14.15 | 7.85E-13 | 1.20E-10 | 19.5  | <a href="#">18019</a>  | nuclear factor of activated T cells cytoplasmic calcineurin dependent 2 |
| Nfic   | -0.95   | 8.253 | -8.823 | 7.76E-09 | 2.58E-07 | 10.24 | <a href="#">18029</a>  | nuclear factor I/C                                                      |

|        |         |       |        |          |          |       |                        |                                                                           |
|--------|---------|-------|--------|----------|----------|-------|------------------------|---------------------------------------------------------------------------|
| Nkg7   | -2.254  | 9.071 | -9.452 | 2.21E-09 | 9.08E-08 | 11.51 | <a href="#">72310</a>  | natural killer cell group 7 sequence                                      |
| Nmral1 | 0.9761  | 7.508 | 11.25  | 7.99E-11 | 5.64E-09 | 14.86 | <a href="#">67824</a>  | NmrA-like family domain containing 1                                      |
| Nod1   | -1.564  | 7.849 | -14.01 | 9.69E-13 | 1.44E-10 | 19.29 | <a href="#">107607</a> | nucleotide-binding oligomerization domain containing 1                    |
| Nop16  | 0.8383  | 9.049 | 10.09  | 6.48E-10 | 3.25E-08 | 12.75 | <a href="#">28126</a>  | NOP16 nucleolar protein                                                   |
| Nop58  | 0.8357  | 9.314 | 8.557  | 1.34E-08 | 4.07E-07 | 9.683 | <a href="#">55989</a>  | NOP58 ribonucleoprotein                                                   |
| Nop9   | 0.7775  | 8.419 | 8.799  | 8.14E-09 | 2.67E-07 | 10.19 | <a href="#">67842</a>  | NOP9 nucleolar protein                                                    |
| Notch2 | -1.702  | 9.371 | -12.06 | 2.03E-11 | 1.79E-09 | 16.24 | <a href="#">18129</a>  | notch 2                                                                   |
| Npr2   | -1.171  | 5.955 | -10.25 | 4.85E-10 | 2.53E-08 | 13.04 | <a href="#">230103</a> | natriuretic peptide receptor 2                                            |
| Nr3c1  | -0.6806 | 9.09  | -9.047 | 4.93E-09 | 1.80E-07 | 10.69 | <a href="#">14815</a>  | nuclear receptor subfamily 3 group C member 1                             |
| Nrp1   | -1.985  | 7.439 | -8.647 | 1.11E-08 | 3.48E-07 | 9.872 | <a href="#">18186</a>  | neuropilin 1                                                              |
| Nsg2   | -1.278  | 7.099 | -8.676 | 1.05E-08 | 3.32E-07 | 9.931 | <a href="#">18197</a>  | neuron specific gene family member 2                                      |
| Nsl1   | 1.13    | 7.378 | 9.886  | 9.59E-10 | 4.53E-08 | 12.35 | <a href="#">381318</a> | NSL1 MIND kinetochore complex component homolog ( <i>S. cerevisiae</i> )  |
| Nt5c2  | 0.6844  | 9.059 | 9.83   | 1.07E-09 | 4.92E-08 | 12.24 | <a href="#">76952</a>  | 5-nucleotidase cytosolic II                                               |
| Nt5dc2 | 1.866   | 8.584 | 9.619  | 1.60E-09 | 6.86E-08 | 11.83 | <a href="#">70021</a>  | 5-nucleotidase domain containing 2                                        |
| Nudcd2 | 0.8962  | 7.932 | 10.63  | 2.42E-10 | 1.41E-08 | 13.74 | <a href="#">52653</a>  | NudC domain containing 2                                                  |
| Nudt21 | 0.6392  | 9.726 | 10.93  | 1.41E-10 | 9.18E-09 | 14.29 | <a href="#">68219</a>  | nudix (nucleoside diphosphate linked moiety X)-type motif 21              |
| Nuf2   | 2.202   | 7.044 | 18.1   | 4.29E-15 | 2.42E-12 | 24.64 | <a href="#">66977</a>  | NUF2 NDC80 kinetochore complex component homolog ( <i>S. cerevisiae</i> ) |

|             |         |       |        |          |          |       |                           |                                               |
|-------------|---------|-------|--------|----------|----------|-------|---------------------------|-----------------------------------------------|
| Nup107      | 0.6147  | 8.232 | 8.372  | 1.97E-08 | 5.71E-07 | 9.294 | <a href="#">103468</a>    | nucleoporin 107                               |
| Nup133      | 0.5919  | 8.45  | 8.352  | 2.05E-08 | 5.94E-07 | 9.251 | <a href="#">234865</a>    | nucleoporin 133                               |
| Nup155      | 0.8073  | 8.945 | 7.983  | 4.48E-08 | 1.16E-06 | 8.46  | <a href="#">170762</a>    | nucleoporin 155                               |
| Nup205      | 0.8754  | 9.271 | 9.194  | 3.68E-09 | 1.40E-07 | 10.99 | <a href="#">70699</a>     | nucleoporin 205                               |
| Nup210l     | 0.9774  | 6.664 | 8.91   | 6.50E-09 | 2.24E-07 | 10.41 | <a href="#">77595</a>     | nucleoporin 210-like                          |
| Nup37       | 0.642   | 7.952 | 9.119  | 4.27E-09 | 1.59E-07 | 10.84 | <a href="#">69736</a>     | nucleoporin 37                                |
| Nup43       | 0.5812  | 7.782 | 8.354  | 2.04E-08 | 5.92E-07 | 9.255 | <a href="#">69912</a>     | nucleoporin 43                                |
| Nup50       | 0.549   | 10.28 | 8.614  | 1.19E-08 | 3.69E-07 | 9.803 | <a href="#">18141</a>     | nucleoporin 50                                |
| Nup62-il4i1 | -1.756  | 7.78  | -8.841 | 7.48E-09 | 2.50E-07 | 10.27 | <a href="#">100328588</a> | Nup62-Il4i1 protein                           |
| Nup88       | 0.4955  | 9.277 | 9.346  | 2.72E-09 | 1.08E-07 | 11.29 | <a href="#">19069</a>     | nucleoporin 88                                |
| Nup93       | 0.8889  | 8.651 | 10.08  | 6.66E-10 | 3.33E-08 | 12.72 | <a href="#">71805</a>     | nucleoporin 93                                |
| Nusap1      | 1.895   | 8.165 | 10.37  | 3.86E-10 | 2.09E-08 | 13.27 | <a href="#">108907</a>    | nucleolar and spindle associated protein 1    |
| Nxt1        | 0.4711  | 8.279 | 8.573  | 1.29E-08 | 3.97E-07 | 9.718 | <a href="#">56488</a>     | NTF2-related export protein 1                 |
| Oip5        | 2.091   | 6.209 | 13.16  | 3.48E-12 | 4.13E-10 | 18.01 | <a href="#">70645</a>     | Opa interacting protein 5                     |
| Ola1        | 0.5976  | 8.889 | 8.698  | 1.00E-08 | 3.20E-07 | 9.978 | <a href="#">67059</a>     | Obg-like ATPase 1                             |
| Orc1        | 1.581   | 6.327 | 12.62  | 8.21E-12 | 8.48E-10 | 17.15 | <a href="#">18392</a>     | origin recognition complex subunit 1          |
| Orc6        | 0.8196  | 8.373 | 9.716  | 1.33E-09 | 5.88E-08 | 12.02 | <a href="#">56452</a>     | origin recognition complex subunit 6          |
| Osbpl3      | -0.9323 | 6.905 | -8.494 | 1.52E-08 | 4.58E-07 | 9.552 | <a href="#">71720</a>     | oxysterol binding protein-like 3              |
| Otub2       | 1.812   | 7.845 | 14.44  | 5.12E-13 | 8.70E-11 | 19.92 | <a href="#">68149</a>     | OTU domain ubiquitin aldehyde binding 2       |
| Pa2g4       | 0.9185  | 10.06 | 9.369  | 2.60E-09 | 1.04E-07 | 11.34 | <a href="#">18813</a>     | proliferation-associated 2G4                  |
| Pacs1       | -1.131  | 9.041 | -9.858 | 1.01E-09 | 4.71E-08 | 12.3  | <a href="#">107975</a>    | phosphofurin acidic cluster sorting protein 1 |
| Palld       | -0.767  | 6.434 | -9.824 | 1.08E-09 | 4.97E-08 | 12.23 | <a href="#">72333</a>     | palladin cytoskeletal associated protein      |

|        |         |       |        |          |          |       |                        |                                                                  |
|--------|---------|-------|--------|----------|----------|-------|------------------------|------------------------------------------------------------------|
| Papss2 | -1.852  | 7.033 | -8.466 | 1.62E-08 | 4.81E-07 | 9.492 | <a href="#">23972</a>  | 3-phosphoadenosine 5-phosphosulfate synthase 2                   |
| Pard3b | -0.6612 | 6.595 | -8.331 | 2.14E-08 | 6.12E-07 | 9.208 | <a href="#">72823</a>  | par-3 family cell polarity regulator beta                        |
| Parpbp | 1.615   | 6.439 | 13.2   | 3.30E-12 | 3.96E-10 | 18.06 | <a href="#">75317</a>  | PARP1 binding protein                                            |
| Pask   | 1.359   | 6.874 | 16.25  | 4.30E-14 | 1.33E-11 | 22.38 | <a href="#">269224</a> | PAS domain containing serine/threonine kinase                    |
| Paxip1 | 0.7658  | 8.702 | 8.62   | 1.18E-08 | 3.66E-07 | 9.815 | <a href="#">55982</a>  | PAX interacting (with transcription-activation domain) protein 1 |
| Pbk    | 2.15    | 7     | 13.7   | 1.54E-12 | 2.11E-10 | 18.83 | <a href="#">52033</a>  | PDZ binding kinase                                               |
| Pcna   | 0.7063  | 11.25 | 8.071  | 3.71E-08 | 9.91E-07 | 8.651 | <a href="#">18538</a>  | proliferating cell nuclear antigen                               |
| Pdcd4  | -1.202  | 10.7  | -8.664 | 1.07E-08 | 3.38E-07 | 9.907 | <a href="#">18569</a>  | programmed cell death 4                                          |
| Pde10a | 1.669   | 7.066 | 8.582  | 1.27E-08 | 3.90E-07 | 9.736 | <a href="#">23984</a>  | phosphodiesterase 10A                                            |
| Pde2a  | 2.174   | 10.56 | 22.27  | 4.72E-17 | 1.12E-13 | 28.98 | <a href="#">207728</a> | phosphodiesterase 2A cGMP-stimulated                             |
| Pdgfb  | -0.5861 | 7.21  | -8.028 | 4.07E-08 | 1.07E-06 | 8.557 | <a href="#">18591</a>  | platelet derived growth factor B polypeptide                     |
| Pdk3   | 0.5711  | 8.138 | 10.17  | 5.59E-10 | 2.84E-08 | 12.9  | <a href="#">236900</a> | pyruvate dehydrogenase kinase isoenzyme 3                        |
| Pdlim4 | -0.6984 | 7.186 | -9.546 | 1.84E-09 | 7.79E-08 | 11.69 | <a href="#">30794</a>  | PDZ and LIM domain 4                                             |
| Pdss1  | 1.05    | 7.188 | 9.586  | 1.71E-09 | 7.27E-08 | 11.77 | <a href="#">56075</a>  | prenyl (solanesyl) diphosphate synthase subunit 1                |
| Pelo   | 0.7884  | 7.614 | 8.407  | 1.83E-08 | 5.35E-07 | 9.368 | <a href="#">105083</a> | pelota homolog (Drosophila)                                      |
| Pfas   | 0.8289  | 8.278 | 8.586  | 1.26E-08 | 3.87E-07 | 9.745 | <a href="#">237823</a> | phosphoribosylformylglycinamide synthase (FGAR amidotransferase) |

|         |         |       |        |          |          |       |                        |                                                                                             |
|---------|---------|-------|--------|----------|----------|-------|------------------------|---------------------------------------------------------------------------------------------|
| Pgap1   | -1.22   | 6.226 | -10.1  | 6.46E-10 | 3.24E-08 | 12.75 | <a href="#">241062</a> | post-GPI attachment to proteins 1                                                           |
| Phf1    | -1.241  | 8.692 | -10.53 | 2.89E-10 | 1.62E-08 | 13.56 | <a href="#">21652</a>  | PHD finger protein 1                                                                        |
| Phf19   | 1.075   | 7.404 | 12.31  | 1.35E-11 | 1.28E-09 | 16.64 | <a href="#">74016</a>  | PHD finger protein 19                                                                       |
| Phf5a   | 0.8619  | 8.82  | 8.417  | 1.79E-08 | 5.26E-07 | 9.389 | <a href="#">68479</a>  | PHD finger protein 5A                                                                       |
| Pif1    | 1.317   | 6.51  | 14.61  | 4.03E-13 | 7.32E-11 | 20.16 | <a href="#">208084</a> | PIF1 5-to-3 DNA helicase homolog (S. cerevisiae)                                            |
| Pik3cb  | -1.507  | 7.883 | -9.154 | 3.98E-09 | 1.50E-07 | 10.91 | <a href="#">74769</a>  | phosphatidylinositol 3-kinase catalytic beta polypeptide                                    |
| Pitpnc1 | -1.273  | 8.876 | -9.771 | 1.19E-09 | 5.42E-08 | 12.13 | <a href="#">71795</a>  | phosphatidylinositol transfer protein cytoplasmic 1                                         |
| Pkib    | -0.7787 | 6.897 | -8.815 | 7.88E-09 | 2.61E-07 | 10.22 | <a href="#">18768</a>  | protein kinase inhibitor beta cAMP dependent testis specific                                |
| Pkig    | 0.9194  | 7.96  | 10.7   | 2.14E-10 | 1.29E-08 | 13.87 | <a href="#">18769</a>  | protein kinase inhibitor gamma                                                              |
| Plac8   | 1.286   | 10.07 | 8.474  | 1.59E-08 | 4.75E-07 | 9.508 | <a href="#">231507</a> | placenta-specific 8                                                                         |
| Plbd1   | -1.854  | 9.878 | -8.031 | 4.05E-08 | 1.07E-06 | 8.562 | <a href="#">66857</a>  | phospholipase B domain containing 1                                                         |
| Pld2    | -0.8739 | 7.225 | -7.975 | 4.56E-08 | 1.18E-06 | 8.441 | <a href="#">18806</a>  | phospholipase D2                                                                            |
| Plekha1 | -1.024  | 8.31  | -9.81  | 1.11E-09 | 5.08E-08 | 12.2  | <a href="#">101476</a> | pleckstrin homology domain containing family A (phosphoinositide binding specific) member 1 |
| Plk1    | 2.258   | 9.004 | 18.14  | 4.12E-15 | 2.36E-12 | 24.68 | <a href="#">18817</a>  | polo-like kinase 1                                                                          |
| Plk4    | 1.319   | 7.521 | 8.914  | 6.45E-09 | 2.23E-07 | 10.42 | <a href="#">20873</a>  | polo-like kinase 4                                                                          |
| Plp2    | 0.7659  | 11.25 | 8.868  | 7.08E-09 | 2.40E-07 | 10.33 | <a href="#">18824</a>  | proteolipid protein 2                                                                       |
| Plscr3  | 1.637   | 8.358 | 25.4   | 2.58E-18 | 1.31E-14 | 31.71 | <a href="#">70310</a>  | phospholipid scramblase 3                                                                   |
| Pmf1    | 1.039   | 8.003 | 11.49  | 5.27E-11 | 3.98E-09 | 15.28 | <a href="#">67037</a>  | polyamine-modulated factor 1                                                                |
| Pnp     | 2.581   | 9.302 | 20.62  | 2.54E-16 | 3.82E-13 | 27.38 | <a href="#">18950</a>  | purine-nucleoside phosphorylase                                                             |

|         |        |       |        |          |          |       |                        |                                                                     |
|---------|--------|-------|--------|----------|----------|-------|------------------------|---------------------------------------------------------------------|
| Pnp2    | 2.66   | 10.26 | 23.3   | 1.73E-17 | 4.74E-14 | 29.93 | <a href="#">667034</a> | purine-nucleoside phosphorylase 2                                   |
| Poc1a   | 1.014  | 6.943 | 14.21  | 7.16E-13 | 1.14E-10 | 19.59 | <a href="#">70235</a>  | POC1 centriolar protein homolog A (Chlamydomonas)                   |
| Pola1   | 1.431  | 7.894 | 12.39  | 1.19E-11 | 1.15E-09 | 16.78 | <a href="#">18968</a>  | polymerase (DNA directed) alpha 1                                   |
| Pola2   | 0.8378 | 8.718 | 9.242  | 3.35E-09 | 1.29E-07 | 11.09 | <a href="#">18969</a>  | polymerase (DNA directed) alpha 2                                   |
| Pole    | 1.675  | 8.164 | 12.33  | 1.31E-11 | 1.25E-09 | 16.68 | <a href="#">18973</a>  | polymerase (DNA directed) epsilon                                   |
| Pole2   | 1.221  | 7.877 | 15.97  | 6.26E-14 | 1.72E-11 | 22.01 | <a href="#">18974</a>  | polymerase (DNA directed) epsilon 2 (p59 subunit)                   |
| Polq    | 1.309  | 6.927 | 10.09  | 6.58E-10 | 3.29E-08 | 12.73 | <a href="#">77782</a>  | polymerase (DNA directed) theta                                     |
| Pop1    | 0.9355 | 6.878 | 8.904  | 6.57E-09 | 2.26E-07 | 10.4  | <a href="#">67724</a>  | processing of precursor 1 ribonuclease P/MRP family (S. cerevisiae) |
| Pou2af1 | 0.8098 | 10.84 | 9.734  | 1.28E-09 | 5.74E-08 | 12.06 | <a href="#">18985</a>  | POU domain class 2 associating factor 1                             |
| Pou6f1  | -1.192 | 7.671 | -9.863 | 1.00E-09 | 4.67E-08 | 12.31 | <a href="#">19009</a>  | POU domain class 6 transcription factor 1                           |
| Ppfibp2 | -1.136 | 7.33  | -9.439 | 2.27E-09 | 9.28E-08 | 11.48 | <a href="#">19024</a>  | PTPRF interacting protein binding protein 2 (liprin beta 2)         |
| Ppil1   | 1.43   | 7.788 | 12.18  | 1.67E-11 | 1.53E-09 | 16.44 | <a href="#">68816</a>  | peptidylprolyl isomerase (cyclophilin)-like 1                       |
| Ppm1e   | 1.483  | 7.515 | 19.78  | 6.35E-16 | 7.28E-13 | 26.49 | <a href="#">320472</a> | protein phosphatase 1E (PP2C domain containing)                     |
| Ppm1h   | -1.644 | 7.555 | -14.18 | 7.47E-13 | 1.18E-10 | 19.54 | <a href="#">319468</a> | protein phosphatase 1H (PP2C domain containing)                     |

|          |         |       |        |          |          |       |                        |                                                            |
|----------|---------|-------|--------|----------|----------|-------|------------------------|------------------------------------------------------------|
| Ppp1cc   | 0.3856  | 11.1  | 8.751  | 8.97E-09 | 2.90E-07 | 10.09 | <a href="#">19047</a>  | protein phosphatase 1 catalytic subunit gamma isoform      |
| Ppp1r13b | -1.373  | 8.723 | -8.292 | 2.32E-08 | 6.55E-07 | 9.125 | <a href="#">21981</a>  | protein phosphatase 1 regulatory (inhibitor) subunit 13B   |
| Ppp1r14b | 0.9968  | 9.237 | 9.86   | 1.01E-09 | 4.70E-08 | 12.3  | <a href="#">18938</a>  | protein phosphatase 1 regulatory (inhibitor) subunit 14B   |
| Ppp2r4   | 0.516   | 9.592 | 10.21  | 5.19E-10 | 2.66E-08 | 12.97 | <a href="#">110854</a> | protein phosphatase 2A activator regulatory subunit B      |
| Ppt2     | -0.7093 | 7.626 | -9     | 5.42E-09 | 1.95E-07 | 10.6  | <a href="#">54397</a>  | palmitoyl-protein thioesterase 2                           |
| Prc1     | 2.022   | 7.708 | 14.61  | 4.07E-13 | 7.34E-11 | 20.15 | <a href="#">233406</a> | protein regulator of cytokinesis 1                         |
| Prep     | 1.204   | 10.15 | 11.68  | 3.83E-11 | 3.04E-09 | 15.6  | <a href="#">19072</a>  | prolyl endopeptidase                                       |
| Prf1     | -1.402  | 8.109 | -10.61 | 2.49E-10 | 1.44E-08 | 13.71 | <a href="#">18646</a>  | perforin 1 (pore forming protein)                          |
| Prim1    | 1.451   | 8.189 | 15.1   | 2.03E-13 | 4.28E-11 | 20.84 | <a href="#">19075</a>  | DNA primase p49 subunit                                    |
| Prim2    | 1.418   | 8.772 | 16.1   | 5.23E-14 | 1.48E-11 | 22.18 | <a href="#">19076</a>  | DNA primase p58 subunit                                    |
| Prkag2   | -0.8814 | 7.614 | -8.155 | 3.11E-08 | 8.43E-07 | 8.83  | <a href="#">108099</a> | protein kinase AMP-activated gamma 2 non-catalytic subunit |
| Prkch    | -2.693  | 8.433 | -12.02 | 2.17E-11 | 1.89E-09 | 16.17 | <a href="#">18755</a>  | protein kinase C eta                                       |
| Prkcq    | -2.894  | 9.132 | -11.28 | 7.59E-11 | 5.39E-09 | 14.91 | <a href="#">18761</a>  | protein kinase C theta                                     |
| Prkcsh   | 0.5169  | 9.043 | 8.281  | 2.38E-08 | 6.68E-07 | 9.101 | <a href="#">19089</a>  | protein kinase C substrate 80K-H                           |
| Prm1     | 0.7594  | 6.454 | 9.569  | 1.76E-09 | 7.47E-08 | 11.74 | <a href="#">19118</a>  | protamine 1                                                |
| Prmt1    | 0.778   | 8.923 | 10.02  | 7.40E-10 | 3.61E-08 | 12.61 | <a href="#">15469</a>  | protein arginine N-methyltransferase 1                     |
| Procr    | -0.9825 | 7.005 | -8.804 | 8.05E-09 | 2.66E-07 | 10.2  | <a href="#">19124</a>  | protein C receptor endothelial                             |
| Prr11    | 2.32    | 7.306 | 19.24  | 1.15E-15 | 9.30E-13 | 25.92 | <a href="#">270906</a> | proline rich 11                                            |
| Prr5l    | -1.36   | 6.143 | -10.69 | 2.17E-10 | 1.30E-08 | 13.85 | <a href="#">72446</a>  | proline rich 5 like                                        |

|           |         |       |        |          |          |       |                        |                                                         |
|-----------|---------|-------|--------|----------|----------|-------|------------------------|---------------------------------------------------------|
| Psat1     | 1.309   | 8.621 | 9.989  | 7.90E-10 | 3.83E-08 | 12.55 | <a href="#">107272</a> | phosphoserine aminotransferase 1                        |
| Psmc1     | 0.5536  | 9.072 | 8.882  | 6.88E-09 | 2.35E-07 | 10.36 | <a href="#">19179</a>  | protease (prosome macropain) 26S subunit ATPase 1       |
| Psmc1     | 0.5846  | 9.618 | 8.013  | 4.21E-08 | 1.10E-06 | 8.524 | <a href="#">70247</a>  | proteasome (prosome macropain) 26S subunit non-ATPase 1 |
| Ptgr1     | 3.974   | 7.922 | 18.64  | 2.28E-15 | 1.65E-12 | 25.26 | <a href="#">67103</a>  | prostaglandin reductase 1                               |
| Ptma      | 0.6015  | 11.99 | 10.13  | 6.03E-10 | 3.04E-08 | 12.82 | <a href="#">19231</a>  | prothymosin alpha                                       |
| Ptp4a3    | 0.7962  | 10.14 | 9.859  | 1.01E-09 | 4.70E-08 | 12.3  | <a href="#">19245</a>  | protein tyrosine phosphatase 4a3                        |
| Ptpn14    | -1.574  | 8.551 | -10.64 | 2.36E-10 | 1.39E-08 | 13.77 | <a href="#">19250</a>  | protein tyrosine phosphatase non-receptor type 14       |
| Ptpn21    | -0.6397 | 6.31  | -9.194 | 3.68E-09 | 1.40E-07 | 10.99 | <a href="#">24000</a>  | protein tyrosine phosphatase non-receptor type 21       |
| Ptpn9     | 0.7028  | 8.248 | 10.6   | 2.53E-10 | 1.46E-08 | 13.7  | <a href="#">56294</a>  | protein tyrosine phosphatase non-receptor type 9        |
| Pttg1     | 1.199   | 7.804 | 11.54  | 4.88E-11 | 3.71E-09 | 15.36 | <a href="#">30939</a>  | pituitary tumor-transforming gene 1                     |
| Pus10     | 0.7338  | 8.222 | 10.75  | 1.96E-10 | 1.21E-08 | 13.95 | <a href="#">74467</a>  | pseudouridylate synthase 10                             |
| Pxdc1     | -2.246  | 8.317 | -9.186 | 3.74E-09 | 1.42E-07 | 10.97 | <a href="#">66895</a>  | PX domain containing 1                                  |
| Rab11fip4 | -1.121  | 7.327 | -11.44 | 5.75E-11 | 4.27E-09 | 15.19 | <a href="#">268451</a> | RAB11 family interacting protein 4 (class II)           |
| Rab30     | -1.923  | 7.888 | -9.22  | 3.49E-09 | 1.34E-07 | 11.04 | <a href="#">75985</a>  | RAB30 member RAS oncogene family                        |
| Rab37     | -1.159  | 7.752 | -8.817 | 7.85E-09 | 2.60E-07 | 10.22 | <a href="#">58222</a>  | RAB37 member RAS oncogene family                        |
| Rabgef1   | -0.4804 | 8.601 | -8.006 | 4.27E-08 | 1.12E-06 | 8.508 | <a href="#">56715</a>  | RAB guanine nucleotide exchange factor (GEF) 1          |



|          |         |       |        |          |          |       |                        |                                                                 |
|----------|---------|-------|--------|----------|----------|-------|------------------------|-----------------------------------------------------------------|
| Racgap1  | 1.818   | 8.364 | 13.41  | 2.38E-12 | 3.04E-10 | 18.39 | <a href="#">26934</a>  | Rac GTPase-activating protein 1                                 |
| Rad51    | 1.351   | 7.009 | 16.15  | 4.95E-14 | 1.42E-11 | 22.24 | <a href="#">19361</a>  | RAD51 homolog                                                   |
| Rad51ap1 | 1.368   | 6.145 | 13.37  | 2.53E-12 | 3.19E-10 | 18.33 | <a href="#">19362</a>  | RAD51 associated protein 1                                      |
| Rad51b   | 0.9546  | 6.166 | 9.677  | 1.43E-09 | 6.28E-08 | 11.95 | <a href="#">19363</a>  | RAD51 homolog B                                                 |
| Rad54b   | 1.654   | 6.272 | 14.81  | 3.03E-13 | 5.89E-11 | 20.44 | <a href="#">623474</a> | RAD54 homolog B ( <i>S. cerevisiae</i> )                        |
| Rad54l   | 1.8     | 7.187 | 15.92  | 6.68E-14 | 1.80E-11 | 21.94 | <a href="#">19366</a>  | RAD54 like ( <i>S. cerevisiae</i> )                             |
| Raet1d   | 1.476   | 5.374 | 8.757  | 8.87E-09 | 2.88E-07 | 10.1  | <a href="#">56554</a>  | retinoic acid early transcript delta                            |
| Rag1     | 4.928   | 7.731 | 26.64  | 8.90E-19 | 7.91E-15 | 32.69 | <a href="#">19373</a>  | recombination activating gene 1                                 |
| Rag2     | 2.956   | 5.386 | 21.28  | 1.28E-16 | 2.17E-13 | 28.03 | <a href="#">19374</a>  | recombination activating gene 2                                 |
| Ran      | 0.8093  | 9.383 | 8.46   | 1.64E-08 | 4.86E-07 | 9.48  | <a href="#">19384</a>  | RAN member RAS oncogene family                                  |
| Ranbp1   | 0.779   | 10.17 | 10.53  | 2.91E-10 | 1.64E-08 | 13.55 | <a href="#">19385</a>  | RAN binding protein 1                                           |
| Rapgef2  | -0.6507 | 8.27  | -8.283 | 2.37E-08 | 6.67E-07 | 9.104 | <a href="#">76089</a>  | Rap guanine nucleotide exchange factor (GEF) 2                  |
| Raph1    | -1.226  | 6.729 | -8.592 | 1.24E-08 | 3.83E-07 | 9.757 | <a href="#">77300</a>  | Ras association (RalGDS/AF-6) and pleckstrin homology domains 1 |
| Rarg     | -1.062  | 7.629 | -13    | 4.51E-12 | 5.12E-10 | 17.75 | <a href="#">19411</a>  | retinoic acid receptor gamma                                    |
| Rasal1   | -0.7831 | 7.41  | -8.104 | 3.46E-08 | 9.31E-07 | 8.721 | <a href="#">19415</a>  | RAS protein activator like 1 (GAP1 like)                        |
| Rasgef1a | -0.7996 | 6.259 | -8.005 | 4.28E-08 | 1.12E-06 | 8.507 | <a href="#">70727</a>  | RasGEF domain family member 1A                                  |
| Rasgef1b | -2.247  | 7.741 | -10.53 | 2.87E-10 | 1.62E-08 | 13.57 | <a href="#">320292</a> | RasGEF domain family member 1B                                  |
| Rasgrp3  | -3.097  | 9.066 | -15.27 | 1.61E-13 | 3.49E-11 | 21.07 | <a href="#">240168</a> | RAS guanyl releasing protein 3                                  |
| Raver2   | -1.554  | 7.022 | -11.48 | 5.39E-11 | 4.06E-09 | 15.26 | <a href="#">242570</a> | ribonucleoprotein PTB-binding 2                                 |

|        |         |       |        |          |          |       |                        |                                                              |
|--------|---------|-------|--------|----------|----------|-------|------------------------|--------------------------------------------------------------|
| Rbbp8  | 1.186   | 7.796 | 9.503  | 2.00E-09 | 8.31E-08 | 11.61 | <a href="#">225182</a> | retinoblastoma binding protein 8                             |
| Rbl2   | -0.8735 | 9.047 | -11.05 | 1.13E-10 | 7.51E-09 | 14.51 | <a href="#">19651</a>  | retinoblastoma-like 2                                        |
| Rbm17  | 0.5917  | 8.273 | 8.119  | 3.35E-08 | 9.05E-07 | 8.753 | <a href="#">76938</a>  | RNA binding motif protein 17                                 |
| Rbmxl1 | 0.9821  | 10.72 | 13.4   | 2.43E-12 | 3.08E-10 | 18.37 | <a href="#">19656</a>  | RNA binding motif protein X linked-like-1                    |
| Rcc1   | 0.9054  | 8.365 | 10.57  | 2.68E-10 | 1.54E-08 | 13.64 | <a href="#">100088</a> | regulator of chromosome condensation 1                       |
| Rcc2   | 1.089   | 10.04 | 10.88  | 1.55E-10 | 9.88E-09 | 14.19 | <a href="#">108911</a> | regulator of chromosome condensation 2                       |
| Rcn3   | -1.5    | 7.024 | -8.211 | 2.76E-08 | 7.62E-07 | 8.951 | <a href="#">52377</a>  | reticulocalbin 3 EF-hand calcium binding domain              |
| Rdh12  | 1.17    | 7.938 | 9.477  | 2.11E-09 | 8.66E-08 | 11.55 | <a href="#">77974</a>  | retinol dehydrogenase 12                                     |
| Recql4 | 0.8191  | 6.819 | 10.11  | 6.35E-10 | 3.19E-08 | 12.77 | <a href="#">79456</a>  | RecQ protein-like 4                                          |
| Relb   | -0.8035 | 7.916 | -8.305 | 2.26E-08 | 6.42E-07 | 9.152 | <a href="#">19698</a>  | avian reticuloendotheliosis viral (v-rel) oncogene related B |
| Rfc3   | 1.375   | 7.984 | 14.44  | 5.14E-13 | 8.70E-11 | 19.92 | <a href="#">69263</a>  | replication factor C (activator 1) 3                         |
| Rfc4   | 1.143   | 8.765 | 16.93  | 1.81E-14 | 6.90E-12 | 23.23 | <a href="#">106344</a> | replication factor C (activator 1) 4                         |
| Rfwd3  | 0.8968  | 9.226 | 11.8   | 3.11E-11 | 2.59E-09 | 15.81 | <a href="#">234736</a> | ring finger and WD repeat domain 3                           |
| Rgs13  | -2.552  | 5.864 | -9.056 | 4.84E-09 | 1.77E-07 | 10.71 | <a href="#">246709</a> | regulator of G-protein signaling 13                          |
| Rgs16  | 1.712   | 8.343 | 8.337  | 2.12E-08 | 6.08E-07 | 9.22  | <a href="#">19734</a>  | regulator of G-protein signaling 16                          |
| Rgs3   | -0.6395 | 6.713 | -8.89  | 6.77E-09 | 2.32E-07 | 10.37 | <a href="#">50780</a>  | regulator of G-protein signaling 3                           |

|          |         |       |        |          |          |       |                        |                                                               |
|----------|---------|-------|--------|----------|----------|-------|------------------------|---------------------------------------------------------------|
| Rhno1    | 0.7676  | 8.3   | 10.21  | 5.21E-10 | 2.66E-08 | 12.97 | <a href="#">72440</a>  | RAD9-HUS1-RAD1 interacting nuclear orphan 1                   |
| Rhof     | -1.314  | 8.724 | -8.868 | 7.08E-09 | 2.40E-07 | 10.33 | <a href="#">23912</a>  | ras homolog gene family member f                              |
| Rinl     | -1.355  | 8.138 | -8.957 | 5.91E-09 | 2.08E-07 | 10.51 | <a href="#">320435</a> | Ras and Rab interactor-like                                   |
| Rnase12  | 1.626   | 5.865 | 8.08   | 3.65E-08 | 9.74E-07 | 8.669 | <a href="#">497106</a> | ribonuclease RNase A family 12 (non-active)                   |
| Rnaseh2b | 0.7331  | 7.453 | 8.016  | 4.18E-08 | 1.10E-06 | 8.53  | <a href="#">67153</a>  | ribonuclease H2 subunit B                                     |
| Rnd3     | -1.457  | 7.198 | -9.592 | 1.69E-09 | 7.21E-08 | 11.78 | <a href="#">74194</a>  | Rho family GTPase 3                                           |
| Rnf157   | 1.247   | 8.484 | 12     | 2.24E-11 | 1.93E-09 | 16.14 | <a href="#">217340</a> | ring finger protein 157                                       |
| Rnf26    | 0.7759  | 8.728 | 12.01  | 2.22E-11 | 1.93E-09 | 16.15 | <a href="#">213211</a> | ring finger protein 26                                        |
| Rnf43    | -1.026  | 7.356 | -12.2  | 1.60E-11 | 1.48E-09 | 16.48 | <a href="#">207742</a> | ring finger protein 43                                        |
| Rnmt     | 0.5352  | 7.932 | 8.44   | 1.71E-08 | 5.04E-07 | 9.437 | <a href="#">67897</a>  | RNA (guanine-7-) methyltransferase                            |
| Rora     | -1.501  | 7.012 | -13.17 | 3.42E-12 | 4.06E-10 | 18.03 | <a href="#">19883</a>  | RAR-related orphan receptor alpha                             |
| Rpa2     | 0.746   | 8.574 | 8.413  | 1.81E-08 | 5.30E-07 | 9.38  | <a href="#">19891</a>  | replication protein A2                                        |
| Rps6ka3  | -0.8719 | 9.314 | -9.291 | 3.03E-09 | 1.19E-07 | 11.19 | <a href="#">110651</a> | ribosomal protein S6 kinase polypeptide 3                     |
| Rqcd1    | 0.6581  | 9.609 | 9.257  | 3.25E-09 | 1.26E-07 | 11.12 | <a href="#">58184</a>  | rcd1 (required for cell differentiation) homolog 1 (S. pombe) |
| Rras     | -1.223  | 9.385 | -8.891 | 6.75E-09 | 2.31E-07 | 10.38 | <a href="#">20130</a>  | Harvey rat sarcoma oncogene subgroup R                        |
| Rrm1     | 1.456   | 9.522 | 14.95  | 2.51E-13 | 5.08E-11 | 20.63 | <a href="#">20133</a>  | ribonucleotide reductase M1                                   |
| Rrm2     | 2.152   | 9.233 | 14.52  | 4.60E-13 | 8.06E-11 | 20.03 | <a href="#">20135</a>  | ribonucleotide reductase M2                                   |
| Rtca     | 0.5587  | 8.923 | 9.743  | 1.26E-09 | 5.65E-08 | 12.08 | <a href="#">66368</a>  | RNA 3-terminal phosphate cyclase                              |
| Rtkn2    | 0.9644  | 5.625 | 11.31  | 7.21E-11 | 5.14E-09 | 14.96 | <a href="#">170799</a> | rhotekin 2                                                    |

|        |         |       |        |          |          |       |                        |                                                                                    |
|--------|---------|-------|--------|----------|----------|-------|------------------------|------------------------------------------------------------------------------------|
| Ruvbl2 | 0.7303  | 8.471 | 9.148  | 4.03E-09 | 1.51E-07 | 10.9  | <a href="#">20174</a>  | RuvB-like protein 2                                                                |
| S1pr1  | -1.32   | 9.15  | -8.145 | 3.17E-08 | 8.57E-07 | 8.809 | <a href="#">13609</a>  | sphingosine-1-phosphate receptor 1                                                 |
| Sae1   | 1.282   | 9.848 | 10.57  | 2.69E-10 | 1.54E-08 | 13.63 | <a href="#">56459</a>  | SUMO1 activating enzyme subunit 1                                                  |
| Samd3  | -1.043  | 6.149 | -9.152 | 4.00E-09 | 1.50E-07 | 10.91 | <a href="#">268288</a> | sterile alpha motif domain containing 3                                            |
| Samhd1 | -0.9525 | 10.72 | -8.669 | 1.06E-08 | 3.35E-07 | 9.918 | <a href="#">56045</a>  | SAM domain and HD domain 1                                                         |
| Sap30  | 1.44    | 7.767 | 10.89  | 1.52E-10 | 9.72E-09 | 14.21 | <a href="#">60406</a>  | sin3 associated polypeptide                                                        |
| Sapcd2 | 0.633   | 7.763 | 9.231  | 3.42E-09 | 1.32E-07 | 11.07 | <a href="#">72080</a>  | suppressor APC domain containing 2                                                 |
| Sass6  | 1.108   | 8.108 | 10.78  | 1.85E-10 | 1.15E-08 | 14.01 | <a href="#">72776</a>  | spindle assembly 6 homolog (C. elegans)                                            |
| Satb2  | 2.621   | 6.816 | 10.31  | 4.35E-10 | 2.31E-08 | 13.15 | <a href="#">212712</a> | special AT-rich sequence binding protein 2                                         |
| Scaper | -0.8444 | 8.471 | -8.055 | 3.84E-08 | 1.02E-06 | 8.616 | <a href="#">244891</a> | S phase cyclin A-associated protein in the ER                                      |
| Scn11a | 1.353   | 6.036 | 11.19  | 8.85E-11 | 6.12E-09 | 14.76 | <a href="#">24046</a>  | sodium channel voltage-gated type XI alpha                                         |
| Scn1b  | -0.7197 | 7.075 | -9.376 | 2.57E-09 | 1.03E-07 | 11.36 | <a href="#">20266</a>  | sodium channel voltage-gated type I beta                                           |
| Scn4b  | 2.274   | 7.163 | 8.601  | 1.22E-08 | 3.77E-07 | 9.776 | <a href="#">399548</a> | sodium channel type IV beta                                                        |
| Sdc4   | 0.9817  | 9.668 | 8.555  | 1.34E-08 | 4.08E-07 | 9.679 | <a href="#">20971</a>  | syndecan 4                                                                         |
| Sema3g | 1.004   | 6.994 | 8.946  | 6.05E-09 | 2.11E-07 | 10.49 | <a href="#">218877</a> | sema domain immunoglobulin domain (Ig) short basic domain secreted (semaphorin) 3G |
| Sema4f | -1.359  | 6.717 | -9.033 | 5.07E-09 | 1.84E-07 | 10.67 | <a href="#">20355</a>  | sema domain immunoglobulin domain (Ig) TM domain and short cytoplasmic domain      |

|          |         |       |        |          |          |       |                        |                                                           |
|----------|---------|-------|--------|----------|----------|-------|------------------------|-----------------------------------------------------------|
| Sephs1   | 0.9312  | 8.931 | 10.72  | 2.04E-10 | 1.25E-08 | 13.91 | <a href="#">109079</a> | selenophosphate synthetase 1                              |
| 4-Sep    | -0.876  | 6.426 | -8.205 | 2.80E-08 | 7.69E-07 | 8.937 | <a href="#">18952</a>  | septin 4                                                  |
| Serpinb9 | -1.736  | 7.534 | -9.8   | 1.13E-09 | 5.16E-08 | 12.18 | <a href="#">20723</a>  | serine (or cysteine) peptidase inhibitor clade B member 9 |
| Sf3a3    | 0.6463  | 9.28  | 7.976  | 4.55E-08 | 1.18E-06 | 8.445 | <a href="#">75062</a>  | splicing factor 3a subunit 3                              |
| Sfxn5    | -1.183  | 7.567 | -7.979 | 4.52E-08 | 1.17E-06 | 8.451 | <a href="#">94282</a>  | sideroflexin 5                                            |
| Sgol1    | 1.892   | 7.278 | 14.25  | 6.80E-13 | 1.10E-10 | 19.64 | <a href="#">72415</a>  | shugoshin-like 1 (S. pombe)                               |
| Sgol2    | 1.661   | 7.371 | 13.05  | 4.15E-12 | 4.81E-10 | 17.83 | <a href="#">68549</a>  | shugoshin-like 2 (S. pombe)                               |
| Sh2b2    | -1.471  | 8.081 | -9.225 | 3.46E-09 | 1.33E-07 | 11.05 | <a href="#">23921</a>  | SH2B adaptor protein 2                                    |
| Sh2d1a   | -2.094  | 6.676 | -11.28 | 7.57E-11 | 5.39E-09 | 14.91 | <a href="#">20400</a>  | SH2 domain protein 1A                                     |
| Shank1   | -1.041  | 6.618 | -11.17 | 9.27E-11 | 6.36E-09 | 14.71 | <a href="#">243961</a> | SH3/ankyrin domain gene 1                                 |
| Shcbp1   | 2.59    | 6.459 | 21.6   | 9.21E-17 | 1.72E-13 | 28.35 | <a href="#">20419</a>  | Shc SH2-domain binding protein 1                          |
| She      | -0.5785 | 6.804 | -8.508 | 1.48E-08 | 4.45E-07 | 9.581 | <a href="#">214547</a> | src homology 2 domain-containing transforming protein E   |
| Sidt1    | -3.103  | 8.554 | -18.42 | 2.96E-15 | 1.95E-12 | 25    | <a href="#">320007</a> | SID1 transmembrane family member 1                        |
| Siglech  | -2.235  | 8.19  | -9.407 | 2.42E-09 | 9.75E-08 | 11.42 | <a href="#">233274</a> | sialic acid binding Ig-like lectin H                      |
| Siva1    | 0.6513  | 7.862 | 8.336  | 2.12E-08 | 6.09E-07 | 9.218 | <a href="#">30954</a>  | SIVA1 apoptosis-inducing factor                           |
| Ska1     | 1.072   | 6.378 | 8.655  | 1.09E-08 | 3.43E-07 | 9.888 | <a href="#">66468</a>  | spindle and kinetochore associated complex subunit 1      |
| Ska2     | 0.9834  | 8.165 | 10.23  | 5.05E-10 | 2.61E-08 | 13    | <a href="#">66140</a>  | spindle and kinetochore associated complex subunit 2      |
| Ska3     | 2.121   | 7.094 | 12.82  | 5.94E-12 | 6.45E-10 | 17.47 | <a href="#">219114</a> | spindle and kinetochore associated complex subunit 3      |
| Skap1    | -2.239  | 8.013 | -8.916 | 6.43E-09 | 2.23E-07 | 10.43 | <a href="#">78473</a>  | src family associated phosphoprotein 1                    |

|          |        |       |        |          |          |       |                        |                                                                                            |
|----------|--------|-------|--------|----------|----------|-------|------------------------|--------------------------------------------------------------------------------------------|
| Ski      | -1.015 | 9.284 | -10.62 | 2.44E-10 | 1.42E-08 | 13.73 | <a href="#">20481</a>  | ski sarcoma viral oncogene homolog (avian)                                                 |
| Skp2     | 1.192  | 7.658 | 12.11  | 1.87E-11 | 1.68E-09 | 16.32 | <a href="#">27401</a>  | S-phase kinase-associated protein 2 (p45)                                                  |
| Slamf1   | -1.17  | 7.755 | -8.611 | 1.20E-08 | 3.71E-07 | 9.796 | <a href="#">27218</a>  | signaling lymphocytic activation molecule family member 1                                  |
| Slbp     | 0.8131 | 8.59  | 10.87  | 1.56E-10 | 9.93E-09 | 14.19 | <a href="#">20492</a>  | stem-loop binding protein                                                                  |
| Slc10a7  | 1.406  | 8.792 | 17.14  | 1.38E-14 | 5.72E-12 | 23.49 | <a href="#">76775</a>  | solute carrier family 10 (sodium/bile acid cotransporter family) member 7                  |
| Slc16a5  | -1.751 | 7.185 | -9.627 | 1.58E-09 | 6.79E-08 | 11.85 | <a href="#">217316</a> | solute carrier family 16 (monocarboxylic acid transporters) member 5                       |
| Slc16a7  | -1.769 | 6.728 | -8.089 | 3.58E-08 | 9.57E-07 | 8.688 | <a href="#">20503</a>  | solute carrier family 16 (monocarboxylic acid transporters) member 7                       |
| Slc25a13 | 1.686  | 7.401 | 17.07  | 1.52E-14 | 6.20E-12 | 23.4  | <a href="#">50799</a>  | solute carrier family 25 (mitochondrial carrier adenine nucleotide translocator) member 13 |
| Slc2a9   | 0.9538 | 7.927 | 9.85   | 1.03E-09 | 4.75E-08 | 12.28 | <a href="#">117591</a> | solute carrier family 2 (facilitated glucose transporter) member 9                         |
| Slc38a2  | 0.8113 | 11.03 | 8.342  | 2.09E-08 | 6.04E-07 | 9.231 | <a href="#">67760</a>  | solute carrier family 38 member 2                                                          |
| Slc39a6  | 0.8299 | 8.571 | 9.64   | 1.54E-09 | 6.67E-08 | 11.87 | <a href="#">106957</a> | solute carrier family 39 (metal ion transporter) member 6                                  |
| Slc43a3  | 1.33   | 10.05 | 8.267  | 2.45E-08 | 6.85E-07 | 9.071 | <a href="#">58207</a>  | solute carrier family 43 member 3                                                          |

|         |         |       |        |          |          |       |                        |                                                                                               |
|---------|---------|-------|--------|----------|----------|-------|------------------------|-----------------------------------------------------------------------------------------------|
| Slc46a3 | -1.313  | 8.919 | -9.583 | 1.72E-09 | 7.30E-08 | 11.76 | <a href="#">71706</a>  | solute carrier family 46 member 3                                                             |
| Slc4a7  | 1.021   | 9.117 | 8.958  | 5.90E-09 | 2.08E-07 | 10.51 | <a href="#">218756</a> | solute carrier family 4 sodium bicarbonate cotransporter member 7                             |
| Slc6a19 | 3.337   | 6.523 | 19.49  | 8.68E-16 | 8.81E-13 | 26.19 | <a href="#">74338</a>  | solute carrier family 6 (neurotransmitter transporter) member 19                              |
| Slc7a6  | 0.9426  | 9.054 | 8.684  | 1.03E-08 | 3.28E-07 | 9.948 | <a href="#">330836</a> | solute carrier family 7 (cationic amino acid transporter y+ system) member 6                  |
| Slco3a1 | -1.585  | 8.081 | -12.23 | 1.54E-11 | 1.43E-09 | 16.52 | <a href="#">108116</a> | solute carrier organic anion transporter family member 3a1                                    |
| Slco4a1 | 1.643   | 7.127 | 8.399  | 1.86E-08 | 5.44E-07 | 9.35  | <a href="#">108115</a> | solute carrier organic anion transporter family member 4a1                                    |
| Slco5a1 | -0.8535 | 6.102 | -8.111 | 3.41E-08 | 9.19E-07 | 8.736 | <a href="#">240726</a> | solute carrier organic anion transporter family member 5A1                                    |
| Smarca2 | -1.004  | 9.048 | -9.373 | 2.58E-09 | 1.03E-07 | 11.35 | <a href="#">67155</a>  | SWI/SNF related matrix associated actin dependent regulator of chromatin subfamily a member 2 |
| Smarca4 | 1.524   | 10.36 | 23.59  | 1.33E-17 | 3.94E-14 | 30.18 | <a href="#">20586</a>  | SWI/SNF related matrix associated actin dependent regulator of chromatin subfamily a member 4 |
| Smarcc1 | 0.9944  | 9.48  | 17.44  | 9.59E-15 | 4.48E-12 | 23.85 | <a href="#">20588</a>  | SWI/SNF related matrix associated actin dependent regulator of chromatin subfamily c member 1 |

|         |         |       |        |          |          |       |                        |                                                                                               |
|---------|---------|-------|--------|----------|----------|-------|------------------------|-----------------------------------------------------------------------------------------------|
| Smarce1 | 0.4856  | 9.948 | 8.442  | 1.70E-08 | 5.02E-07 | 9.442 | <a href="#">57376</a>  | SWI/SNF related matrix associated actin dependent regulator of chromatin subfamily e member 1 |
| Smc2    | 1.608   | 8.409 | 14.56  | 4.34E-13 | 7.76E-11 | 20.08 | <a href="#">14211</a>  | structural maintenance of chromosomes 2                                                       |
| Smc3    | 0.6828  | 9.486 | 8.723  | 9.51E-09 | 3.05E-07 | 10.03 | <a href="#">13006</a>  | structural maintenance of chromosomes 3                                                       |
| Smpd4   | 0.8506  | 8.315 | 8.895  | 6.70E-09 | 2.30E-07 | 10.38 | <a href="#">77626</a>  | sphingomyelin phosphodiesterase 4                                                             |
| Smpdl3a | -1.775  | 9.139 | -10.67 | 2.23E-10 | 1.33E-08 | 13.83 | <a href="#">57319</a>  | sphingomyelin phosphodiesterase acid-like 3A                                                  |
| Smtn    | 2.272   | 8.15  | 24.81  | 4.34E-18 | 1.91E-14 | 31.23 | <a href="#">29856</a>  | smoothelin                                                                                    |
| Smurf1  | -0.7573 | 8.195 | -10.27 | 4.71E-10 | 2.47E-08 | 13.07 | <a href="#">75788</a>  | SMAD specific E3 ubiquitin protein ligase 1                                                   |
| Snhg5   | 1.138   | 8.569 | 10.23  | 5.00E-10 | 2.59E-08 | 13.01 | <a href="#">72655</a>  | small nucleolar RNA host gene 5                                                               |
| Snrk    | -0.8056 | 9.608 | -10.72 | 2.06E-10 | 1.25E-08 | 13.91 | <a href="#">20623</a>  | SNF related kinase                                                                            |
| Snrpa1  | 0.7725  | 8.806 | 9.146  | 4.05E-09 | 1.51E-07 | 10.89 | <a href="#">68981</a>  | small nuclear ribonucleoprotein polypeptide A                                                 |
| Snrpf   | 0.7967  | 8.709 | 8.86   | 7.20E-09 | 2.43E-07 | 10.31 | <a href="#">69878</a>  | small nuclear ribonucleoprotein polypeptide F                                                 |
| Snx2    | 0.5814  | 10.82 | 8.054  | 3.85E-08 | 1.02E-06 | 8.614 | <a href="#">67804</a>  | sorting nexin 2                                                                               |
| Sorcs2  | 1.703   | 7.833 | 8.216  | 2.73E-08 | 7.54E-07 | 8.962 | <a href="#">81840</a>  | sortilin-related VPS10 domain containing receptor 2                                           |
| Sox4    | 2.511   | 8.439 | 25.44  | 2.49E-18 | 1.31E-14 | 31.74 | <a href="#">20677</a>  | SRY (sex determining region Y)-box 4                                                          |
| Spag5   | 2.229   | 7.405 | 14.91  | 2.64E-13 | 5.21E-11 | 20.58 | <a href="#">54141</a>  | sperm associated antigen 5                                                                    |
| Spata7  | 0.7329  | 5.486 | 9.865  | 9.98E-10 | 4.66E-08 | 12.31 | <a href="#">104871</a> | spermatogenesis associated 7                                                                  |



|          |         |       |        |          |          |       |                        |                                                                            |
|----------|---------|-------|--------|----------|----------|-------|------------------------|----------------------------------------------------------------------------|
| Spc24    | 0.9493  | 7.095 | 8.907  | 6.53E-09 | 2.25E-07 | 10.41 | <a href="#">67629</a>  | SPC24 NDC80 kinetochore complex component homolog ( <i>S. cerevisiae</i> ) |
| Spc25    | 1.738   | 7.258 | 12.74  | 6.71E-12 | 7.12E-10 | 17.35 | <a href="#">66442</a>  | SPC25 NDC80 kinetochore complex component homolog ( <i>S. cerevisiae</i> ) |
| Spef2    | 1.57    | 5.601 | 11.41  | 6.05E-11 | 4.43E-09 | 15.14 | <a href="#">320277</a> | sperm flagellar 2                                                          |
| Spint2   | -1.228  | 8.276 | -8.481 | 1.57E-08 | 4.69E-07 | 9.523 | <a href="#">20733</a>  | serine protease inhibitor Kunitz type 2                                    |
| Spp1     | 2.115   | 6.596 | 9.043  | 4.97E-09 | 1.81E-07 | 10.69 | <a href="#">20750</a>  | secreted phosphoprotein 1                                                  |
| Spred1   | 2.052   | 8.379 | 13.69  | 1.56E-12 | 2.13E-10 | 18.81 | <a href="#">114715</a> | sprouty protein with EVH-1 domain 1 related sequence                       |
| Spred2   | 1.496   | 8.456 | 16.84  | 2.01E-14 | 7.45E-12 | 23.13 | <a href="#">114716</a> | sprouty-related EVH1 domain containing 2                                   |
| Sqle     | 1.294   | 8.037 | 10.47  | 3.23E-10 | 1.79E-08 | 13.45 | <a href="#">20775</a>  | squalene epoxidase                                                         |
| Sqrdl    | -1.451  | 7.101 | -8.564 | 1.32E-08 | 4.02E-07 | 9.699 | <a href="#">59010</a>  | sulfide quinone reductase-like (yeast)                                     |
| Srbd1    | 0.5384  | 8.355 | 9.282  | 3.09E-09 | 1.20E-07 | 11.17 | <a href="#">78586</a>  | S1 RNA binding domain 1                                                    |
| Srd5a1   | 0.7492  | 6.281 | 8.745  | 9.10E-09 | 2.93E-07 | 10.07 | <a href="#">78925</a>  | steroid 5 alpha-reductase 1                                                |
| Srd5a3   | -0.8104 | 9.33  | -7.978 | 4.53E-08 | 1.17E-06 | 8.449 | <a href="#">57357</a>  | steroid 5 alpha-reductase 3                                                |
| St3gal6  | 1.882   | 9.709 | 9.984  | 7.97E-10 | 3.86E-08 | 12.54 | <a href="#">54613</a>  | ST3 beta-galactoside alpha-2 3-sialyltransferase 6                         |
| St8sia1  | -2.132  | 7.312 | -12.63 | 8.09E-12 | 8.39E-10 | 17.16 | <a href="#">20449</a>  | ST8 alpha-N-acetyl-neuraminide alpha-2 8-sialyltransferase 1               |
| St8sia6  | -2.227  | 8.071 | -11.65 | 4.06E-11 | 3.18E-09 | 15.54 | <a href="#">241230</a> | ST8 alpha-N-acetyl-neuraminide alpha-2 8-sialyltransferase 6               |
| Stambpl1 | 1.512   | 9.702 | 12.07  | 1.99E-11 | 1.77E-09 | 16.26 | <a href="#">76630</a>  | STAM binding protein like 1                                                |
| Stard5   | -1.031  | 9.139 | -12.02 | 2.17E-11 | 1.89E-09 | 16.17 | <a href="#">170460</a> | StAR-related lipid transfer (START) domain containing 5                    |

|         |         |       |        |          |          |       |                        |                                                                               |
|---------|---------|-------|--------|----------|----------|-------|------------------------|-------------------------------------------------------------------------------|
| Stc2    | -1.028  | 7.477 | -11    | 1.24E-10 | 8.11E-09 | 14.42 | <a href="#">20856</a>  | stanniocalcin 2                                                               |
| Steap3  | 1.062   | 7.505 | 11.54  | 4.89E-11 | 3.72E-09 | 15.35 | <a href="#">68428</a>  | STEAP family member 3                                                         |
| Stil    | 2.256   | 7.106 | 16.19  | 4.65E-14 | 1.37E-11 | 22.3  | <a href="#">20460</a>  | Scl/Tal1 interrupting locus                                                   |
| Stk3    | 1.32    | 8.625 | 10.27  | 4.63E-10 | 2.44E-08 | 13.09 | <a href="#">56274</a>  | serine/threonine kinase 3                                                     |
| Stk39   | -1.794  | 7.146 | -13.09 | 3.88E-12 | 4.54E-10 | 17.9  | <a href="#">53416</a>  | serine/threonine kinase 39                                                    |
| Stmn1   | 2.02    | 9.917 | 14.98  | 2.39E-13 | 4.90E-11 | 20.68 | <a href="#">16765</a>  | stathmin 1                                                                    |
| Ston1   | 1.466   | 6.649 | 14.43  | 5.25E-13 | 8.80E-11 | 19.9  | <a href="#">77057</a>  | stonin 1                                                                      |
| Stx11   | -0.7376 | 8.401 | -9.258 | 3.24E-09 | 1.26E-07 | 11.12 | <a href="#">74732</a>  | syntaxin 11                                                                   |
| Stxbp1  | 1.489   | 8.316 | 8.791  | 8.27E-09 | 2.71E-07 | 10.17 | <a href="#">20910</a>  | syntaxin binding protein 1                                                    |
| Susd1   | 1.768   | 9.016 | 12.67  | 7.59E-12 | 7.93E-10 | 17.23 | <a href="#">634731</a> | sushi domain containing 1                                                     |
| Suv39h1 | 0.9685  | 8.511 | 10.26  | 4.75E-10 | 2.49E-08 | 13.06 | <a href="#">20937</a>  | suppressor of variegation 3-9<br>homolog 1 (Drosophila)                       |
| Swap70  | -1.867  | 9.35  | -15.03 | 2.22E-13 | 4.60E-11 | 20.75 | <a href="#">20947</a>  | SWA-70 protein                                                                |
| Syce2   | 1.008   | 7.7   | 12.08  | 1.98E-11 | 1.77E-09 | 16.26 | <a href="#">71846</a>  | synaptonemal complex central<br>element protein 2                             |
| Synpo2  | -0.9785 | 6.475 | -9.385 | 2.52E-09 | 1.01E-07 | 11.37 | <a href="#">118449</a> | synaptopodin 2                                                                |
| Sytl2   | -1.232  | 6.508 | -7.96  | 4.71E-08 | 1.21E-06 | 8.409 | <a href="#">83671</a>  | synaptotagmin-like 2                                                          |
| Tacc3   | 1.571   | 7.493 | 14.16  | 7.71E-13 | 1.19E-10 | 19.51 | <a href="#">21335</a>  | transforming acidic coiled-coil<br>containing protein 3                       |
| Tada2a  | 0.7931  | 7.617 | 9.147  | 4.04E-09 | 1.51E-07 | 10.9  | <a href="#">217031</a> | transcriptional adaptor 2A                                                    |
| Taf1d   | 1.19    | 10.41 | 13.55  | 1.91E-12 | 2.53E-10 | 18.61 | <a href="#">75316</a>  | TATA box binding protein (Tbp)-<br>associated factor RNA polymerase I D       |
| Taf9    | 0.7667  | 8.762 | 12.13  | 1.80E-11 | 1.62E-09 | 16.36 | <a href="#">108143</a> | TAF9 RNA polymerase II TATA box<br>binding protein (TBP)-associated<br>factor |
| Tanc2   | -0.677  | 6.201 | -11.65 | 4.07E-11 | 3.19E-09 | 15.54 | <a href="#">77097</a>  | tetratricopeptide repeat ankyrin<br>repeat and coiled-coil containing 2       |

|         |         |       |        |          |          |       |                        |                                                       |
|---------|---------|-------|--------|----------|----------|-------|------------------------|-------------------------------------------------------|
| Tank    | -0.9954 | 9.516 | -9.487 | 2.07E-09 | 8.53E-08 | 11.57 | <a href="#">21353</a>  | TRAF family member-associated Nf-kappa B activator    |
| Tapbp1  | -0.9919 | 8.084 | -8.479 | 1.57E-08 | 4.70E-07 | 9.52  | <a href="#">213233</a> | TAP binding protein-like                              |
| Taptp1  | 1.019   | 9.675 | 9.426  | 2.33E-09 | 9.46E-08 | 11.45 | <a href="#">231225</a> | transmembrane anterior posterior transformation 1     |
| Tbc1d2b | -1.791  | 8.601 | -11.81 | 3.08E-11 | 2.57E-09 | 15.82 | <a href="#">67016</a>  | TBC1 domain family member 2B                          |
| Tbc1d31 | 1.221   | 7.975 | 10.44  | 3.44E-10 | 1.89E-08 | 13.39 | <a href="#">210544</a> | TBC1 domain family member 31                          |
| Tbc1d8  | -1.168  | 7.799 | -9.155 | 3.98E-09 | 1.50E-07 | 10.91 | <a href="#">54610</a>  | TBC1 domain family member 8                           |
| Tbx21   | -1.259  | 7.553 | -11.47 | 5.46E-11 | 4.09E-09 | 15.24 | <a href="#">57765</a>  | T-box 21                                              |
| Tcf3    | 0.8216  | 10.01 | 12.83  | 5.89E-12 | 6.42E-10 | 17.48 | <a href="#">21423</a>  | transcription factor 3                                |
| Tcf4    | 0.9224  | 9.862 | 9.496  | 2.03E-09 | 8.40E-08 | 11.59 | <a href="#">21413</a>  | transcription factor 4                                |
| Tcf7    | -2.418  | 8.995 | -11.88 | 2.72E-11 | 2.29E-09 | 15.94 | <a href="#">21414</a>  | transcription factor 7 T cell specific                |
| Tcf7l2  | 1.418   | 7.964 | 8.569  | 1.30E-08 | 3.99E-07 | 9.709 | <a href="#">21416</a>  | transcription factor 7 like 2 T cell specific HMG box |
| Tcrg-C4 | -1.656  | 6.098 | -9.758 | 1.23E-09 | 5.53E-08 | 12.1  | ---                    | T cell receptor gamma constant 4                      |
| Tdg     | 1.278   | 9.041 | 13.52  | 2.00E-12 | 2.63E-10 | 18.56 | <a href="#">21665</a>  | thymine DNA glycosylase                               |
| Tdrkh   | -0.9955 | 5.581 | -11.75 | 3.39E-11 | 2.77E-09 | 15.72 | <a href="#">72634</a>  | tudor and KH domain containing protein                |
| Tdrp    | -1.721  | 7.739 | -11.77 | 3.32E-11 | 2.74E-09 | 15.74 | <a href="#">72148</a>  | testis development related protein                    |
| Terc    | 0.943   | 10.02 | 9.016  | 5.25E-09 | 1.90E-07 | 10.63 | <a href="#">21748</a>  | telomerase RNA component                              |
| Tex30   | 1.292   | 7.603 | 9.417  | 2.37E-09 | 9.59E-08 | 11.44 | <a href="#">75623</a>  | testis expressed 30                                   |
| Tfdp1   | 1.462   | 9.761 | 12.45  | 1.07E-11 | 1.06E-09 | 16.88 | <a href="#">21781</a>  | transcription factor Dp 1                             |
| Tfpi    | -1.81   | 7.259 | -10.89 | 1.52E-10 | 9.76E-09 | 14.21 | <a href="#">21788</a>  | tissue factor pathway inhibitor                       |
| Tfrc    | 2.052   | 8.764 | 13.24  | 3.07E-12 | 3.76E-10 | 18.13 | <a href="#">22042</a>  | transferrin receptor                                  |
| Tgfbr3  | -1.419  | 8.273 | -12.06 | 2.03E-11 | 1.79E-09 | 16.24 | <a href="#">21814</a>  | transforming growth factor beta receptor III          |

|          |         |       |        |          |          |       |                        |                                                          |
|----------|---------|-------|--------|----------|----------|-------|------------------------|----------------------------------------------------------|
| Tgoln1   | -0.621  | 9.975 | -8.381 | 1.93E-08 | 5.63E-07 | 9.312 | <a href="#">22134</a>  | trans-golgi network protein                              |
| Themis   | -2.834  | 7.462 | -16.56 | 2.91E-14 | 9.66E-12 | 22.76 | <a href="#">210757</a> | thymocyte selection associated                           |
| Thoc6    | 0.8708  | 8.633 | 13.23  | 3.15E-12 | 3.82E-10 | 18.11 | <a href="#">386612</a> | THO complex 6 homolog (Drosophila)                       |
| Thop1    | 0.6673  | 7.281 | 9.783  | 1.17E-09 | 5.31E-08 | 12.15 | <a href="#">50492</a>  | thimet oligopeptidase 1                                  |
| Thy1     | -2.389  | 8.458 | -12.68 | 7.41E-12 | 7.78E-10 | 17.25 | <a href="#">21838</a>  | thymus cell antigen 1 theta                              |
| Tia1     | 0.9695  | 8.906 | 12.16  | 1.73E-11 | 1.58E-09 | 16.4  | <a href="#">21841</a>  | cytotoxic granule-associated RNA binding protein 1       |
| Ticrr    | 2.285   | 7.606 | 19.39  | 9.71E-16 | 8.82E-13 | 26.08 | <a href="#">77011</a>  | TOPBP1-interacting checkpoint and replication regulator  |
| Tifa     | 1.558   | 8.095 | 9.727  | 1.30E-09 | 5.81E-08 | 12.04 | <a href="#">211550</a> | TRAF-interacting protein with forkhead-associated domain |
| Timm8a1  | 0.93    | 7.547 | 8.591  | 1.25E-08 | 3.84E-07 | 9.754 | <a href="#">30058</a>  | translocase of inner mitochondrial membrane 8A1          |
| Timp2    | -2.131  | 8.425 | -13.58 | 1.84E-12 | 2.45E-10 | 18.65 | <a href="#">21858</a>  | tissue inhibitor of metalloproteinase 2                  |
| Tipin    | 1.151   | 8.533 | 17.42  | 9.84E-15 | 4.48E-12 | 23.83 | <a href="#">66131</a>  | timeless interacting protein                             |
| Tk2      | -0.6495 | 8.861 | -8.422 | 1.77E-08 | 5.22E-07 | 9.4   | <a href="#">57813</a>  | thymidine kinase 2 mitochondrial                         |
| Tln2     | -0.618  | 6.251 | -8.054 | 3.85E-08 | 1.02E-06 | 8.613 | <a href="#">70549</a>  | talin 2                                                  |
| Tlr1     | -2.193  | 8.978 | -11.6  | 4.37E-11 | 3.38E-09 | 15.47 | <a href="#">21897</a>  | toll-like receptor 1                                     |
| Tlr12    | -0.5359 | 6.28  | -9.2   | 3.64E-09 | 1.39E-07 | 11    | <a href="#">384059</a> | toll-like receptor 12                                    |
| Tmcc3    | -0.8913 | 6.917 | -9.627 | 1.57E-09 | 6.79E-08 | 11.85 | <a href="#">319880</a> | transmembrane and coiled coil domains 3                  |
| Tmem138  | 0.7776  | 7.256 | 8.415  | 1.80E-08 | 5.28E-07 | 9.385 | <a href="#">72982</a>  | transmembrane protein 138                                |
| Tmem176b | -1.518  | 8.784 | -8.193 | 2.86E-08 | 7.85E-07 | 8.913 | <a href="#">65963</a>  | transmembrane protein 176B                               |
| Tmem231  | -0.8961 | 7.054 | -12.41 | 1.14E-11 | 1.11E-09 | 16.82 | <a href="#">234740</a> | transmembrane protein 231                                |
| Tmem255a | 3.706   | 7.047 | 31.27  | 2.46E-20 | 3.55E-16 | 35.91 | <a href="#">245386</a> | transmembrane protein 255A                               |
| Tmem39b  | 0.6246  | 8.232 | 8.256  | 2.51E-08 | 6.99E-07 | 9.047 | <a href="#">230770</a> | transmembrane protein 39b                                |

|          |         |       |        |          |          |       |                        |                                                              |
|----------|---------|-------|--------|----------|----------|-------|------------------------|--------------------------------------------------------------|
| Tmem98   | 1.231   | 7.25  | 9.534  | 1.89E-09 | 7.90E-08 | 11.67 | <a href="#">103743</a> | transmembrane protein 98                                     |
| Tmpo     | 0.7701  | 9.927 | 8.822  | 7.77E-09 | 2.58E-07 | 10.23 | <a href="#">21917</a>  | thymopoietin                                                 |
| Tnfrsf19 | 2.564   | 7.624 | 11.35  | 6.78E-11 | 4.88E-09 | 15.02 | <a href="#">29820</a>  | tumor necrosis factor receptor superfamily member 19         |
| Tnfrsf1a | -1.588  | 8.024 | -9.895 | 9.43E-10 | 4.46E-08 | 12.37 | <a href="#">21937</a>  | tumor necrosis factor receptor superfamily member 1a         |
| Tnfrsf25 | -1.202  | 7.548 | -9.852 | 1.02E-09 | 4.75E-08 | 12.28 | <a href="#">85030</a>  | tumor necrosis factor receptor superfamily member 25         |
| Tnfsf8   | -1.578  | 6.557 | -9.938 | 8.69E-10 | 4.18E-08 | 12.45 | <a href="#">21949</a>  | tumor necrosis factor (ligand) superfamily member 8          |
| Tnik     | -2.1    | 7.906 | -13.96 | 1.04E-12 | 1.53E-10 | 19.21 | <a href="#">665113</a> | TRAF2 and NCK interacting kinase                             |
| Tnip1    | -0.9124 | 8.356 | -9.638 | 1.54E-09 | 6.69E-08 | 11.87 | <a href="#">57783</a>  | TNFAIP3 interacting protein 1                                |
| Tob1     | -0.6316 | 9.741 | -8.922 | 6.34E-09 | 2.20E-07 | 10.44 | <a href="#">22057</a>  | transducer of ErbB-2.1                                       |
| Top2a    | 2.493   | 9.039 | 14.07  | 8.84E-13 | 1.33E-10 | 19.38 | <a href="#">21973</a>  | topoisomerase (DNA) II alpha                                 |
| Topbp1   | 0.9066  | 9.487 | 15.49  | 1.19E-13 | 2.75E-11 | 21.37 | <a href="#">235559</a> | topoisomerase (DNA) II binding protein 1                     |
| Tor4a    | -0.9601 | 8.474 | -8.946 | 6.04E-09 | 2.11E-07 | 10.49 | <a href="#">227612</a> | torsin family 4 member A                                     |
| Tox      | -1.497  | 7.974 | -8.334 | 2.13E-08 | 6.09E-07 | 9.213 | <a href="#">252838</a> | thymocyte selection-associated high mobility group box       |
| Tpx2     | 2.128   | 7.932 | 15.65  | 9.62E-14 | 2.34E-11 | 21.58 | <a href="#">72119</a>  | TPX2 microtubule-associated protein homolog (Xenopus laevis) |
| Traf1    | -1.961  | 8.177 | -12.44 | 1.09E-11 | 1.07E-09 | 16.86 | <a href="#">22029</a>  | TNF receptor-associated factor 1                             |
| Traf5    | -1.084  | 9.03  | -8.842 | 7.46E-09 | 2.50E-07 | 10.27 | <a href="#">22033</a>  | TNF receptor-associated factor 5                             |
| Traip    | 0.8762  | 6.701 | 11.65  | 4.02E-11 | 3.16E-09 | 15.55 | <a href="#">22036</a>  | TRAF-interacting protein                                     |
| Traj41   | -2.268  | 7.713 | -12.36 | 1.25E-11 | 1.20E-09 | 16.73 | <a href="#">---</a>    | T cell receptor alpha joining 41                             |

|                |         |       |        |          |          |       |                        |                                                    |
|----------------|---------|-------|--------|----------|----------|-------|------------------------|----------------------------------------------------|
| Traj44         | -1.752  | 8.557 | -11.31 | 7.21E-11 | 5.14E-09 | 14.96 | <a href="#">---</a>    | T cell receptor alpha joining 44                   |
| Traj49         | -3.477  | 5.976 | -14.55 | 4.42E-13 | 7.86E-11 | 20.07 | <a href="#">---</a>    | T cell receptor alpha joining 49                   |
| Traj57         | -1.803  | 8.59  | -9.917 | 9.04E-10 | 4.32E-08 | 12.41 | <a href="#">---</a>    | T cell receptor alpha joining 57                   |
| Trat1          | -3.019  | 6.411 | -14.93 | 2.59E-13 | 5.17E-11 | 20.6  | <a href="#">77647</a>  | T cell receptor associated transmembrane adaptor 1 |
| Trav10         | -2.33   | 5.938 | -10.68 | 2.23E-10 | 1.33E-08 | 13.83 | <a href="#">---</a>    | T cell receptor alpha variable 10                  |
| Trav12d-2      | -1.514  | 8.334 | -8.523 | 1.44E-08 | 4.33E-07 | 9.612 | <a href="#">---</a>    | T cell receptor alpha variable 12D-2               |
| Trav13n-4      | -0.878  | 8.592 | -8.613 | 1.19E-08 | 3.69E-07 | 9.801 | <a href="#">---</a>    | T cell receptor alpha variable 13N-4               |
| Trav14-1       | -1.97   | 5.992 | -9.252 | 3.28E-09 | 1.27E-07 | 11.11 | <a href="#">---</a>    | T cell receptor alpha variable 14-1                |
| Trav14d-2      | -2.048  | 6.478 | -8.754 | 8.93E-09 | 2.89E-07 | 10.09 | <a href="#">---</a>    | T cell receptor alpha variable 14D-2               |
| Trav15-1-dv6-1 | -1.806  | 4.22  | -12.96 | 4.73E-12 | 5.32E-10 | 17.7  | <a href="#">---</a>    | T cell receptor alpha variable 15-1-DV6-1          |
| Trav15n-1      | -0.9398 | 7.299 | -8.015 | 4.19E-08 | 1.10E-06 | 8.528 | <a href="#">---</a>    | T cell receptor alpha variable 15N-1               |
| Trav16d-dv11   | -1.361  | 6.643 | -11.95 | 2.44E-11 | 2.08E-09 | 16.05 | <a href="#">---</a>    | T cell receptor alpha variable 16D-DV11            |
| Trav19         | -0.9062 | 6.99  | -8.172 | 3.00E-08 | 8.17E-07 | 8.867 | <a href="#">547428</a> | T cell receptor alpha variable 19                  |
| Trav21-dv12    | -1.879  | 6.86  | -9.089 | 4.54E-09 | 1.68E-07 | 10.78 | <a href="#">---</a>    | T cell receptor alpha variable 21-DV12             |
| Trav5-4        | -1.762  | 5.738 | -8.225 | 2.68E-08 | 7.42E-07 | 8.981 | <a href="#">21507</a>  | T cell receptor alpha variable 5-4                 |
| Trav6d-4       | -1.821  | 6.016 | -8.365 | 2.00E-08 | 5.79E-07 | 9.278 | <a href="#">---</a>    | T cell receptor alpha variable 6D-4                |
| Trav6n-5       | -1.419  | 6.101 | -8.383 | 1.92E-08 | 5.60E-07 | 9.317 | <a href="#">---</a>    | T cell receptor alpha variable 6N-5                |

|          |         |       |        |          |          |       |                        |                                                        |
|----------|---------|-------|--------|----------|----------|-------|------------------------|--------------------------------------------------------|
| Trav6n-6 | -1.805  | 8.395 | -10.54 | 2.82E-10 | 1.60E-08 | 13.59 | ---                    | T cell receptor alpha variable 6N-6                    |
| Trav7-3  | -2.094  | 7.268 | -9.177 | 3.81E-09 | 1.44E-07 | 10.96 | ---                    | T cell receptor alpha variable 7-3                     |
| Trav7-4  | -2.307  | 7.494 | -12.05 | 2.07E-11 | 1.82E-09 | 16.22 | <a href="#">386450</a> | T cell receptor alpha variable 7-4                     |
| Trav8d-1 | -1.548  | 8.995 | -8.101 | 3.49E-08 | 9.36E-07 | 8.714 | <a href="#">667476</a> | T cell receptor alpha variable 8D-1                    |
| Trav8n-2 | -2.251  | 5.229 | -8.199 | 2.83E-08 | 7.76E-07 | 8.926 | ---                    | T cell receptor alpha variable 8n-2                    |
| Trav9-1  | -2.157  | 8.578 | -9.873 | 9.83E-10 | 4.61E-08 | 12.33 | ---                    | T cell receptor alpha variable 9-1                     |
| Trav9n-4 | -1.475  | 8.786 | -8.459 | 1.64E-08 | 4.87E-07 | 9.478 | ---                    | T cell receptor alpha variable 9N-4                    |
| Trbv1    | -2.459  | 8.98  | -10.79 | 1.81E-10 | 1.13E-08 | 14.03 | <a href="#">621968</a> | T cell receptor beta variable 1                        |
| Trbv29   | -2.73   | 7.014 | -9.166 | 3.89E-09 | 1.47E-07 | 10.93 | ---                    | T cell receptor beta variable 29                       |
| Trerf1   | -0.8955 | 7.187 | -11.95 | 2.44E-11 | 2.08E-09 | 16.05 | <a href="#">224829</a> | transcriptional regulating factor 1                    |
| Trim16   | 0.7057  | 7.299 | 8.278  | 2.40E-08 | 6.71E-07 | 9.093 | <a href="#">94092</a>  | tripartite motif-containing 16                         |
| Trim28   | 0.7683  | 9.76  | 10.25  | 4.87E-10 | 2.53E-08 | 13.04 | <a href="#">21849</a>  | tripartite motif-containing 28                         |
| Trim37   | 0.8412  | 8.43  | 9.739  | 1.27E-09 | 5.69E-08 | 12.07 | <a href="#">68729</a>  | tripartite motif-containing 37                         |
| Trim7    | -2.175  | 7.672 | -13.72 | 1.49E-12 | 2.07E-10 | 18.85 | <a href="#">94089</a>  | tripartite motif-containing 7                          |
| Trip13   | 1.778   | 6.947 | 16.86  | 1.98E-14 | 7.45E-12 | 23.14 | <a href="#">69716</a>  | thyroid hormone receptor interactor 13                 |
| Troap    | 1.625   | 7.602 | 15.86  | 7.22E-14 | 1.92E-11 | 21.86 | <a href="#">78733</a>  | trophinin associated protein                           |
| Trp53i11 | 0.835   | 11.48 | 8.729  | 9.40E-09 | 3.03E-07 | 10.04 | <a href="#">277414</a> | transformation related protein 53 inducible protein 11 |
| Trp53i13 | 1.172   | 7.829 | 9.02   | 5.21E-09 | 1.88E-07 | 10.64 | <a href="#">216964</a> | transformation related protein 53 inducible protein 13 |

|         |         |       |        |          |          |       |                        |                                                    |
|---------|---------|-------|--------|----------|----------|-------|------------------------|----------------------------------------------------|
| Trpt1   | -0.5751 | 7.142 | -10.83 | 1.68E-10 | 1.06E-08 | 14.11 | <a href="#">107328</a> | tRNA phosphotransferase 1                          |
| Tshz3   | -0.8003 | 7.039 | -12.39 | 1.19E-11 | 1.15E-09 | 16.77 | <a href="#">243931</a> | teashirt zinc finger family member 3               |
| Tspan9  | -0.6889 | 7.034 | -8.471 | 1.60E-08 | 4.77E-07 | 9.502 | <a href="#">109246</a> | tetraspanin 9                                      |
| Ttc26   | 0.9945  | 5.757 | 8.144  | 3.18E-08 | 8.59E-07 | 8.806 | <a href="#">264134</a> | tetratricopeptide repeat domain 26                 |
| Ttf2    | 0.7704  | 7.157 | 10.39  | 3.73E-10 | 2.02E-08 | 13.31 | <a href="#">74044</a>  | transcription termination factor RNA polymerase II |
| Ttk     | 2.349   | 6.824 | 19.59  | 7.77E-16 | 8.13E-13 | 26.3  | <a href="#">22137</a>  | Ttk protein kinase                                 |
| Ttll12  | 1.172   | 8.827 | 12.54  | 9.29E-12 | 9.41E-10 | 17.02 | <a href="#">223723</a> | tubulin tyrosine ligase-like family member 12      |
| Tuba1b  | 0.7225  | 12.27 | 9.305  | 2.95E-09 | 1.16E-07 | 11.21 | <a href="#">22143</a>  | tubulin alpha 1B                                   |
| Tuba1c  | 0.8043  | 12.38 | 9.642  | 1.53E-09 | 6.65E-08 | 11.88 | <a href="#">22146</a>  | tubulin alpha 1C                                   |
| Tubb4b  | 0.6593  | 10.16 | 8.04   | 3.97E-08 | 1.05E-06 | 8.582 | <a href="#">227613</a> | tubulin beta 4B class IVB                          |
| Tube1   | 0.965   | 6.811 | 8.485  | 1.55E-08 | 4.66E-07 | 9.533 | <a href="#">71924</a>  | epsilon-tubulin 1                                  |
| Txk     | -2.435  | 7.859 | -14.41 | 5.41E-13 | 9.03E-11 | 19.87 | <a href="#">22165</a>  | TXK tyrosine kinase                                |
| Tyms    | 1.988   | 8.35  | 15.2   | 1.76E-13 | 3.75E-11 | 20.98 | <a href="#">22171</a>  | thymidylate synthase                               |
| Tyms-ps | 0.7342  | 6.369 | 8.751  | 8.99E-09 | 2.91E-07 | 10.09 | <a href="#">22172</a>  | thymidylate synthase pseudogene                    |
| Uba2    | 0.6257  | 9.677 | 11.75  | 3.40E-11 | 2.77E-09 | 15.72 | <a href="#">50995</a>  | ubiquitin-like modifier activating enzyme 2        |
| Ube2c   | 1.538   | 8.275 | 9.501  | 2.01E-09 | 8.33E-08 | 11.6  | <a href="#">68612</a>  | ubiquitin-conjugating enzyme E2C                   |
| Ube2e2  | -1.444  | 6.903 | -9.232 | 3.41E-09 | 1.32E-07 | 11.07 | <a href="#">218793</a> | ubiquitin-conjugating enzyme E2E 2                 |
| Ube2s   | 0.9883  | 9.577 | 13.59  | 1.80E-12 | 2.41E-10 | 18.66 | <a href="#">77891</a>  | ubiquitin-conjugating enzyme E2S                   |
| Uchl1   | 2.318   | 6.802 | 9.395  | 2.48E-09 | 9.97E-08 | 11.39 | <a href="#">22223</a>  | ubiquitin carboxy-terminal hydrolase L1            |



|        |         |       |        |          |          |       |                        |                                                          |
|--------|---------|-------|--------|----------|----------|-------|------------------------|----------------------------------------------------------|
| Uchl5  | 0.8728  | 8.747 | 9.115  | 4.30E-09 | 1.60E-07 | 10.83 | <a href="#">56207</a>  | ubiquitin carboxyl-terminal esterase L5                  |
| Uhrf1  | 2.112   | 8.455 | 13.51  | 2.05E-12 | 2.69E-10 | 18.54 | <a href="#">18140</a>  | ubiquitin-like containing PHD and RING finger domains 1  |
| Umps   | 0.8779  | 8.691 | 11.48  | 5.42E-11 | 4.07E-09 | 15.25 | <a href="#">22247</a>  | uridine monophosphate synthetase                         |
| Upf3b  | 0.5967  | 7.425 | 8.205  | 2.80E-08 | 7.69E-07 | 8.938 | <a href="#">68134</a>  | UPF3 regulator of nonsense transcripts homolog B (yeast) |
| Urgcp  | -0.4102 | 8.032 | -8.594 | 1.24E-08 | 3.82E-07 | 9.761 | <a href="#">72046</a>  | upregulator of cell proliferation                        |
| Usp44  | 1.339   | 5.522 | 8.866  | 7.11E-09 | 2.41E-07 | 10.32 | <a href="#">327799</a> | ubiquitin specific peptidase 44                          |
| Usp53  | -0.9051 | 7.555 | -12.19 | 1.65E-11 | 1.52E-09 | 16.45 | <a href="#">99526</a>  | ubiquitin specific peptidase 53                          |
| Usp54  | 0.9033  | 7.146 | 12.17  | 1.69E-11 | 1.54E-09 | 16.42 | <a href="#">78787</a>  | ubiquitin specific peptidase 54                          |
| Vangl2 | 0.7257  | 7.117 | 10.31  | 4.37E-10 | 2.32E-08 | 13.15 | <a href="#">93840</a>  | vang-like 2 (van gogh Drosophila)                        |
| Vpreb1 | 3.037   | 7.953 | 16.15  | 4.94E-14 | 1.42E-11 | 22.24 | <a href="#">22362</a>  | pre-B lymphocyte gene 1                                  |
| Vpreb2 | 1.656   | 8.859 | 11.41  | 6.14E-11 | 4.48E-09 | 15.12 | <a href="#">22363</a>  | pre-B lymphocyte gene 2                                  |
| Vpreb3 | 3.105   | 10.05 | 31     | 3.00E-20 | 3.55E-16 | 35.73 | <a href="#">22364</a>  | pre-B lymphocyte gene 3                                  |
| Wdhd1  | 1.526   | 8.139 | 11.44  | 5.76E-11 | 4.27E-09 | 15.19 | <a href="#">218973</a> | WD repeat and HMG-box DNA binding protein 1              |
| Wdr5   | 0.5383  | 8.545 | 8.243  | 2.58E-08 | 7.18E-07 | 9.019 | <a href="#">140858</a> | WD repeat domain 5                                       |
| Wdr62  | 0.912   | 7.329 | 11.25  | 8.02E-11 | 5.64E-09 | 14.86 | <a href="#">233064</a> | WD repeat domain 62                                      |
| Wdr76  | 0.725   | 8.165 | 7.959  | 4.72E-08 | 1.21E-06 | 8.407 | <a href="#">241627</a> | WD repeat domain 76                                      |
| Wee1   | 1.514   | 7.972 | 16.3   | 4.05E-14 | 1.27E-11 | 22.43 | <a href="#">22390</a>  | WEE 1 homolog 1 (S. pombe)                               |
| Whsc1  | 1.628   | 8.396 | 18.38  | 3.10E-15 | 1.97E-12 | 24.96 | <a href="#">107823</a> | Wolf-Hirschhorn syndrome candidate 1 (human)             |
| Xcl1   | -1.077  | 7.318 | -11.04 | 1.17E-10 | 7.72E-09 | 14.48 | <a href="#">16963</a>  | chemokine (C motif) ligand 1                             |
| Xkr5   | 0.8784  | 6.33  | 9.703  | 1.36E-09 | 6.01E-08 | 12    | <a href="#">319581</a> | X Kell blood group precursor-related family member 5     |

|          |         |       |        |          |          |       |                        |                                                                                            |
|----------|---------|-------|--------|----------|----------|-------|------------------------|--------------------------------------------------------------------------------------------|
| Xkrx     | -1.98   | 6.506 | -13.79 | 1.33E-12 | 1.90E-10 | 18.97 | <a href="#">331524</a> | X Kell blood group precursor related X linked                                              |
| Xrcc6    | 1.225   | 7.468 | 11.26  | 7.85E-11 | 5.56E-09 | 14.88 | <a href="#">14375</a>  | X-ray repair complementing defective repair in Chinese hamster cells 6                     |
| Ywhae    | 0.5978  | 10.59 | 8.925  | 6.30E-09 | 2.19E-07 | 10.45 | <a href="#">22627</a>  | tyrosine 3-monooxygenase/tryptophan 5-monooxygenase activation protein epsilon polypeptide |
| Zak      | 1.317   | 7.288 | 9.492  | 2.05E-09 | 8.47E-08 | 11.58 | <a href="#">65964</a>  | sterile alpha motif and leucine zipper containing kinase AZK                               |
| Zap70    | -2.052  | 7.844 | -10.97 | 1.31E-10 | 8.57E-09 | 14.36 | <a href="#">22637</a>  | zeta-chain (TCR) associated protein kinase                                                 |
| Zbtb20   | -1.378  | 8.953 | -8.912 | 6.47E-09 | 2.24E-07 | 10.42 | <a href="#">---</a>    | zinc finger and BTB domain containing 20                                                   |
| Zbtb4    | -0.9957 | 7.971 | -12.59 | 8.63E-12 | 8.84E-10 | 17.1  | <a href="#">75580</a>  | zinc finger and BTB domain containing 4                                                    |
| Zbtbd6   | 1.269   | 6.558 | 11.93  | 2.53E-11 | 2.14E-09 | 16.02 | <a href="#">432879</a> | kelch repeat and BTB (POZ) domain containing 6                                             |
| Zc3h12c  | -1.696  | 7.595 | -9.716 | 1.33E-09 | 5.88E-08 | 12.02 | <a href="#">244871</a> | zinc finger CCCH type containing 12C                                                       |
| Zc3hav1l | 1.083   | 7.092 | 10.22  | 5.15E-10 | 2.64E-08 | 12.98 | <a href="#">209032</a> | zinc finger CCCH-type antiviral 1-like                                                     |
| Zcchc2   | 0.7672  | 8.833 | 12.72  | 6.95E-12 | 7.35E-10 | 17.31 | <a href="#">227449</a> | zinc finger CCHC domain containing 2                                                       |
| Zdhhc23  | -0.9232 | 7.884 | -10.22 | 5.08E-10 | 2.62E-08 | 12.99 | <a href="#">332175</a> | zinc finger DHHC domain containing 23                                                      |
| Zfand4   | 0.8454  | 5.835 | 8.001  | 4.31E-08 | 1.13E-06 | 8.498 | <a href="#">67492</a>  | zinc finger AN1-type domain 4                                                              |
| Zfp109   | -0.6979 | 7.243 | -9.3   | 2.98E-09 | 1.17E-07 | 11.2  | <a href="#">56869</a>  | zinc finger protein 109                                                                    |

|          |         |       |        |          |          |       |                           |                                                                      |
|----------|---------|-------|--------|----------|----------|-------|---------------------------|----------------------------------------------------------------------|
| Zfp282   | 0.5208  | 7.817 | 8.336  | 2.12E-08 | 6.09E-07 | 9.218 | <a href="#">101095</a>    | zinc finger protein 282                                              |
| Zfp366   | -0.8826 | 7.939 | -11.91 | 2.59E-11 | 2.19E-09 | 15.99 | <a href="#">238803</a>    | zinc finger protein 366                                              |
| Zfp422   | 0.926   | 8.482 | 9.746  | 1.25E-09 | 5.64E-08 | 12.08 | <a href="#">67255</a>     | zinc finger protein 422                                              |
| Zfp516   | -0.8921 | 7.222 | -9.314 | 2.90E-09 | 1.14E-07 | 11.23 | <a href="#">329003</a>    | zinc finger protein 516                                              |
| Zfp606   | 0.5805  | 7.727 | 8.771  | 8.63E-09 | 2.81E-07 | 10.13 | <a href="#">67370</a>     | zinc finger protein 606                                              |
| Zfp69    | 1.241   | 8.211 | 14.06  | 8.98E-13 | 1.34E-10 | 19.36 | <a href="#">381549</a>    | zinc finger protein 69                                               |
| Zfp706   | 0.6601  | 9.22  | 8.296  | 2.31E-08 | 6.52E-07 | 9.132 | <a href="#">68036</a>     | zinc finger protein 706                                              |
| Zgrf1    | 0.879   | 6.552 | 10.34  | 4.11E-10 | 2.20E-08 | 13.21 | <a href="#">71643</a>     | zinc finger GRF-type containing 1                                    |
| Zik1     | 0.7248  | 5.882 | 8.814  | 7.89E-09 | 2.61E-07 | 10.22 | <a href="#">22775</a>     | zinc finger protein interacting with K protein 1                     |
| Zkscan16 | 2.617   | 5.871 | 12.07  | 2.00E-11 | 1.78E-09 | 16.25 | <a href="#">100041581</a> | zinc finger with KRAB and SCAN domains 16                            |
| Zkscan17 | 1.488   | 8.536 | 19.37  | 9.99E-16 | 8.82E-13 | 26.06 | <a href="#">268417</a>    | zinc finger with KRAB and SCAN domains 17                            |
| Zkscan7  | -0.9873 | 5.686 | -8.231 | 2.65E-08 | 7.35E-07 | 8.992 | <a href="#">382118</a>    | zinc finger with KRAB and SCAN domains 7                             |
| Zmynd15  | -0.9961 | 6.663 | -11.12 | 1.02E-10 | 6.83E-09 | 14.62 | <a href="#">574428</a>    | zinc finger MYND-type containing 15                                  |
| Zmynd19  | 0.7552  | 8.658 | 9.345  | 2.73E-09 | 1.08E-07 | 11.29 | <a href="#">67187</a>     | zinc finger MYND domain containing 19                                |
| Znrf3    | -1.017  | 7.986 | -9.229 | 3.44E-09 | 1.32E-07 | 11.06 | <a href="#">407821</a>    | zinc and ring finger 3                                               |
| Zranb3   | 0.6474  | 7.255 | 9.531  | 1.90E-09 | 7.94E-08 | 11.66 | <a href="#">226409</a>    | zinc finger RAN-binding domain containing 3                          |
| Zrsr1    | -0.8422 | 7.461 | -9.035 | 5.06E-09 | 1.84E-07 | 10.67 | <a href="#">22183</a>     | zinc finger (CCCH type) RNA binding motif and serine/arginine rich 1 |
| Zwilch   | 1.762   | 7.113 | 17.06  | 1.53E-14 | 6.20E-12 | 23.39 | <a href="#">68014</a>     | zwilch kinetochore protein                                           |
| Zyx      | -1.115  | 8.505 | -10.74 | 1.97E-10 | 1.21E-08 | 13.95 | <a href="#">22793</a>     | zyxin                                                                |
